# Supplementary material for: Unveil the transcriptional landscape at the Cryptococcus-host axis in mice and nonhuman primates
Source: PLoS Negl Trop Dis. 2019 Jul 22;13(7):e0007566. doi: 10.1371/journal.pntd.0007566 (PMC6675133; doi:10.1371/journal.pntd.0007566)
Supplement: S3 Table — (XLSX) [file pntd.0007566.s007.xlsx]

## Sheet: mouse lungs
Table S3. Differentially expressed C. neoformans genes in the mouse and monkey lungs.
Gene ID	Gene name	log2FoldChange (Infected/Uninfected)	Regulation	pvalue	padj	Description
CNAG_01464	FHB1	-9.68336	down	4.00054e-22	8.84593e-21	nitric oxide dioxygenase	#
CNAG_05258	SMG1	-8.16975	down	6.63621e-12	7.61679e-11	glucose-methanol-choline oxidoreductase	#
CNAG_06207		-7.92171	down	1.19892e-32	4.10779e-31	hypothetical protein	#
CNAG_06298		-7.46671	down	6.4731e-19	1.23078e-17	hypothetical protein	#
CNAG_02460	HEM13	-7.44074	down	6.88685e-11	7.23276e-10	coproporphyrinogen-III oxidase	#
CNAG_06388		-7.04339	down	5.86209e-22	1.29209e-20	hypothetical protein	#
CNAG_00776	MP88	-5.97931	down	3.11741e-23	7.38891e-22	immunoreactive mannoprotein MP88	#
CNAG_02775		-5.66012	down	2.1978e-08	1.80653e-07	hypothetical protein	#
CNAG_06297		-5.53022	down	3.17296e-22	7.10682e-21	hypothetical protein	#
CNAG_06608		-5.30554	down	6.83752e-06	4.07601e-05	hypothetical protein	#
CNAG_03194		-5.14154	down	1.56579e-05	8.86811e-05	saccharopine dehydrogenase, saccharopine dehydrogenase, variant	#
CNAG_03128		-5.05926	down	9.29592e-06	5.43388e-05	gamma-glutamyltransferase, gamma-glutamyltransferase, variant	#
CNAG_03333		-4.99491	down	1.33346e-20	2.76314e-19	cytoplasmic protein	#
CNAG_04173		-4.9457	down	1.48428e-05	8.44794e-05	hypothetical protein	#
CNAG_00250		-4.93213	down	2.94695e-05	0.000159094	hypothetical protein	#
CNAG_04659		-4.87896	down	3.25861e-69	2.71721e-67	pyruvate decarboxylase	#
CNAG_01119		-4.65123	down	1.46058e-10	1.48438e-09	POT family proton-dependent oligopeptide transporter	#
CNAG_03465	LAC1	-4.57587	down	4.62541e-06	2.84551e-05	laccase	#
CNAG_02542		-4.5206	down	3.84739e-52	2.31546e-50	fructosamine kinase	#
CNAG_04757		-4.41231	down	1.96599e-25	5.13457e-24	mitochondrial protein	#
CNAG_06745		-4.38088	down	7.18811e-28	2.08155e-26	histone H3	#
CNAG_04105		-4.37379	down	2.9318e-35	1.08508e-33	hypothetical protein	#
CNAG_04943		-4.37041	down	0.000126361	0.000600237	CBS domain-containing protein, CBS domain-containing protein, variant	#
CNAG_00938		-4.28179	down	1.92672e-05	0.000107539	hypothetical protein	#
CNAG_05106		-4.2805	down	0.000292848	0.00128936	hypothetical protein	#
CNAG_04891		-4.26805	down	2.75268e-14	3.83327e-13	hypothetical protein	#
CNAG_02984		-4.23632	down	0.000344644	0.00148616	sarcosine oxidase	#
CNAG_02988		-4.15717	down	0.000454934	0.00190593	acetyltransferase	#
CNAG_05520		-4.10715	down	0.000510826	0.00210317	hypothetical protein	#
CNAG_04027		-4.09531	down	1.44692e-30	4.61481e-29	hypothetical protein	#
CNAG_01072		-4.07269	down	0.000571023	0.00232555	amidase	#
CNAG_00407		-4.04527	down	1.1915e-43	5.57924e-42	glyoxal oxidase	#
CNAG_00916		-4.0406	down	0.000398999	0.00169299	transcription factor	#
CNAG_04043		-4.00605	down	2.02955e-06	1.31031e-05	hypothetical protein	#
CNAG_06136		-3.99232	down	0.000510509	0.00210312	hypothetical protein	#
CNAG_06290		-3.9703	down	3.53181e-22	7.8597e-21	high-affinity glucose transporter SNF3, high-affinity glucose transporter SNF3, variant	#
CNAG_02850		-3.95678	down	3.7725e-11	4.07961e-10	glucan endo-1,3-alpha-glucosidase agn1	#
CNAG_02692		-3.93593	down	1.45329e-12	1.74018e-11	nitroreductase	#
CNAG_01078		-3.93176	down	0.000902175	0.00347465	aldehyde dehydrogenase (NAD+)	#
CNAG_01529		-3.83771	down	0.000137931	0.000649845	solute carrier family 25 (mitochondrial phosphate transporter), member 23/24/25/41	#
CNAG_00714		-3.83332	down	0.00119891	0.00445869	hypothetical protein	#
CNAG_02361		-3.81299	down	0.000145343	0.000681515	MFS transporter, ACS family, pantothenate transporter	#
CNAG_06963		-3.79845	down	0.000191203	0.000874629	sugar transporter	#
CNAG_03759		-3.75713	down	2.7423e-07	1.97292e-06	conidiation-specific protein 6	#
CNAG_02182	GRE2	-3.74219	down	6.09255e-40	2.61904e-38	D-lactaldehyde dehydrogenase	#
CNAG_00107		-3.69932	down	3.46739e-07	2.46131e-06	hypothetical protein	#
CNAG_00516	PEX7	-3.68488	down	0.0018906	0.00663197	peroxisomal signal (PTS2) receptor	#
CNAG_00781		-3.6841	down	0.0013392	0.00489623	U6 snRNA-associated Sm-like protein LSm3	#
CNAG_04326		-3.67986	down	1.11049e-20	2.30802e-19	malate dehydrogenase (oxaloacetate-decarboxylating)	#
CNAG_05914		-3.66584	down	0.00195426	0.00683446	MFS transporter, SP family, general alpha glucoside:H+ symporter	#
CNAG_04434		-3.64505	down	0.00208966	0.00724916	hypothetical protein	#
CNAG_03533		-3.63682	down	0.00144432	0.00521993	JmjC domain-containing histone demethylation protein 1	#
CNAG_01761		-3.63052	down	3.33299e-19	6.46152e-18	hypothetical protein	#
CNAG_00315		-3.62164	down	6.36959e-17	1.0726e-15	HHE domain-containing protein	#
CNAG_05874		-3.58194	down	1.78871e-11	1.9903e-10	hypothetical protein	#
CNAG_05662	ITR4	-3.57253	down	3.13932e-11	3.40981e-10	sugar transporter	#
CNAG_05059		-3.52941	down	3.21619e-19	6.27021e-18	pyruvate dehydrogenase E1 component subunit beta	#
CNAG_02733		-3.51548	down	0.00367908	0.0118487	monosaccharide transporter	#
CNAG_03018		-3.49726	down	0.00218403	0.00752399	nuclear protein	#
CNAG_01946		-3.49291	down	0.000530449	0.00217619	allantoate permease	#
CNAG_01044		-3.48786	down	0.000536332	0.00219642	dihydroceramidase	#
CNAG_03391		-3.46569	down	0.0034928	0.0113371	mitochondrial inner membrane protein	#
CNAG_02553		-3.44811	down	0.00377083	0.0121104	short-chain dehydrogenase	#
CNAG_06672		-3.44488	down	2.97573e-08	2.42294e-07	formate dehydrogenase	#
CNAG_07845		-3.44265	down	0.00362016	0.0116971	hypothetical protein, hypothetical protein, variant 1, hypothetical protein, variant 2	#
CNAG_05050	GCS2	-3.42413	down	1.30831e-07	9.88514e-07	ADP-ribosylation factor GTPase-activating protein 1	#
CNAG_04988		-3.389	down	0.00298655	0.00988992	Gly-Xaa carboxypeptidase	#
CNAG_04523		-3.3835	down	0.00512727	0.0157645	glyceraldehyde-3-phosphate dehydrogenase, type I	#
CNAG_04926		-3.37224	down	0.00431122	0.0135689	hypothetical protein	#
CNAG_07745	MPD1	-3.3572	down	1.80489e-41	8.11145e-40	mannitol-1-phosphate dehydrogenase	#
CNAG_00519	ERG3	-3.35192	down	6.61457e-06	3.95332e-05	lathosterol oxidase	#
CNAG_04139		-3.34384	down	0.00466302	0.0145111	hypothetical protein	#
CNAG_03902		-3.3304	down	1.22515e-09	1.14584e-08	transcriptional regulatory protein	#
CNAG_02857		-3.32334	down	1.40742e-09	1.30398e-08	hypothetical protein	#
CNAG_03452		-3.32248	down	0.00365268	0.0117857	AFG1 family mitochondrial ATPase	#
CNAG_00337		-3.27977	down	8.81658e-18	1.5646e-16	hypothetical protein	#
CNAG_04083		-3.27285	down	6.65319e-06	3.97297e-05	dolichol kinase, dolichol kinase, variant	#
CNAG_01047		-3.26254	down	5.92404e-17	1.00001e-15	hypothetical protein	#
CNAG_00800		-3.25449	down	0.00125666	0.00463118	nicotinamidase	#
CNAG_06743		-3.25398	down	0.00592163	0.0178734	hypothetical protein	#
CNAG_05724		-3.20946	down	0.00135161	0.00493642	hypothetical protein	#
CNAG_00122		-3.19495	down	0.00541725	0.0165531	alpha-amylase	#
CNAG_06923	XFP2	-3.19206	down	1.74429e-34	6.32054e-33	xylulose 5-phosphate/fructose 6-phosphate phosphoketolase	#
CNAG_00106	TCO5	-3.18575	down	0.000140976	0.000662836	two-component-like sensor kinase	#
CNAG_06425		-3.15491	down	0.00772589	0.0224009	fungal specific transcription factor	#
CNAG_07822		-3.1454	down	0.00161485	0.00574918	FMN adenylyltransferase	#
CNAG_02528		-3.14241	down	7.76974e-12	8.87366e-11	hypothetical protein, hypothetical protein, variant	#
CNAG_01947		-3.12945	down	0.00817191	0.0234777	2,4-dienoyl-CoA reductase	#
CNAG_03051		-3.12717	down	0.00655209	0.0194957	polyamine transporter	#
CNAG_01927		-3.11832	down	0.00644325	0.0192297	hypothetical protein	#
CNAG_02967		-3.11262	down	2.00901e-08	1.65927e-07	hypothetical protein	#
CNAG_06604		-3.1012	down	0.00666509	0.019764	hypothetical protein	#
CNAG_06267		-3.09751	down	1.92726e-11	2.13417e-10	hypothetical protein	#
CNAG_02789		-3.08645	down	1.92138e-09	1.75203e-08	nitrogen permease regulator 2	#
CNAG_00740	SNF5	-3.07687	down	2.24034e-06	1.44236e-05	swi/snf chromatin-remodeling complex subunit	#
CNAG_02814		-3.06532	down	1.02098e-24	2.58834e-23	glycerol-3-phosphate dehydrogenase	#
CNAG_01027		-3.0648	down	2.6234e-11	2.86833e-10	succinate-semialdehyde dehydrogenase (NADP+)	#
CNAG_02888		-3.0635	down	0.00962949	0.0268949	gamma-glutamyltransferase	#
CNAG_07981		-3.06335	down	0.0075841	0.0220452	hypothetical protein	#
CNAG_03170		-3.05993	down	0.00748894	0.0218144	hypothetical protein	#
CNAG_04041		-3.0569	down	3.55562e-08	2.86812e-07	hypothetical protein	#
CNAG_00470		-3.05399	down	0.00220959	0.00759901	charged multivesicular body protein 1	#
CNAG_01847		-3.04687	down	0.00810538	0.0233156	hypothetical protein	#
CNAG_00727		-3.01349	down	4.30377e-15	6.44727e-14	mitochondrial protein with role in iron accumulation	#
CNAG_05329		-3.00959	down	0.0111708	0.0304983	myo-inositol 2-dehydrogenase, myo-inositol 2-dehydrogenase, variant	#
CNAG_02021		-2.9945	down	0.00868281	0.0246488	N-terminal acetyltransferase A complex catalytic subunit Ard1	#
CNAG_05939		-2.99423	down	4.05237e-14	5.56477e-13	hypothetical protein, hypothetical protein, variant	#
CNAG_01173	PAN1	-2.99365	down	0.00269047	0.00903919	hypothetical protein	#
CNAG_03396		-2.99029	down	0.000348172	0.00149857	NAD+ diphosphatase	#
CNAG_01737	ERG25	-2.98293	down	3.26693e-19	6.35124e-18	methylsterol monooxygenase	#
CNAG_06861	TAF12	-2.98063	down	0.00284203	0.00946114	putative TFIID and saga complex component	#
CNAG_05698		-2.9797	down	0.00962333	0.0268886	hypothetical protein	#
CNAG_04189		-2.97772	down	2.4331e-42	1.10786e-40	succinate dehydrogenase [ubiquinone] flavoprotein subunit, mitochondrial	#
CNAG_07555		-2.97668	down	0.00301509	0.00996534	hypothetical protein, hypothetical protein, variant	#
CNAG_03626		-2.97591	down	0.000396229	0.00168343	actin cross-linking protein	#
CNAG_05626		-2.97214	down	0.00289226	0.00960985	hypothetical protein	#
CNAG_05909		-2.96528	down	2.79191e-34	1.00118e-32	cytochrome c1, heme protein, mitochondrial	#
CNAG_00805		-2.96282	down	0.00298803	0.00989008	hypothetical protein	#
CNAG_01558		-2.95953	down	4.98568e-106	7.84225e-104	chlorophyll synthesis pathway protein BchC	#
CNAG_06448		-2.95521	down	0.0132618	0.0352071	cystathionine gamma-lyase	#
CNAG_02864		-2.94832	down	6.16275e-06	3.70568e-05	hypothetical protein	#
CNAG_02362		-2.94259	down	4.88619e-15	7.30294e-14	hypothetical protein	#
CNAG_01803		-2.93641	down	1.10626e-15	1.71669e-14	hypothetical protein	#
CNAG_04245	CHI22	-2.92671	down	1.82498e-13	2.37866e-12	endochitinase	#
CNAG_00342		-2.90977	down	0.000500956	0.0020752	hypothetical protein	#
CNAG_07491		-2.90226	down	0.0112966	0.0307931	glutaredoxin	#
CNAG_02690		-2.89506	down	6.46747e-05	0.000326487	pirin	#
CNAG_06649		-2.89499	down	0.0143922	0.0376591	haloacid dehalogenase, type II	#
CNAG_07560		-2.88589	down	0.0114332	0.0311533	hypothetical protein	#
CNAG_04233		-2.87819	down	0.0120729	0.0326068	hypothetical protein	#
CNAG_04264		-2.87648	down	0.000574655	0.00233577	ubiquinone biosynthesis monooxygenase COQ6	#
CNAG_04527		-2.8733	down	0.0119038	0.0322577	hypothetical protein	#
CNAG_00115		-2.86033	down	3.04565e-19	5.9545e-18	chlorophyll synthesis pathway protein BchC	#
CNAG_02581	CAS33	-2.85592	down	0.00419897	0.0132699	hypothetical protein	#
CNAG_00576		-2.8537	down	0.0162443	0.0418099	mitochondrial protein	#
CNAG_03761		-2.84024	down	9.29363e-05	0.000455856	mRNA 3'-end-processing protein RNA14	#
CNAG_05130		-2.83144	down	0.0193464	0.0481402	hypothetical protein	#
CNAG_00453		-2.82983	down	6.30761e-36	2.38552e-34	mitochondrial protein	#
CNAG_04120		-2.81979	down	0.000106206	0.000511936	RNA polymerase II subunit A domain phosphatase	#
CNAG_03037		-2.81764	down	0.0184571	0.0462832	hypothetical protein, hypothetical protein, variant	#
CNAG_00079		-2.81258	down	0.00574845	0.0174038	hypothetical protein	#
CNAG_06746		-2.80734	down	1.51868e-19	3.02904e-18	histone H2B	#
CNAG_00850		-2.80495	down	0.0183577	0.0461342	plant-inducible protein	#
CNAG_05125		-2.80169	down	0.000110573	0.000530336	diphosphomevalonate decarboxylase	#
CNAG_03226		-2.79487	down	3.42624e-14	4.7426e-13	succinate dehydrogenase [ubiquinone] iron-sulfur subunit, mitochondrial	#
CNAG_00904		-2.78878	down	0.0189641	0.0473315	aflatoxin efflux pump AFLT	#
CNAG_04112		-2.78309	down	1.75648e-05	9.85937e-05	oxidoreductase	#
CNAG_05704		-2.78155	down	0.0191699	0.0478107	ESCRT-II complex subunit VPS22	#
CNAG_04519		-2.77712	down	0.0150222	0.0391006	D-serine dehydratase	#
CNAG_01382		-2.77489	down	0.0151587	0.0393819	aspartyl-tRNA(Asn)/glutamyl-tRNA (Gln) amidotransferase subunit A	#
CNAG_04663		-2.77038	down	0.0157359	0.040683	hypothetical protein	#
CNAG_05809	HEM15	-2.76772	down	2.96235e-09	2.6489e-08	ferrochelatase	#
CNAG_04183		-2.76488	down	9.15124e-19	1.71178e-17	hypothetical protein	#
CNAG_01864		-2.76273	down	0.00582846	0.0176225	hypothetical protein	#
CNAG_04824		-2.75863	down	0.00571595	0.0173433	mitotic spindle assembly checkpoint protein MAD1	#
CNAG_03620		-2.75553	down	0.000966321	0.00369702	hypothetical protein	#
CNAG_03376		-2.73644	down	9.88515e-08	7.54301e-07	cytoplasmic protein, cytoplasmic protein, variant	#
CNAG_05720		-2.73533	down	0.00610882	0.0183663	GTPase inhibitor	#
CNAG_02896	ERG130	-2.73512	down	1.19575e-10	1.23152e-09	hydroxymethylglutaryl-CoA synthase	#
CNAG_02226		-2.73418	down	0.00122799	0.00454003	hypothetical protein	#
CNAG_04325		-2.73033	down	0.00625174	0.0187228	extradiol ring-cleavage dioxygenase	#
CNAG_05326		-2.72334	down	0.0170398	0.0434693	hypothetical protein	#
CNAG_04142		-2.72244	down	0.000486007	0.00202143	tartrate transporter	#
CNAG_05873		-2.72189	down	0.00648934	0.0193423	hypothetical protein	#
CNAG_02916		-2.71772	down	3.47242e-10	3.43815e-09	F-type H+-transporting ATPase subunit F	#
CNAG_01063		-2.69542	down	9.39691e-07	6.35117e-06	WD-repeat protein mip1	#
CNAG_01120		-2.68408	down	2.25328e-23	5.41491e-22	pyruvate dehydrogenase complex dihydrolipoamide acetyltransferase	#
CNAG_02102		-2.68286	down	0.0188293	0.0470291	hypothetical protein	#
CNAG_01082		-2.67754	down	5.99465e-06	3.61402e-05	hypothetical protein	#
CNAG_07509		-2.6725	down	0.00138628	0.00503956	xaa-Pro aminopeptidase	#
CNAG_04786		-2.66598	down	1.18548e-06	7.89674e-06	hypothetical protein, hypothetical protein, variant	#
CNAG_07808		-2.65733	down	9.92107e-06	5.77978e-05	alanine-glyoxylate transaminase/serine-glyoxylate transaminase/serine-pyruvate transaminase	#
CNAG_03948		-2.64902	down	6.10566e-10	5.86749e-09	NAD(P)H:quinone oxidoreductase, type IV	#
CNAG_02986	YSA1	-2.64293	down	1.90532e-36	7.28546e-35	ADP-ribose pyrophosphatase	#
CNAG_05855		-2.64173	down	5.00022e-05	0.000257873	hypothetical protein	#
CNAG_03216		-2.63854	down	0.0015868	0.00566679	CAMK protein kinase	#
CNAG_07715		-2.6323	down	0.000307165	0.00134713	hypothetical protein	#
CNAG_01539		-2.61717	down	4.56499e-06	2.81088e-05	myo-inositol-1-phosphate synthase	#
CNAG_07005	BSP2	-2.61288	down	0.00900063	0.0254259	hypothetical protein	#
CNAG_05041		-2.60361	down	7.82373e-11	8.16712e-10	NADH-ubiquinone oxidoreductase subunit 8	#
CNAG_03082		-2.60126	down	0.00211353	0.00729842	cupin domain-containing protein	#
CNAG_01230	MP98	-2.59519	down	1.84127e-36	7.0797e-35	chitin-deacetylase	#
CNAG_01846		-2.59483	down	4.27695e-19	8.22243e-18	flavoprotein	#
CNAG_00539		-2.59069	down	9.0502e-16	1.40756e-14	membrane transporter	#
CNAG_01667	COQ2	-2.58958	down	0.00947313	0.0265475	4-hydroxybenzoate polyprenyl transferase	#
CNAG_01777		-2.58815	down	6.57805e-05	0.000331585	glyoxylate reductase	#
CNAG_07481		-2.57077	down	7.30293e-05	0.00036545	hypothetical protein	#
CNAG_07936		-2.56505	down	0.00244544	0.00832918	hypothetical protein	#
CNAG_03275		-2.55412	down	0.0107164	0.0294553	glutaryl-CoA dehydrogenase, glutaryl-CoA dehydrogenase, variant	#
CNAG_06475		-2.55215	down	1.70985e-15	2.63561e-14	hypothetical protein	#
CNAG_01249		-2.54711	down	0.0108535	0.0297846	hypothetical protein	#
CNAG_05131		-2.54443	down	1.34088e-14	1.91741e-13	hypothetical protein	#
CNAG_01322		-2.53973	down	3.89649e-06	2.42515e-05	hypothetical protein	#
CNAG_06664		-2.53292	down	0.00262945	0.00887295	sorting nexin MVP1	#
CNAG_03232		-2.52768	down	4.42155e-08	3.53366e-07	lactamase	#
CNAG_06152		-2.52161	down	0.002633	0.00888059	hypothetical protein	#
CNAG_05219		-2.5196	down	8.87163e-07	6.02557e-06	hypothetical protein	#
CNAG_05226		-2.51504	down	0.00274776	0.00920933	hypothetical protein	#
CNAG_05776		-2.5101	down	0.00271614	0.00911215	hypothetical protein	#
CNAG_05240		-2.49714	down	7.22158e-08	5.59693e-07	signal recognition particle subunit SRP68	#
CNAG_03355	TCO4	-2.48994	down	1.59395e-09	1.46894e-08	two-component-like sensor kinase	#
CNAG_06302		-2.48994	down	0.0134498	0.0356243	hypothetical protein, hypothetical protein, variant	#
CNAG_06924		-2.48875	down	1.77939e-06	1.15744e-05	beta-fructofuranosidase	#
CNAG_04000		-2.48783	down	0.0126784	0.033886	cytochrome c oxidase assembly protein subunit 11	#
CNAG_03314		-2.48625	down	2.84407e-05	0.00015402	YTH domain family 2, YTH domain family 2, variant	#
CNAG_01928		-2.47726	down	0.00337618	0.0110219	xaa-Pro aminopeptidase	#
CNAG_02751		-2.4627	down	2.78864e-11	3.0394e-10	short-chain dehydrogenase	#
CNAG_02966		-2.45991	down	0.0141199	0.0370587	carboxypeptidase	#
CNAG_03723		-2.4596	down	0.0137698	0.0363466	nuclear protein	#
CNAG_00240		-2.45866	down	0.0142949	0.0374327	hypothetical protein	#
CNAG_00866		-2.45847	down	4.15486e-14	5.69421e-13	transketolase, transketolase, variant	#
CNAG_02088		-2.45466	down	0.0140704	0.036971	hypothetical protein	#
CNAG_05752	KAR3	-2.45307	down	0.0141046	0.0370325	kinesin microtuble motor protein	#
CNAG_01609		-2.45305	down	0.00342472	0.0111489	cystathionine gamma-synthase	#
CNAG_05035		-2.44533	down	0.0142391	0.0373008	ferredoxin-NADP+ reductase	#
CNAG_05792		-2.44518	down	8.15388e-06	4.79547e-05	20S proteasome subunit alpha 3	#
CNAG_07533		-2.44072	down	2.28101e-06	1.46446e-05	hypothetical protein	#
CNAG_02417		-2.43987	down	1.9446e-06	1.26012e-05	lipase/esterase	#
CNAG_06532		-2.43541	down	0.01476	0.0385049	hypothetical protein	#
CNAG_03556		-2.4251	down	0.0155963	0.0403671	dimethylaniline monooxygenase	#
CNAG_02459		-2.42406	down	6.82029e-08	5.30373e-07	Atypical/ABC1/ABC1-A protein kinase	#
CNAG_04467		-2.41462	down	0.00388001	0.0124035	succinate-semialdehyde dehydrogenase (NADP+)	#
CNAG_06529		-2.41046	down	0.000448544	0.00188144	hypothetical protein	#
CNAG_02852		-2.40933	down	7.76931e-15	1.13442e-13	4-aminobutyrate transaminase	#
CNAG_05248		-2.40331	down	2.92346e-06	1.84779e-05	clathrin binding protein	#
CNAG_01341		-2.40321	down	2.06075e-16	3.33234e-15	mannose-6-phosphate isomerase, mannose-6-phosphate isomerase, variant	#
CNAG_01843		-2.40028	down	2.86919e-06	1.8168e-05	elongation factor Ts, mitochondrial	#
CNAG_03084		-2.39878	down	8.22892e-07	5.61107e-06	endoribonuclease L-PSP	#
CNAG_06903		-2.39876	down	0.00427315	0.0134736	mRNA-decapping enzyme subunit 2	#
CNAG_06404		-2.39299	down	4.26543e-29	1.27797e-27	hypothetical protein	#
CNAG_01962		-2.38921	down	5.49218e-05	0.000281357	ubiquinone biosynthesis protein COQ4, mitochondrial	#
CNAG_04471		-2.38472	down	0.0169793	0.0433469	FAD dependent oxidoreductase	#
CNAG_02175		-2.36932	down	0.000270756	0.00119968	5'-3' exoribonuclease 1	#
CNAG_04275		-2.36753	down	0.0179729	0.0453979	metalloendopeptidase	#
CNAG_06376		-2.36582	down	2.15398e-05	0.000119071	vacuolar membrane protein	#
CNAG_02046		-2.36189	down	1.80814e-09	1.6575e-08	poly(A)-binding protein binding protein	#
CNAG_02791		-2.36171	down	0.0181437	0.0457294	hypothetical protein	#
CNAG_04284		-2.36014	down	8.11921e-11	8.46281e-10	hypothetical protein	#
CNAG_06001	ERG8	-2.35949	down	0.00474546	0.0147434	phosphomevalonate kinase	#
CNAG_03726		-2.35746	down	7.30794e-05	0.00036545	hypothetical protein, hypothetical protein, variant	#
CNAG_07108		-2.35699	down	1.90184e-05	0.000106236	tip120-family protein	#
CNAG_04879		-2.35568	down	8.77566e-20	1.77592e-18	glycogen debranching enzyme	#
CNAG_05782		-2.35219	down	0.00493828	0.0152648	mortality factor 4-like protein 1	#
CNAG_04656		-2.34432	down	1.97023e-05	0.000109702	arginine-tRNA-protein transferase, arginine-tRNA-protein transferase, variant	#
CNAG_06446		-2.34226	down	2.01699e-05	0.000112035	mitochondrial splicing suppressor	#
CNAG_01895		-2.33983	down	0.0192142	0.0478869	hypothetical protein	#
CNAG_02424		-2.33784	down	0.000317285	0.00138544	hypothetical protein	#
CNAG_04896		-2.33549	down	0.0196117	0.048702	tyrosine-tRNA ligase	#
CNAG_06440		-2.32587	down	0.0199387	0.0494076	DNA dependent ATPase	#
CNAG_00329		-2.32471	down	1.429e-05	8.14672e-05	NADH dehydrogenase (ubiquinone) 1 beta subcomplex 8	#
CNAG_02995		-2.30951	down	9.24476e-12	1.05235e-10	RNA-binding protein with serine-rich domain 1	#
CNAG_05997		-2.30934	down	3.86504e-10	3.80511e-09	hypothetical protein	#
CNAG_05167		-2.30506	down	9.68062e-22	2.12697e-20	hypothetical protein	#
CNAG_01896		-2.30423	down	3.83022e-33	1.33884e-31	alcohol dehydrogenase (NADP+)	#
CNAG_05559		-2.30288	down	0.000112675	0.000539297	hypothetical protein	#
CNAG_02007		-2.30197	down	4.25544e-10	4.15988e-09	adenylate kinase 1	#
CNAG_07638		-2.28861	down	0.000466096	0.00194915	hypothetical protein	#
CNAG_06781		-2.28556	down	1.80068e-07	1.32299e-06	hypothetical protein	#
CNAG_02100	FAS2	-2.28447	down	3.93537e-18	7.07446e-17	fatty acid synthase subunit alpha, fungi type	#
CNAG_00269		-2.28232	down	0.000231817	0.0010425	sorbitol dehydrogenase	#
CNAG_04962		-2.28152	down	3.74837e-05	0.000198641	hypothetical protein	#
CNAG_02683		-2.28107	down	0.00166168	0.00589202	hypothetical protein	#
CNAG_06534	HMG1	-2.27637	down	7.54325e-07	5.16899e-06	hydroxymethylglutaryl-CoA reductase (NADPH)	#
CNAG_02455		-2.27502	down	0.000499342	0.00207191	choline transporter	#
CNAG_05179		-2.26862	down	3.14084e-22	7.05771e-21	ubiquinol-cytochrome c reductase core subunit 2	#
CNAG_06075		-2.26401	down	6.63351e-26	1.75902e-24	hypothetical protein	#
CNAG_07660		-2.26329	down	1.91563e-18	3.5355e-17	pyruvate dehydrogenase (acetyl-transferring) E1 component, alpha subunit	#
CNAG_06175		-2.25537	down	9.36292e-12	1.06405e-10	26S proteasome regulatory subunit N2	#
CNAG_01735		-2.25013	down	2.89929e-12	3.39526e-11	hypothetical protein	#
CNAG_02426		-2.24578	down	1.29785e-05	7.44196e-05	pre-mRNA-splicing factor SYF1	#
CNAG_03007		-2.24307	down	1.74153e-19	3.44375e-18	hypothetical protein	#
CNAG_04224		-2.24171	down	0.00738511	0.0215573	carboxy-terminal domain RNA polymerase II polypeptide A small phosphatase, carboxy-terminal domain RNA polymerase II polypeptide A small phosphatase, variant	#
CNAG_05290	SPT3	-2.23548	down	0.0008176	0.00318615	transcription initiation protein SPT3	#
CNAG_01026		-2.2279	down	0.00209273	0.00724916	gamma-glutamyltransferase	#
CNAG_03191		-2.22746	down	5.61189e-06	3.40701e-05	hypothetical protein	#
CNAG_07744	PIK1	-2.22699	down	0.000175791	0.00080948	Atypical/PI4K protein kinase	#
CNAG_01914		-2.22418	down	2.03347e-05	0.00011286	mitochondrial protein	#
CNAG_04361		-2.22064	down	7.10465e-20	1.44621e-18	hypothetical protein	#
CNAG_00061	CIT1	-2.21672	down	3.82679e-35	1.40879e-33	citrate synthase, mitochondrial	#
CNAG_04141		-2.20731	down	9.35574e-05	0.000457928	vacuolar protein	#
CNAG_01563		-2.20013	down	0.00254068	0.00858597	histone deacetylase 6/10	#
CNAG_00626		-2.19972	down	5.94624e-24	1.4542e-22	hypothetical protein	#
CNAG_02577		-2.19888	down	2.46296e-11	2.71435e-10	oxidoreductase	#
CNAG_07517		-2.1987	down	0.00260458	0.0087933	hypothetical protein	#
CNAG_06418		-2.19302	down	0.00264908	0.00892615	PP2Cc protein phosphatase	#
CNAG_05759		-2.19198	down	6.40677e-11	6.73879e-10	acetyl-CoA carboxylase/biotin carboxylase	#
CNAG_00929		-2.1918	down	8.24836e-07	5.61879e-06	hypothetical protein	#
CNAG_03245	ZWF1	-2.1861	down	1.41779e-19	2.83598e-18	glucose-6-phosphate dehydrogenase	#
CNAG_04291		-2.1809	down	2.68083e-06	1.70533e-05	glycosyl-hydrolase	#
CNAG_03872	UBP7	-2.17941	down	0.00270041	0.00906819	ubiquitin carboxyl-terminal hydrolase	#
CNAG_07356		-2.17566	down	4.9736e-09	4.36168e-08	succinate dehydrogenase, cytochrome b556 subunit	#
CNAG_03157		-2.17564	down	0.00266307	0.00896018	hypothetical protein	#
CNAG_02030		-2.16891	down	4.78784e-17	8.16173e-16	glyoxal oxidase	#
CNAG_05383		-2.16288	down	2.9713e-07	2.12442e-06	hypothetical protein, hypothetical protein, variant 1, hypothetical protein, variant 2	#
CNAG_01818		-2.15675	down	0.000289822	0.00127761	ATP synthase mitochondrial F1 complex assembly factor 2	#
CNAG_01569		-2.15414	down	0.000994143	0.00379089	hypothetical protein	#
CNAG_07689		-2.15273	down	2.76524e-05	0.000149883	pre-mRNA-splicing factor CWC22	#
CNAG_07347		-2.15241	down	2.19682e-27	6.10611e-26	heat shock protein	#
CNAG_00520		-2.1515	down	1.27603e-09	1.19022e-08	hypothetical protein	#
CNAG_06432		-2.14671	down	3.06356e-23	7.28622e-22	acetate kinase	#
CNAG_03509		-2.14595	down	3.97949e-13	5.03511e-12	pyruvate dehydrogenase X component	#
CNAG_05694		-2.14278	down	0.00461354	0.014396	CMGC/CK2 protein kinase	#
CNAG_04119	ROM2	-2.13515	down	0.00366006	0.0117984	rho guanyl-nucleotide exchange factor	#
CNAG_02134	RSC8	-2.12885	down	3.28941e-05	0.000176344	rsc chromatin remodeling complex subunit	#
CNAG_01199		-2.12569	down	1.21887e-05	7.01816e-05	nuclear pore complex protein Nup62	#
CNAG_03742		-2.12302	down	8.84852e-08	6.78942e-07	staphylococcal nuclease domain-containing protein 1	#
CNAG_00462		-2.11729	down	5.49711e-05	0.000281402	electron-transferring-flavoprotein dehydrogenase	#
CNAG_00057		-2.11264	down	1.61967e-25	4.24611e-24	fructose-1,6-bisphosphatase I	#
CNAG_02365		-2.11207	down	0.0118382	0.0321177	amidase	#
CNAG_00482		-2.10288	down	2.74895e-10	2.73748e-09	26S proteasome regulatory subunit N10	#
CNAG_00148		-2.10026	down	3.27503e-08	2.65105e-07	hypothetical protein	#
CNAG_03213	UVE1	-2.094	down	5.49201e-09	4.79321e-08	UV damage endonuclease UvdE, UV damage endonuclease UvdE, variant	#
CNAG_01177		-2.09211	down	0.00398066	0.0126667	nuclear envelope-endoplasmic reticulum network protein	#
CNAG_04726		-2.08777	down	1.26641e-10	1.2985e-09	large subunit ribosomal protein L18Ae	#
CNAG_07688		-2.08593	down	5.34219e-05	0.000274283	hypothetical protein	#
CNAG_06770		-2.08443	down	1.45155e-24	3.63992e-23	fructose-bisphosphate aldolase 1	#
CNAG_04315		-2.08286	down	3.95627e-07	2.79117e-06	hypothetical protein	#
CNAG_00760		-2.07921	down	0.0131025	0.0349047	methylenetetrahydrofolate reductase	#
CNAG_03507		-2.0773	down	1.0953e-16	1.82225e-15	mitochondrial-processing peptidase subunit beta	#
CNAG_04168		-2.07697	down	1.39772e-07	1.05034e-06	histone H1/5	#
CNAG_07522		-2.06886	down	1.49765e-08	1.25335e-07	hypothetical protein	#
CNAG_06730	GSK3	-2.06575	down	1.14962e-07	8.7338e-07	similar to glycogen synthase kinase	#
CNAG_01446	HSP12	-2.0649	down	2.6971e-11	2.94427e-10	hypothetical protein	#
CNAG_05739		-2.06387	down	2.21904e-05	0.000122374	hypothetical protein	#
CNAG_04803		-2.06358	down	2.90664e-11	3.16302e-10	protein transporter SEC31	#
CNAG_04679		-2.06065	down	6.19222e-05	0.000313559	histone deacetylase complex subunit	#
CNAG_06824		-2.05744	down	0.00451795	0.0141424	hypothetical protein	#
CNAG_06744		-2.05719	down	0.0139104	0.0366478	chromatin structure-remodeling complex subunit RSC9	#
CNAG_07177		-2.05583	down	3.28643e-09	2.9189e-08	NADH dehydrogenase (ubiquinone) Fe-S protein 3	#
CNAG_04253		-2.05446	down	0.00457201	0.0142857	transmembrane protein	#
CNAG_02534		-2.05304	down	0.0144398	0.0377553	tRNA 2'-phosphotransferase	#
CNAG_05339		-2.04713	down	6.69544e-05	0.000336767	hypothetical protein	#
CNAG_07316		-2.04701	down	6.74642e-05	0.000339085	hydroxyacid-oxoacid transhydrogenase	#
CNAG_04104		-2.04635	down	0.000225065	0.00101374	mucin-desulfating sulfatase	#
CNAG_03721		-2.04616	down	0.001847	0.00650207	26S proteasome regulatory subunit N12	#
CNAG_00605		-2.0436	down	5.08527e-10	4.93621e-09	cytoplasmic protein	#
CNAG_04658		-2.04172	down	1.62708e-06	1.06136e-05	hypothetical protein	#
CNAG_03937		-2.0412	down	7.39345e-08	5.71733e-07	hypothetical protein	#
CNAG_03592		-2.0339	down	0.00200451	0.00697495	phosphomethylpyrimidine kinase	#
CNAG_05522		-2.02995	down	6.09916e-06	3.67063e-05	hypothetical protein	#
CNAG_03368		-2.02903	down	0.0181056	0.0456984	microtubule Associated protein, microtubule Associated protein, variant	#
CNAG_06028		-2.02762	down	0.0163564	0.0419782	hypothetical protein	#
CNAG_01323		-2.02349	down	6.8559e-20	1.3997e-18	ubiquinol-cytochrome c reductase subunit 7	#
CNAG_01395		-2.02074	down	9.34903e-05	0.000457928	ribose-5-phosphate isomerase	#
CNAG_01771		-2.01546	down	0.000253832	0.00113048	hypothetical protein	#
CNAG_06747		-2.0152	down	3.34421e-23	7.8994e-22	histone H2A, histone H2A, variant	#
CNAG_03771		-2.0102	down	1.87367e-38	7.67316e-37	DNA binding protein Ncp1, DNA binding protein Ncp1, variant	#
CNAG_05042		-2.00991	down	0.0163643	0.0419782	carnitine acetyltransferase	#
CNAG_00547		-2.0071	down	0.00219864	0.00757053	hypothetical protein	#
CNAG_05256	CAT2	-2.00581	down	3.14327e-11	3.40981e-10	catalase 2	#
CNAG_07354		-2.00274	down	3.92964e-05	0.00020777	3'(2'),5'-bisphosphate nucleotidase	#
CNAG_05063	SSK2	-2.00176	down	0.00204936	0.00711672	ste/ste11/ssk protein kinase	#
CNAG_00936		2.00172	up	5.19077e-11	5.54403e-10	lipid particle protein, lipid particle protein, variant	#
CNAG_07973		2.00414	up	0.00664872	0.0197239	hypothetical protein	#
CNAG_01760		2.00417	up	2.08048e-05	0.000115376	hypothetical protein	#
CNAG_02583		2.00472	up	0.00250128	0.00847351	tRNA (guanine10-N2)-methyltransferase	#
CNAG_01791		2.00618	up	6.3316e-11	6.68003e-10	ribosome production factor 1	#
CNAG_02517		2.00662	up	0.0198571	0.0492408	hypothetical protein	#
CNAG_00933		2.00711	up	5.5888e-11	5.95996e-10	hypothetical protein	#
CNAG_06345		2.00762	up	1.37302e-12	1.65552e-11	mitochondrial distribution and morphology protein 10	#
CNAG_05861		2.00919	up	2.09723e-07	1.53273e-06	hypothetical protein, hypothetical protein, variant	#
CNAG_05799	CDA1	2.00933	up	8.16191e-31	2.62738e-29	chitin deactylase	#
CNAG_03847		2.00946	up	4.59526e-51	2.67259e-49	hypothetical protein	#
CNAG_00613	FCY1	2.01222	up	0.000889471	0.00343145	cytosine deaminase	#
CNAG_00639	URO3	2.01283	up	5.2648e-08	4.18343e-07	hypothetical protein	#
CNAG_00425		2.01468	up	0.00676938	0.0200163	hypothetical protein	#
CNAG_07831		2.01614	up	0.00250518	0.00848256	hypothetical protein	#
CNAG_00632		2.01756	up	2.17401e-15	3.32149e-14	hypothetical protein	#
CNAG_06760		2.0178	up	4.32989e-05	0.000226338	hypothetical protein	#
CNAG_05801		2.01805	up	0.000781034	0.00306263	hypothetical protein	#
CNAG_05277		2.02133	up	1.4702e-27	4.15316e-26	vesicle-associated membrane protein 4, vesicle-associated membrane protein 4, variant	#
CNAG_00195		2.02421	up	1.76635e-06	1.15004e-05	exosome complex protein LRP1	#
CNAG_04850		2.02611	up	0.000104291	0.000503698	hypothetical protein, hypothetical protein, variant	#
CNAG_02299		2.03372	up	3.67746e-07	2.60509e-06	hypothetical protein	#
CNAG_04201		2.03386	up	0.000123503	0.000588682	hypothetical protein	#
CNAG_01499		2.03455	up	9.95173e-05	0.000483827	hypothetical protein, hypothetical protein, variant	#
CNAG_02454		2.03725	up	5.15925e-10	5.001e-09	H/ACA ribonucleoprotein complex non-core subunit NAF1	#
CNAG_05151		2.04099	up	5.62845e-10	5.43298e-09	U3 small nucleolar RNA-associated protein 11	#
CNAG_02089		2.04126	up	1.44606e-13	1.89909e-12	hypothetical protein	#
CNAG_06259		2.04145	up	0.000125688	0.00059745	MFS transporter, SP family, general alpha glucoside:H+ symporter	#
CNAG_02409	LIV5	2.04525	up	2.03597e-15	3.12438e-14	protein of unknown function	#
CNAG_03113		2.04707	up	9.63791e-34	3.42072e-32	trehalose synthase	#
CNAG_04571		2.04826	up	5.81204e-05	0.000295556	dimethyladenosine transferase	#
CNAG_01179		2.05042	up	4.77249e-11	5.13692e-10	DNA-directed RNA polymerase I and III subunit RPAC1	#
CNAG_04899		2.05142	up	2.34511e-07	1.70489e-06	cytoplasmic protein, cytoplasmic protein, variant	#
CNAG_02378		2.05164	up	1.71773e-20	3.54878e-19	H/ACA ribonucleoprotein complex subunit 2	#
CNAG_02478		2.05411	up	3.20884e-05	0.000172166	glycerol dehydrogenase	#
CNAG_00505		2.05697	up	7.16496e-06	4.26386e-05	hypothetical protein	#
CNAG_01913		2.06098	up	1.35805e-05	7.76141e-05	hypothetical protein	#
CNAG_05016		2.0637	up	0.000611869	0.0024592	hypothetical protein	#
CNAG_03312		2.06517	up	0.00180488	0.00637326	hypothetical protein	#
CNAG_03763		2.06556	up	9.40163e-15	1.35843e-13	IQ domain-containing GTPase activating protein	#
CNAG_02752		2.071	up	1.78446e-13	2.33464e-12	short-chain dehydrogenase	#
CNAG_05057		2.07189	up	2.19915e-07	1.60383e-06	hypothetical protein, hypothetical protein, variant	#
CNAG_01629		2.07454	up	0.000224217	0.00101161	multifunctional methyltransferase subunit TRM112	#
CNAG_05274		2.07515	up	4.45903e-05	0.000232212	STE/STE20/YSK protein kinase	#
CNAG_05119		2.07619	up	1.16827e-06	7.79709e-06	GabA permease	#
CNAG_07536		2.07743	up	5.56704e-08	4.40841e-07	DNA-directed RNA polymerase I subunit RPA43	#
CNAG_00129		2.07907	up	2.54637e-08	2.08808e-07	hypothetical protein	#
CNAG_01034		2.0813	up	0.0153875	0.0398865	hypothetical protein	#
CNAG_00495		2.08313	up	9.01496e-09	7.74101e-08	hypothetical protein	#
CNAG_01232	PMC1	2.08375	up	1.80397e-50	1.02339e-48	putative calcium-transporting ATPase	#
CNAG_03719		2.08425	up	0.000534177	0.00219019	hypothetical protein	#
CNAG_02658		2.08726	up	2.39613e-09	2.16214e-08	hypothetical protein	#
CNAG_04951		2.08756	up	2.24883e-22	5.1537e-21	3-deoxy-7-phosphoheptulonate synthase	#
CNAG_03829		2.08983	up	8.21707e-14	1.10001e-12	L-carnitine dehydratase/bile acid-inducible protein F	#
CNAG_03078		2.09132	up	7.82572e-30	2.40719e-28	type I phosphodiesterase/nucleotide pyrophosphatase	#
CNAG_01983		2.09472	up	1.77377e-19	3.49751e-18	cAMP-independent regulatory protein	#
CNAG_02659		2.09623	up	6.41617e-06	3.84804e-05	hypothetical protein, hypothetical protein, variant	#
CNAG_03776		2.10042	up	7.88444e-05	0.000392295	hypothetical protein	#
CNAG_00144		2.10594	up	1.02421e-08	8.77299e-08	hypothetical protein, hypothetical protein, variant	#
CNAG_07668		2.10687	up	1.618e-06	1.05643e-05	hypothetical protein	#
CNAG_00549		2.10949	up	0.00251908	0.0085213	hypothetical protein, hypothetical protein, variant	#
CNAG_06524	FRE3	2.1101	up	1.34817e-06	8.88635e-06	hypothetical protein, hypothetical protein, variant	#
CNAG_00587		2.11489	up	6.49263e-09	5.63808e-08	hypothetical protein	#
CNAG_07330		2.12133	up	6.96205e-05	0.000349224	hypothetical protein	#
CNAG_07732		2.12154	up	7.00567e-11	7.3464e-10	amidohydrolase 2	#
CNAG_00485		2.12376	up	4.35125e-29	1.29806e-27	hypothetical protein	#
CNAG_06206		2.12378	up	1.64211e-14	2.30997e-13	ATP-dependent RNA helicase DBP9	#
CNAG_00764		2.12511	up	1.13485e-08	9.62537e-08	ATP-dependent RNA helicase DBP4	#
CNAG_03889		2.12746	up	0.00385733	0.0123481	hypothetical protein	#
CNAG_00066		2.12948	up	1.19308e-43	5.57924e-42	membrane protein	#
CNAG_02169		2.12985	up	0.0130849	0.0348713	hypothetical protein	#
CNAG_01084	UBC4	2.13064	up	1.00029e-06	6.72787e-06	ubiquitin-conjugating enzyme 4	#
CNAG_07609		2.13164	up	1.21624e-06	8.09388e-06	ATP-dependent RNA helicase DDX51/DBP6	#
CNAG_02270	MET2	2.13235	up	1.7291e-07	1.27717e-06	homoserine O-acetyltransferase	#
CNAG_04770		2.13303	up	4.23407e-11	4.57161e-10	nucleolar essential protein 1	#
CNAG_03047		2.13344	up	3.53694e-10	3.49203e-09	hypothetical protein	#
CNAG_06611		2.13523	up	3.09636e-15	4.68926e-14	DNA-directed RNA polymerase I subunit RPA2	#
CNAG_00794		2.13763	up	2.03874e-16	3.30448e-15	hypothetical protein	#
CNAG_04869	PNB1	2.14006	up	2.40123e-17	4.16514e-16	para-nitrobenzyl esterase	#
CNAG_00627		2.14789	up	0.00119795	0.00445755	specific transcriptional repressor	#
CNAG_01866		2.15045	up	2.33658e-08	1.91833e-07	hypothetical protein	#
CNAG_04492		2.15353	up	0.000124086	0.000591052	hypothetical protein	#
CNAG_04886		2.15363	up	8.08963e-09	6.96372e-08	hypothetical protein	#
CNAG_07751		2.15634	up	6.34569e-08	4.97378e-07	siderophore iron transporter MirB	#
CNAG_03250		2.15742	up	1.74395e-07	1.28677e-06	hypothetical protein	#
CNAG_06515		2.15965	up	2.76049e-12	3.24369e-11	hypothetical protein	#
CNAG_05653	MLS1	2.1607	up	3.85957e-22	8.56156e-21	malate synthase A	#
CNAG_02162		2.16144	up	1.2024e-10	1.23469e-09	U3 small nucleolar RNA-associated protein 24	#
CNAG_05190		2.16346	up	7.97947e-24	1.94457e-22	hypothetical protein	#
CNAG_01419		2.16445	up	9.02765e-44	4.30899e-42	hypothetical protein	#
CNAG_05864		2.16466	up	4.64759e-19	8.88562e-18	hypothetical protein	#
CNAG_05973		2.16523	up	1.24571e-06	8.26609e-06	serine carboxypeptidase	#
CNAG_04034		2.16621	up	0.000528149	0.00216804	hypothetical protein	#
CNAG_06929		2.17125	up	5.06953e-12	5.8477e-11	IQ domain-containing GTPase activating protein, IQ domain-containing GTPase activating protein, variant 1, IQ domain-containing GTPase activating protein, variant 2	#
CNAG_07865		2.17273	up	6.06397e-15	8.91056e-14	ferro-O2-oxidoreductase	#
CNAG_03140		2.17382	up	1.59081e-29	4.78696e-28	sugar transporter	#
CNAG_00998		2.17477	up	1.46076e-25	3.84408e-24	hypothetical protein, hypothetical protein, variant	#
CNAG_02386		2.17484	up	7.72958e-10	7.33833e-09	hypothetical protein	#
CNAG_01612		2.17763	up	0.000314511	0.00137507	CAMK/CAMKL protein kinase, CAMK/CAMKL protein kinase, variant	#
CNAG_00688		2.18012	up	1.02739e-06	6.89678e-06	hypothetical protein	#
CNAG_02168		2.18309	up	1.92627e-17	3.35812e-16	glucoamylase	#
CNAG_01281		2.18424	up	6.21305e-06	3.73269e-05	hypothetical protein	#
CNAG_06742		2.18594	up	1.3317e-22	3.0825e-21	pre-60S factor REI1	#
CNAG_06798		2.19199	up	1.84066e-18	3.40621e-17	U3 small nucleolar RNA-associated protein 18	#
CNAG_05313		2.19257	up	1.68193e-15	2.59836e-14	hypothetical protein, hypothetical protein, variant 1, hypothetical protein, variant 2, hypothetical protein, variant 3, hypothetical protein, variant 4	#
CNAG_00809		2.1941	up	1.23652e-22	2.87179e-21	ATP-dependent RNA helicase ded1	#
CNAG_00603		2.19488	up	2.71388e-06	1.72319e-05	pre-rRNA-processing protein PNO1	#
CNAG_03115		2.19731	up	1.46237e-08	1.2268e-07	hypothetical protein	#
CNAG_04294		2.19759	up	7.35951e-12	8.43297e-11	hypothetical protein	#
CNAG_04062		2.19882	up	8.85193e-13	1.09205e-11	ribosome biogenesis protein ENP2	#
CNAG_02060		2.19929	up	0.000620469	0.00248943	hypothetical protein	#
CNAG_00546	CHS4	2.20204	up	4.6464e-20	9.54234e-19	putative chitin synthase	#
CNAG_03735	CAP4	2.20364	up	1.1994e-10	1.23344e-09	hypothetical protein	#
CNAG_06338		2.20849	up	3.85418e-06	2.40097e-05	ABC transporter PMR5	#
CNAG_03407		2.20959	up	0.0165851	0.0424818	hypothetical protein	#
CNAG_06766		2.2096	up	4.49931e-18	8.06728e-17	U3 small nucleolar RNA-associated protein 14	#
CNAG_06645	MTD1	2.21375	up	5.74517e-17	9.72184e-16	methylenetetrahydrofolate dehydrogenase [NAD(+)]	#
CNAG_05717		2.21474	up	0.000898058	0.00346072	hypothetical protein	#
CNAG_03683		2.22936	up	7.18592e-15	1.05145e-13	short-chain dehydrogenase/reductase SDR	#
CNAG_02681		2.22978	up	4.27296e-15	6.41499e-14	phytase	#
CNAG_04436		2.23292	up	2.89667e-09	2.59687e-08	hypothetical protein	#
CNAG_03238		2.23303	up	1.82659e-07	1.3406e-06	dioxygenase subfamily protein	#
CNAG_02317		2.23395	up	1.17684e-08	9.94492e-08	protein arginine N-methyltransferase 3	#
CNAG_05731		2.24404	up	5.7816e-28	1.68128e-26	glyoxal oxidase	#
CNAG_04520		2.24437	up	1.5443e-07	1.14802e-06	D-aminoacylase	#
CNAG_05654		2.24648	up	1.11411e-18	2.07278e-17	hypothetical protein	#
CNAG_07601		2.24692	up	3.50582e-10	3.46625e-09	hypothetical protein, hypothetical protein, variant	#
CNAG_03876		2.25	up	9.70189e-13	1.19055e-11	Ras family protein	#
CNAG_01787		2.2502	up	0.0126149	0.0338141	hypothetical protein	#
CNAG_02452		2.25173	up	0.000701044	0.00277412	hypothetical protein	#
CNAG_08021		2.25708	up	9.80899e-10	9.2114e-09	hypothetical protein	#
CNAG_00097	ITR1	2.2581	up	1.98789e-12	2.34781e-11	myo-inositol transporter	#
CNAG_03707		2.26646	up	1.85377e-09	1.69484e-08	efflux protein	#
CNAG_05045		2.26945	up	0.000186398	0.000854343	hypothetical protein	#
CNAG_05441		2.2723	up	5.08558e-12	5.85646e-11	lipid particle protein	#
CNAG_00028		2.2763	up	4.74382e-12	5.48647e-11	high-affinity nicotinic acid transporter, high-affinity nicotinic acid transporter, variant	#
CNAG_05032		2.28052	up	3.39675e-12	3.9711e-11	hypothetical protein	#
CNAG_00744	OCH1	2.2828	up	2.7616e-18	5.04302e-17	alpha 1,6-mannosyltransferase	#
CNAG_07537		2.28375	up	5.32585e-05	0.000273647	mitochondrial GTPase 1, mitochondrial GTPase 1, variant	#
CNAG_02750		2.28415	up	0.000585259	0.00237153	hypothetical protein, hypothetical protein, variant 1, hypothetical protein, variant 2	#
CNAG_01736		2.2847	up	0.00724368	0.0211891	DASH complex subunit DAD4	#
CNAG_00513		2.28509	up	5.15648e-14	6.97031e-13	nucleolar protein 53	#
CNAG_03366	ZNF2	2.28964	up	4.33205e-16	6.90832e-15	hypothetical protein, hypothetical protein, variant	#
CNAG_05651		2.29178	up	4.44178e-05	0.000231662	hypothetical protein	#
CNAG_02531	CPK1	2.30018	up	3.93681e-05	0.00020799	mitogen activated protein kinase	#
CNAG_05529		2.30667	up	6.98254e-10	6.63821e-09	hypothetical protein, hypothetical protein, variant	#
CNAG_06411		2.31063	up	3.60228e-05	0.000191339	mutanase	#
CNAG_04457		2.31092	up	0.00859441	0.0244782	hypothetical protein	#
CNAG_01756		2.31559	up	9.92705e-12	1.1208e-10	mitochondrial import inner membrane translocase subunit TIM22	#
CNAG_07417		2.3184	up	0.00178371	0.00630492	hypothetical protein	#
CNAG_00166		2.32192	up	3.09202e-08	2.50878e-07	ATP-dependent RNA helicase DBP8	#
CNAG_05360		2.32537	up	2.18904e-09	1.98562e-08	ATP-dependent RNA helicase MAK5	#
CNAG_06845		2.32564	up	1.27009e-05	7.28881e-05	STE/STE11/CDC15 protein kinase	#
CNAG_06698		2.32825	up	7.35812e-09	6.36569e-08	phosphatase	#
CNAG_02185		2.33292	up	2.98767e-08	2.42981e-07	nuclear protein	#
CNAG_06326		2.33603	up	3.80802e-05	0.000201647	solute carrier family 40 (iron-regulated transporter), member 1	#
CNAG_03929	CAS42	2.33943	up	3.31645e-21	7.04085e-20	solute carrier family 35, member C2	#
CNAG_00925		2.34035	up	8.95933e-06	5.25042e-05	hypothetical protein, hypothetical protein, variant	#
CNAG_05810		2.34331	up	0.000103288	0.000499553	hypothetical protein	#
CNAG_07692		2.34359	up	5.30686e-31	1.7163e-29	nucleoside phosphatase	#
CNAG_04185		2.34371	up	2.42303e-34	8.73427e-33	hypothetical protein	#
CNAG_07702		2.34527	up	0.00707192	0.0207393	hypothetical protein	#
CNAG_02781		2.34625	up	1.42577e-14	2.02624e-13	dihydrodipicolinate synthetase, dihydrodipicolinate synthetase, variant	#
CNAG_03866		2.34738	up	2.09605e-06	1.35198e-05	solute carrier family 32 (vesicular inhibitory amino acid transporter)	#
CNAG_04077		2.34796	up	7.65819e-06	4.51468e-05	hypothetical protein	#
CNAG_00077		2.34846	up	1.38078e-14	1.97039e-13	solute carrier family 26 (sodium-independent sulfate anion transporter), member 11	#
CNAG_03437		2.34873	up	6.49825e-25	1.66572e-23	hypothetical protein	#
CNAG_03975		2.34969	up	1.73509e-11	1.93375e-10	ribosome biogenesis protein ERB1	#
CNAG_03378		2.35502	up	1.8403e-26	4.99479e-25	hypothetical protein	#
CNAG_06827		2.35523	up	4.2577e-05	0.00022307	hypothetical protein, hypothetical protein, variant	#
CNAG_06319		2.35876	up	0.000405315	0.00171571	hypothetical protein	#
CNAG_07672		2.3646	up	3.80739e-13	4.82618e-12	hypothetical protein	#
CNAG_01603		2.37318	up	2.38471e-32	8.09049e-31	hypothetical protein	#
CNAG_02684		2.37365	up	8.89129e-53	5.49434e-51	hypothetical protein	#
CNAG_07633		2.37638	up	2.30785e-05	0.000127069	hypothetical protein	#
CNAG_01132		2.37976	up	1.25738e-12	1.52941e-11	nucleolar protein 6	#
CNAG_00798		2.38452	up	0.0192566	0.0479579	hypothetical protein	#
CNAG_01331		2.38871	up	1.67789e-11	1.87301e-10	hypothetical protein	#
CNAG_05401		2.39049	up	6.84799e-13	8.49371e-12	hypothetical protein	#
CNAG_06228		2.39507	up	2.85485e-12	3.34889e-11	MIF4G/MA4 domain-containing protein	#
CNAG_01420		2.39876	up	1.12296e-32	3.86668e-31	hypothetical protein	#
CNAG_04694		2.40504	up	3.09771e-26	8.27771e-25	periodic tryptophan protein 1	#
CNAG_03012	CQS1	2.40563	up	4.52184e-37	1.76812e-35	quorum sensing-like molecule	#
CNAG_06367		2.40699	up	4.01703e-23	9.42437e-22	U3 small nucleolar RNA-associated protein 3	#
CNAG_07492		2.40774	up	0.020188	0.0499183	hypothetical protein	#
CNAG_05941		2.41592	up	0.00485935	0.0150544	hypothetical protein	#
CNAG_01313		2.42262	up	3.93201e-18	7.07446e-17	hypothetical protein	#
CNAG_00321		2.42296	up	0.0174481	0.0442499	dRaptor	#
CNAG_01353		2.42496	up	0.0010003	0.00381018	hypothetical protein	#
CNAG_06213		2.42677	up	5.97062e-35	2.17488e-33	hypothetical protein	#
CNAG_05543		2.42848	up	8.89777e-07	6.0374e-06	hypothetical protein, hypothetical protein, variant	#
CNAG_06913		2.42975	up	1.60344e-13	2.10178e-12	L-serine ammonia-lyase	#
CNAG_04712		2.43109	up	4.85994e-11	5.22293e-10	solute carrier family 25 (mitochondrial dicarboxylate transporter), member 10	#
CNAG_05432		2.43148	up	0.0172095	0.0438216	hypothetical protein	#
CNAG_03046		2.43429	up	6.11997e-48	3.20881e-46	hypothetical protein	#
CNAG_03807		2.44159	up	1.76579e-05	9.90358e-05	E3 ubiquitin-protein ligase CCNP1IP1, E3 ubiquitin-protein ligase CCNP1IP1, variant	#
CNAG_00366		2.44186	up	0.00466142	0.0145111	hypothetical protein	#
CNAG_03954		2.44361	up	9.34783e-10	8.81422e-09	ribosomal RNA-processing protein 17	#
CNAG_06472		2.45062	up	3.87063e-24	9.53332e-23	nucleolar protein 4	#
CNAG_06862		2.45374	up	1.8974e-13	2.46377e-12	vacuolar protein, vacuolar protein, variant 1, vacuolar protein, variant 2	#
CNAG_06336		2.45963	up	1.19162e-27	3.37999e-26	glucan 1,3-beta-glucosidase	#
CNAG_02667		2.46084	up	2.60333e-11	2.85089e-10	hypothetical protein	#
CNAG_05652		2.46222	up	4.88484e-50	2.70464e-48	cytoplasmic protein	#
CNAG_07444		2.46714	up	0.016614	0.0425399	hypothetical protein	#
CNAG_01858		2.46738	up	5.66732e-07	3.94603e-06	hypothetical protein	#
CNAG_06650		2.47434	up	3.52028e-06	2.2057e-05	hypothetical protein, hypothetical protein, variant	#
CNAG_06865		2.4754	up	2.46532e-12	2.90178e-11	translation machinery-associated protein 16	#
CNAG_06708		2.47668	up	6.02373e-07	4.17737e-06	dCMP deaminase	#
CNAG_00674		2.47895	up	3.32517e-28	9.83482e-27	hypothetical protein	#
CNAG_07567		2.48681	up	6.41619e-12	7.37649e-11	hypothetical protein	#
CNAG_04086		2.48703	up	5.10532e-13	6.38347e-12	hypothetical protein	#
CNAG_06516		2.48927	up	2.10723e-15	3.22659e-14	hypothetical protein	#
CNAG_00775		2.48964	up	4.38854e-12	5.09615e-11	U3 small nucleolar RNA-associated protein 15	#
CNAG_01687		2.4927	up	4.89606e-15	7.30294e-14	Atypical/RIO/RIO2 protein kinase	#
CNAG_02516		2.49406	up	4.03862e-14	5.55691e-13	hypothetical protein, hypothetical protein, variant 1, hypothetical protein, variant 2	#
CNAG_06383		2.49446	up	2.40052e-10	2.40435e-09	cytoplasmic protein	#
CNAG_05278		2.49557	up	0.0147488	0.0384904	hypothetical protein, hypothetical protein, variant	#
CNAG_01814		2.49849	up	1.49855e-16	2.46939e-15	hypothetical protein	#
CNAG_04610		2.49958	up	0.000158384	0.000736678	hypothetical protein	#
CNAG_05872		2.50141	up	2.71353e-24	6.70725e-23	endopeptidase	#
CNAG_00104		2.50331	up	5.72259e-30	1.78406e-28	elongation factor 3	#
CNAG_01247		2.50731	up	0.00550823	0.0167793	hypothetical protein	#
CNAG_06320		2.50996	up	1.73471e-54	1.11166e-52	hypothetical protein	#
CNAG_04395		2.51043	up	2.32862e-18	4.2636e-17	protein BFR2	#
CNAG_07909		2.51524	up	3.39829e-05	0.000181338	meiotic recombinase Dmc1	#
CNAG_04997		2.519	up	6.16302e-11	6.52206e-10	cytoplasmic protein	#
CNAG_01542		2.52081	up	1.02074e-16	1.7023e-15	taurine catabolism dioxygenase TauD	#
CNAG_02464		2.52451	up	1.42135e-11	1.59177e-10	5-oxoprolinase (ATP-hydrolysing)	#
CNAG_00871		2.5307	up	3.98607e-10	3.91869e-09	hypothetical protein, hypothetical protein, variant	#
CNAG_06507		2.53233	up	0.0149262	0.0388799	hypothetical protein	#
CNAG_04777		2.5344	up	0.000387772	0.00164952	S-adenosylmethionine-dependent methyltransferase	#
CNAG_05695		2.5366	up	1.52898e-27	4.30167e-26	glucosamine 6-phosphate N-acetyltransferase	#
CNAG_03695	CAS41	2.54205	up	0.000134528	0.000634677	probable sugar phosphate/phosphate translocator; capsule biosynthetic protein	#
CNAG_04037		2.54252	up	8.74359e-20	1.77462e-18	hypothetical protein	#
CNAG_03822		2.54391	up	1.49355e-09	1.38194e-08	monolysocardiolipin acyltransferase	#
CNAG_03389		2.5476	up	2.31251e-18	4.24532e-17	alpha-ketoglutarate catabolism dioxygenase	#
CNAG_05459		2.55017	up	1.68667e-19	3.35443e-18	Pi-transporter A-1	#
CNAG_03838		2.55488	up	0.000606968	0.00244661	hypothetical protein	#
CNAG_06784		2.55686	up	2.45198e-05	0.00013394	hypothetical protein, hypothetical protein, variant	#
CNAG_01098		2.55738	up	1.40082e-17	2.45446e-16	pre-rRNA-processing protein IPI1	#
CNAG_01690		2.5582	up	1.1292e-13	1.49717e-12	MFS transporter, MFS transporter, variant 1, MFS transporter, variant 2	#
CNAG_07657		2.56387	up	5.47961e-10	5.2967e-09	U3 small nucleolar RNA-associated protein 19	#
CNAG_03327		2.56477	up	0.00271603	0.00911215	hypothetical protein	#
CNAG_01059		2.56539	up	3.804e-12	4.42479e-11	vacuolar membrane protein, vacuolar membrane protein, variant	#
CNAG_05916		2.56665	up	2.65304e-17	4.57898e-16	hypothetical protein	#
CNAG_06349		2.56669	up	0.00306189	0.0101056	hypothetical protein	#
CNAG_03161		2.56747	up	6.61431e-33	2.30038e-31	hypothetical protein	#
CNAG_03076		2.56887	up	0.000501334	0.0020752	hypothetical protein	#
CNAG_05180		2.56898	up	9.62663e-41	4.24369e-39	hypothetical protein	#
CNAG_07043		2.56946	up	1.23323e-06	8.19114e-06	hypothetical protein	#
CNAG_01714		2.57961	up	0.00010196	0.000493817	sulfonate dioxygenase	#
CNAG_02392		2.58012	up	2.00914e-05	0.000111689	hypothetical protein	#
CNAG_04085		2.58458	up	1.84678e-09	1.69068e-08	oxidoreductase, oxidoreductase, variant	#
CNAG_00680		2.58537	up	1.90665e-12	2.25572e-11	kinetochore protein Nuf2, kinetochore protein Nuf2, variant	#
CNAG_01680		2.59016	up	8.35501e-11	8.66942e-10	3-methylcrotonyl-CoA carboxylase alpha subunit	#
CNAG_07966		2.591	up	1.12796e-08	9.5787e-08	hypothetical protein	#
CNAG_07432		2.59488	up	0.000106666	0.000513736	hypothetical protein	#
CNAG_05666		2.59979	up	3.98187e-06	2.4694e-05	hypothetical protein	#
CNAG_00126		2.60511	up	4.85864e-48	2.56692e-46	2-deoxy-D-gluconate 3-dehydrogenase	#
CNAG_05430		2.60592	up	2.35869e-22	5.38763e-21	hypothetical protein	#
CNAG_01318		2.61001	up	4.13054e-52	2.44337e-50	sodium/hydrogen exchanger 3	#
CNAG_07458		2.61072	up	5.61784e-14	7.57915e-13	hypothetical protein, hypothetical protein, variant	#
CNAG_05571		2.61243	up	1.68994e-21	3.67801e-20	U3 small nucleolar RNA-associated protein 20	#
CNAG_06284		2.61486	up	3.78762e-14	5.22193e-13	hypothetical protein	#
CNAG_00845		2.62605	up	3.14611e-15	4.75419e-14	hypothetical protein	#
CNAG_02600		2.6279	up	0.00565337	0.017176	tartrate transporter	#
CNAG_05338		2.62934	up	9.34716e-07	6.32372e-06	hypothetical protein	#
CNAG_04215	MET3	2.62992	up	2.35806e-27	6.52807e-26	sulfate adenylyltransferase	#
CNAG_01229		2.63023	up	1.04332e-27	2.97153e-26	L-mandelate dehydrogenase	#
CNAG_00137		2.6316	up	4.21991e-47	2.19594e-45	hypothetical protein	#
CNAG_04474		2.64258	up	1.02592e-06	6.89359e-06	monocarboxylic acid transporter	#
CNAG_03426	GMT2	2.64695	up	1.64208e-39	6.88777e-38	GDP-mannose transporter 2	#
CNAG_00488		2.6492	up	1.77319e-09	1.62978e-08	hypothetical protein, hypothetical protein, variant	#
CNAG_07457		2.65014	up	1.39911e-17	2.45446e-16	hypothetical protein	#
CNAG_01698		2.65675	up	7.18143e-16	1.12705e-14	hypothetical protein	#
CNAG_01055		2.66677	up	6.57992e-43	3.03598e-41	phospholipid transporter, phospholipid transporter, variant	#
CNAG_05473		2.66715	up	1.46364e-12	1.74954e-11	hypothetical protein	#
CNAG_05637		2.66856	up	2.46739e-15	3.75315e-14	hypothetical protein	#
CNAG_07002		2.67015	up	0.00195708	0.00683742	hypothetical protein, hypothetical protein, variant	#
CNAG_01236		2.67374	up	3.26745e-39	1.35413e-37	rRNA-processing protein EBP2	#
CNAG_05761		2.67837	up	6.71034e-17	1.12724e-15	cyclin-dependent kinase regulatory subunit CKS1	#
CNAG_03205		2.68225	up	4.45951e-13	5.6015e-12	ATP-dependent RNA helicase ROK1	#
CNAG_06323		2.68287	up	1.35504e-24	3.41027e-23	L-fucose permease	#
CNAG_04909		2.68731	up	3.28962e-09	2.9189e-08	serine carboxypeptidase-like 33	#
CNAG_01081		2.69251	up	1.94608e-22	4.47469e-21	hypothetical protein	#
CNAG_03117		2.70027	up	9.44439e-39	3.89075e-37	hypothetical protein	#
CNAG_00191		2.70518	up	1.35316e-08	1.13932e-07	etoposide-induced protein	#
CNAG_07940		2.70765	up	6.23458e-08	4.89779e-07	hypothetical protein, hypothetical protein, variant	#
CNAG_05371		2.70923	up	3.79749e-19	7.34147e-18	hypothetical protein	#
CNAG_01364		2.71741	up	1.4699e-49	8.01037e-48	guanylate kinase	#
CNAG_02336		2.72238	up	3.67002e-13	4.66916e-12	hypothetical protein	#
CNAG_01960		2.72466	up	0.000263801	0.00117111	efflux protein EncT	#
CNAG_07203		2.72498	up	4.55691e-05	0.000236419	hypothetical protein	#
CNAG_05193		2.72808	up	1.24695e-46	6.29936e-45	endoplasmic reticulum-Golgi intermediate compartment protein 2	#
CNAG_06816		2.72955	up	1.15534e-11	1.29806e-10	hypothetical protein	#
CNAG_03733		2.72995	up	3.82303e-05	0.000202288	hypothetical protein	#
CNAG_07572	ELP3	2.73203	up	1.80271e-30	5.72319e-29	pol II transcription elongation factor	#
CNAG_07739		2.73831	up	2.31024e-18	4.24532e-17	hypothetical protein	#
CNAG_05930		2.74199	up	1.53399e-49	8.29434e-48	hypothetical protein	#
CNAG_06517		2.74913	up	4.01202e-26	1.06797e-24	cytoplasmic protein	#
CNAG_00251		2.75685	up	5.32155e-09	4.65031e-08	hypothetical protein	#
CNAG_02103		2.76356	up	8.34301e-16	1.3005e-14	hypothetical protein, hypothetical protein, variant	#
CNAG_01883		2.76943	up	0.00694624	0.0204574	hypothetical protein	#
CNAG_01283	CAP5	2.77095	up	8.05139e-19	1.51423e-17	hypothetical protein	#
CNAG_00449		2.77334	up	4.33115e-25	1.11435e-23	RNA-binding protein NOB1, RNA-binding protein NOB1, variant	#
CNAG_02872		2.77364	up	0.00697547	0.020526	hypothetical protein	#
CNAG_06693		2.77781	up	6.29722e-54	3.99845e-52	hypothetical protein	#
CNAG_01500		2.7779	up	0.00750343	0.0218469	taurine dioxygenase	#
CNAG_03129		2.78277	up	8.73219e-10	8.26751e-09	transcription factor iiia	#
CNAG_06973		2.78335	up	0.00140022	0.00507911	hypothetical protein	#
CNAG_01755		2.78669	up	2.7159e-07	1.95596e-06	hypothetical protein	#
CNAG_06808	STE3alpha	2.78915	up	0.00676332	0.0200124	pheromone a factor receptor	#
CNAG_06715		2.78974	up	0.00123317	0.0045543	hypothetical protein	#
CNAG_03481		2.79231	up	1.35768e-10	1.38591e-09	ribonuclease P protein component	#
CNAG_04580		2.79458	up	2.11069e-26	5.70628e-25	RNA helicase, RNA helicase, variant	#
CNAG_06535		2.79486	up	2.5103e-17	4.34345e-16	ribosome biogenesis protein UTP30	#
CNAG_06099		2.79613	up	0.00668474	0.0197968	hypothetical protein	#
CNAG_04355		2.7991	up	1.6869e-07	1.24733e-06	hypothetical protein	#
CNAG_07948		2.80256	up	0.00019316	0.000882997	hypothetical protein	#
CNAG_02523		2.80537	up	7.63242e-25	1.94206e-23	hypothetical protein, hypothetical protein, variant	#
CNAG_02821		2.81048	up	1.68542e-08	1.40202e-07	hypothetical protein	#
CNAG_00815	SIT1	2.81153	up	4.50479e-37	1.76812e-35	siderophore iron transporter	#
CNAG_02759		2.81449	up	3.67748e-13	4.67006e-12	hypothetical protein	#
CNAG_07998		2.81547	up	3.5311e-13	4.50068e-12	hypothetical protein	#
CNAG_07917		2.8158	up	9.68482e-12	1.09524e-10	uracil transporter FurD	#
CNAG_06230		2.8236	up	3.34243e-31	1.09635e-29	hypothetical protein	#
CNAG_01056		2.83095	up	0.00586544	0.0177115	hypothetical protein	#
CNAG_00908		2.83267	up	0.0057968	0.0175425	hypothetical protein	#
CNAG_00531	ENA1	2.83387	up	2.10022e-55	1.38434e-53	potassium/sodium efflux P-type ATPase, fungal-type	#
CNAG_04283		2.83833	up	1.03408e-54	6.68865e-53	integral membrane protein, integral membrane protein, variant	#
CNAG_04915		2.84182	up	0.0171004	0.0435919	hypothetical protein	#
CNAG_03504		2.85528	up	1.8167e-13	2.37233e-12	hypothetical protein	#
CNAG_01140		2.85623	up	5.52536e-16	8.69114e-15	ATP-dependent RNA helicase DRS1	#
CNAG_06967		2.85697	up	1.77184e-88	2.07846e-86	phytase	#
CNAG_03867		2.86375	up	0.000881264	0.00340359	hypothetical protein	#
CNAG_04154		2.87324	up	0.0172848	0.0439648	hypothetical protein	#
CNAG_02694		2.87366	up	1.73375e-19	3.4382e-18	hypothetical protein, hypothetical protein, variant	#
CNAG_02176		2.8751	up	2.22269e-61	1.67209e-59	hypothetical protein	#
CNAG_06340		2.87751	up	6.8121e-27	1.8635e-25	pre-rRNA-processing protein TSR4	#
CNAG_00844		2.88524	up	0.000111111	0.000532549	hypothetical protein	#
CNAG_04147		2.8872	up	7.0421e-14	9.46376e-13	ATP-dependent rRNA helicase RRP3	#
CNAG_06912		2.89219	up	4.22284e-13	5.32355e-12	hypothetical protein, hypothetical protein, variant	#
CNAG_05449	CMT1	2.89564	up	1.20413e-134	2.45112e-132	hypothetical protein	#
CNAG_02254		2.8962	up	5.23474e-05	0.000269376	quinate permease	#
CNAG_04677		2.90374	up	6.18669e-37	2.40551e-35	xylitol dehydrogenase	#
CNAG_05678		2.90411	up	7.33921e-23	1.71604e-21	membrane protein	#
CNAG_03602		2.90898	up	1.05387e-64	8.38371e-63	U3 small nucleolar RNA-associated protein 5	#
CNAG_05803		2.92119	up	2.03394e-50	1.14446e-48	exo-beta-1,3-glucanase	#
CNAG_05835	LIV3	2.92351	up	2.90401e-88	3.34978e-86	wor1/pac2 family transcription factor	#
CNAG_00444		2.92772	up	0.0145875	0.0381125	hypothetical protein	#
CNAG_01749		2.93245	up	2.74716e-08	2.24741e-07	hypothetical protein	#
CNAG_04039		2.93724	up	2.21154e-46	1.10914e-44	iron sulfur cluster assembly protein 2, mitochondrial	#
CNAG_04867		2.94012	up	2.87268e-13	3.70238e-12	vacuolar protein	#
CNAG_01898		2.94593	up	3.97812e-28	1.16171e-26	protein MAK11	#
CNAG_00259		2.95263	up	4.64872e-16	7.37931e-15	bud site selection protein	#
CNAG_03021		2.9551	up	0.00064489	0.00257993	hypothetical protein	#
CNAG_03951		2.96526	up	4.83159e-19	9.21196e-18	hypothetical protein	#
CNAG_01812		2.96527	up	9.11346e-47	4.67217e-45	large subunit ribosomal protein L24e	#
CNAG_04365		2.96536	up	3.4574e-36	1.31476e-34	ribosome biogenesis protein MAK21	#
CNAG_05884	KAP123	2.97115	up	2.97879e-30	9.37622e-29	importin beta-4 subunit	#
CNAG_04367		2.97241	up	2.36382e-09	2.13856e-08	hypothetical protein	#
CNAG_00706		2.97451	up	8.34579e-21	1.75034e-19	RNA-binding protein rnp24	#
CNAG_01121		2.97845	up	7.3033e-16	1.14358e-14	hypothetical protein	#
CNAG_02107		2.97866	up	4.62875e-47	2.39071e-45	hypothetical protein	#
CNAG_00691		2.98104	up	8.95837e-41	3.97441e-39	hypothetical protein	#
CNAG_03181		2.98139	up	0.000610775	0.00245766	hypothetical protein, hypothetical protein, variant	#
CNAG_05228		2.98193	up	5.05641e-14	6.84841e-13	U3 small nucleolar ribonucleoprotein LCP5	#
CNAG_02159		2.98274	up	1.54046e-14	2.17582e-13	hypothetical protein	#
CNAG_01070		2.98452	up	0.000609174	0.00245407	class II aldolase/adducin family protein	#
CNAG_07735		3.00296	up	3.08987e-18	5.61285e-17	U3 small nucleolar RNA-associated protein 25	#
CNAG_06657		3.00388	up	6.53674e-40	2.79264e-38	hypothetical protein	#
CNAG_04574		3.00858	up	0.0124748	0.0335423	dolichyl-phosphate mannosyltransferase polypeptide 2, regulatory subunit	#
CNAG_05673		3.01042	up	1.98444e-07	1.45183e-06	GPI inositol-deacylase, GPI inositol-deacylase, variant	#
CNAG_01865		3.01866	up	3.23027e-14	4.48031e-13	hypothetical protein	#
CNAG_02297		3.02063	up	1.40924e-63	1.08371e-61	hypothetical protein	#
CNAG_03921		3.02211	up	8.22074e-28	2.36082e-26	hypothetical protein	#
CNAG_06292		3.02698	up	4.73795e-12	5.48647e-11	sugar transporter, sugar transporter, variant 1, sugar transporter, variant 2	#
CNAG_05974		3.03192	up	0.0125087	0.033608	hypothetical protein	#
CNAG_00029		3.03391	up	3.50936e-12	4.09583e-11	D-3-phosphoglycerate dehydrogenase	#
CNAG_05910		3.03719	up	6.06729e-06	3.65463e-05	hypothetical protein	#
CNAG_07770	FRE1	3.04749	up	8.44397e-50	4.63815e-48	ferric-chelate reductase	#
CNAG_07728		3.05421	up	5.69335e-05	0.000290373	solute carrier family 39 (zinc transporter), member 1/2/3	#
CNAG_00529		3.05438	up	9.25652e-10	8.74002e-09	sulfite transporter	#
CNAG_02156		3.06515	up	3.68378e-65	2.96458e-63	hypothetical protein	#
CNAG_03231		3.07432	up	6.78009e-10	6.4546e-09	hypothetical protein, hypothetical protein, variant	#
CNAG_04084		3.0793	up	0.00947501	0.0265475	hypothetical protein	#
CNAG_05595		3.08303	up	6.93156e-71	6.07257e-69	hypothetical protein	#
CNAG_07662		3.08468	up	0.014678	0.0383199	hypothetical protein	#
CNAG_07698		3.08482	up	0.0027318	0.00916028	hypothetical protein	#
CNAG_01487		3.08546	up	0.00284184	0.00946114	hypothetical protein	#
CNAG_03724		3.0947	up	2.98045e-30	9.37622e-29	ribosomal RNA methyltransferase Nop2	#
CNAG_02846		3.09515	up	9.48746e-11	9.81506e-10	endoplasmic reticulum protein	#
CNAG_05582		3.09791	up	0.00046175	0.00193215	hypothetical protein	#
CNAG_06863		3.10212	up	1.4497e-15	2.2446e-14	hypothetical protein	#
CNAG_02758		3.10367	up	9.25926e-15	1.34066e-13	NADH:flavin oxidoreductase/NADH oxidase	#
CNAG_05627		3.10568	up	2.66599e-19	5.227e-18	ATP-dependent rRNA helicase SPB4	#
CNAG_04858		3.11048	up	1.87085e-24	4.67442e-23	hypothetical protein	#
CNAG_06098		3.11842	up	1.59064e-58	1.12335e-56	glucosamine-6-phosphate deaminase	#
CNAG_05608		3.12021	up	3.29125e-32	1.11116e-30	hypothetical protein	#
CNAG_04053		3.12141	up	2.5664e-22	5.82363e-21	hypothetical protein	#
CNAG_03675		3.12824	up	3.14095e-30	9.83644e-29	pumilio domain-containing protein	#
CNAG_02125		3.13001	up	0.000399214	0.00169299	hypothetical protein, hypothetical protein, variant	#
CNAG_02389		3.13645	up	2.42767e-10	2.42802e-09	AGC protein kinase	#
CNAG_03624		3.1378	up	7.21388e-40	3.06302e-38	pescadillo	#
CNAG_04222		3.14084	up	1.21204e-29	3.6631e-28	protein SDA1	#
CNAG_02479		3.14352	up	4.74844e-12	5.48647e-11	monosaccharide transporter	#
CNAG_03340		3.14765	up	2.49223e-07	1.80237e-06	flavonol synthase	#
CNAG_00888	CNB1	3.15216	up	2.51793e-09	2.26614e-08	calcineurin subunit B	#
CNAG_01925		3.15454	up	1.48976e-12	1.7777e-11	hypothetical protein	#
CNAG_00419		3.15558	up	0.000262086	0.00116425	DNA polymerase beta subunit	#
CNAG_07984		3.16296	up	0.00974373	0.0271374	hypothetical protein	#
CNAG_01601		3.16541	up	1.69125e-50	9.67369e-49	lipase	#
CNAG_04036		3.17067	up	1.91001e-07	1.40033e-06	hypothetical protein	#
CNAG_06882		3.17299	up	4.92128e-16	7.77629e-15	hypothetical protein	#
CNAG_07853		3.17475	up	0.00201485	0.00700391	hypothetical protein	#
CNAG_03897		3.17728	up	2.3248e-23	5.56746e-22	protein BCP1	#
CNAG_03043		3.17915	up	1.76883e-07	1.30234e-06	hypothetical protein, hypothetical protein, variant 1, hypothetical protein, variant 2	#
CNAG_05304		3.19013	up	1.87839e-05	0.000105011	hypothetical protein, hypothetical protein, variant 1, hypothetical protein, variant 2	#
CNAG_02334		3.19229	up	0.00907824	0.0255929	hypothetical protein	#
CNAG_02802		3.19705	up	1.62561e-10	1.64726e-09	inositol/phosphatidylinositol kinase, inositol/phosphatidylinositol kinase, variant	#
CNAG_07008		3.1974	up	2.35455e-17	4.09444e-16	hypothetical protein, hypothetical protein, variant	#
CNAG_00585		3.20351	up	6.60115e-08	5.15912e-07	hypothetical protein	#
CNAG_01713		3.20431	up	1.37298e-78	1.43976e-76	hypothetical protein	#
CNAG_00702		3.20929	up	4.41339e-71	3.91603e-69	hypothetical protein	#
CNAG_06092	CLN1	3.21152	up	9.4511e-54	5.89289e-52	cyclin 1	#
CNAG_02484		3.21204	up	2.41479e-07	1.7537e-06	peptidyl-prolyl cis-trans isomerase, peptidyl-prolyl cis-trans isomerase, variant	#
CNAG_03354		3.21795	up	1.10874e-17	1.95756e-16	hypothetical protein	#
CNAG_03491		3.21882	up	0.00859907	0.0244813	cleavage and polyadenylation specificity factor subunit 5	#
CNAG_03085		3.21989	up	0.000250017	0.00111493	hypothetical protein	#
CNAG_03135		3.24391	up	5.67444e-11	6.04016e-10	hypothetical protein	#
CNAG_03789		3.24631	up	1.22505e-33	4.32581e-32	mRNA turnover protein 4	#
CNAG_04773		3.24851	up	1.53067e-05	8.69052e-05	hypothetical protein	#
CNAG_07799		3.25182	up	1.32307e-41	5.98492e-40	ABC transporter	#
CNAG_05458		3.25303	up	5.64607e-24	1.38569e-22	endo-1,3(4)-beta-glucanase	#
CNAG_04449		3.25502	up	6.23729e-34	2.22517e-32	alpha-1,6-mannosyltransferase	#
CNAG_00010		3.25749	up	1.72956e-31	5.72742e-30	cation transporter	#
CNAG_04947		3.26147	up	1.70864e-05	9.5986e-05	high-affinity nicotinic acid transporter, high-affinity nicotinic acid transporter, variant 1, high-affinity nicotinic acid transporter, variant 2	#
CNAG_06762	GAT204	3.26778	up	1.54815e-133	3.06135e-131	hypothetical protein	#
CNAG_04348		3.27426	up	1.41201e-21	3.08281e-20	chaperone	#
CNAG_06102		3.28235	up	5.63454e-13	7.01379e-12	ADP,ATP carrier protein, ADP,ATP carrier protein, variant 1, ADP,ATP carrier protein, variant 2, ADP,ATP carrier protein, variant 3	#
CNAG_03762		3.28369	up	4.97353e-41	2.22076e-39	AdoMet-dependent rRNA methyltransferase SPB1	#
CNAG_06209		3.28405	up	1.24577e-05	7.15515e-05	hypothetical protein	#
CNAG_03521		3.2888	up	2.29248e-06	1.47046e-05	DNA-directed RNA polymerase III subunit RPC10	#
CNAG_00142		3.29523	up	3.18119e-31	1.04843e-29	hypothetical protein	#
CNAG_00762	DPH1	3.29944	up	4.16256e-19	8.02481e-18	diphthamide biosynthesis protein 1	#
CNAG_05341		3.30964	up	8.94189e-13	1.10119e-11	hypothetical protein	#
CNAG_07881		3.31759	up	4.97866e-09	4.36168e-08	hypothetical protein, hypothetical protein, variant 1, hypothetical protein, variant 2	#
CNAG_02548		3.32012	up	2.31289e-64	1.81904e-62	cobalamin synthesis protein, cobalamin synthesis protein, variant	#
CNAG_03284		3.32403	up	0.000193988	0.000885616	rRNA biogenesis protein RRP36	#
CNAG_02502		3.34176	up	1.4137e-23	3.42105e-22	ATP-dependent RNA helicase DBP3	#
CNAG_01207		3.35795	up	7.32677e-30	2.26378e-28	hypothetical protein	#
CNAG_07864		3.36001	up	4.02007e-37	1.58988e-35	U3 small nucleolar ribonucleoprotein IMP3	#
CNAG_00903		3.37969	up	2.565e-21	5.49608e-20	hypothetical protein, hypothetical protein, variant 1, hypothetical protein, variant 2	#
CNAG_01856		3.39209	up	1.23269e-17	2.17086e-16	hypothetical protein	#
CNAG_04446		3.39572	up	0.00101521	0.00386059	hypothetical protein	#
CNAG_04508		3.40129	up	0.000977387	0.00373317	hypothetical protein	#
CNAG_00887		3.40229	up	3.38522e-08	2.73704e-07	hypothetical protein	#
CNAG_06948		3.40724	up	1.31319e-36	5.07743e-35	essential nuclear protein 1	#
CNAG_05632		3.41085	up	9.41398e-61	6.93129e-59	hypothetical protein	#
CNAG_05597		3.41985	up	4.53718e-40	1.96261e-38	transcription initiation factor TFIID subunit 9/adenylate kinase	#
CNAG_01879		3.42443	up	5.67089e-127	1.03285e-124	cathepsin A (carboxypeptidase C)	#
CNAG_00748		3.42487	up	3.66165e-18	6.61678e-17	hypothetical protein	#
CNAG_03696		3.44467	up	5.76998e-08	4.55868e-07	hypothetical protein	#
CNAG_03996		3.45219	up	8.42875e-277	8.33362e-274	guanosine-diphosphatase	#
CNAG_02558		3.45304	up	0.000983698	0.00375313	hypothetical protein	#
CNAG_01794		3.46266	up	2.91041e-09	2.60582e-08	2-hydroxyacid dehydrogenase	#
CNAG_07505		3.46674	up	4.00351e-06	2.4806e-05	hypothetical protein, hypothetical protein, variant	#
CNAG_03645		3.46807	up	1.11377e-72	1.07061e-70	NET1-associated nuclear protein 1 (U3 small nucleolar RNA-associated protein 17), NET1-associated nuclear protein 1 (U3 small nucleolar RNA-associated protein 17), variant	#
CNAG_04866		3.49056	up	1.10056e-42	5.04435e-41	NAD-dependent histone deacetylase SIR2	#
CNAG_06741		3.49215	up	1.78088e-52	1.08118e-50	ATP-dependent RNA helicase DBP10	#
CNAG_05789		3.50049	up	3.95736e-27	1.08686e-25	hypothetical protein	#
CNAG_02382		3.50482	up	2.79524e-45	1.37204e-43	ribosome biogenesis protein BRX1	#
CNAG_07540		3.50962	up	4.21551e-84	4.70574e-82	hypothetical protein	#
CNAG_04333		3.51161	up	3.28103e-06	2.06249e-05	hypothetical protein	#
CNAG_02489		3.52039	up	5.38391e-16	8.48794e-15	alcohol dehydrogenase, propanol-preferring	#
CNAG_05412		3.53645	up	0.00407248	0.0129174	hypothetical protein	#
CNAG_06815	FAO1	3.54452	up	1.79435e-14	2.51901e-13	putative fatty alcohol oxidase in the mating-type locus	#
CNAG_04975		3.54598	up	0.00338205	0.0110359	hypothetical protein	#
CNAG_01953		3.54829	up	8.16981e-11	8.50274e-10	hypothetical protein	#
CNAG_06009		3.55474	up	6.99493e-106	1.07582e-103	cyclohydrolase	#
CNAG_03122		3.55858	up	2.90372e-21	6.18357e-20	hypothetical protein	#
CNAG_03817		3.56469	up	1.11235e-29	3.37656e-28	cell growth-regulating nucleolar protein	#
CNAG_06115		3.57798	up	2.39531e-24	5.94191e-23	acid phosphatase	#
CNAG_06252		3.58608	up	7.59768e-25	1.94035e-23	hypothetical protein	#
CNAG_00455		3.58724	up	1.44785e-35	5.41654e-34	ubiquitin carboxyl-terminal hydrolase Ubp16	#
CNAG_03233		3.5892	up	1.01871e-23	2.47385e-22	hypothetical protein	#
CNAG_08000		3.59936	up	1.68502e-05	9.47362e-05	hypothetical protein	#
CNAG_06127		3.60507	up	6.14377e-74	6.25309e-72	ribosome biogenesis protein NSA2	#
CNAG_01506		3.60872	up	8.29708e-16	1.29625e-14	hypothetical protein	#
CNAG_02720		3.61161	up	5.04749e-51	2.91114e-49	nuclear GTP-binding protein	#
CNAG_00456		3.61252	up	3.63323e-72	3.39805e-70	hypothetical protein	#
CNAG_05755		3.6146	up	8.74214e-32	2.92292e-30	protein MAK16	#
CNAG_03224		3.61571	up	3.15728e-05	0.000169919	hypothetical protein	#
CNAG_02497		3.61608	up	1.41334e-13	1.85964e-12	thaumatin family protein, thaumatin family protein, variant	#
CNAG_02328		3.61611	up	1.09486e-21	2.39794e-20	pre-rRNA-processing protein TSR1	#
CNAG_08028		3.61676	up	1.24265e-46	6.29936e-45	hypothetical protein	#
CNAG_02934		3.62011	up	8.68036e-92	1.0923e-89	hypothetical protein, hypothetical protein, variant	#
CNAG_02672		3.62147	up	1.44644e-56	9.91173e-55	nonsense-mediated mRNA decay protein 3	#
CNAG_07520		3.64976	up	4.06014e-16	6.50468e-15	endopeptidase, endopeptidase, variant 1, endopeptidase, variant 2	#
CNAG_05003		3.65415	up	4.00224e-52	2.38789e-50	hypothetical protein	#
CNAG_06391		3.66793	up	0.00245435	0.00835132	hypothetical protein	#
CNAG_01611	LIV8	3.66949	up	1.10906e-37	4.46269e-36	infection related protein of unknown function	#
CNAG_07878		3.66987	up	7.35085e-64	5.71632e-62	nucleolar complex protein 2	#
CNAG_07362		3.68879	up	3.69414e-50	2.06186e-48	nucleolin	#
CNAG_03842		3.69103	up	2.21319e-05	0.000122149	hypothetical protein	#
CNAG_01992		3.69173	up	5.83425e-08	4.6042e-07	hypothetical protein	#
CNAG_03352		3.69294	up	0.000975755	0.00372899	hypothetical protein	#
CNAG_06382		3.69653	up	2.19479e-27	6.10611e-26	beta-transducin repeat containing protein	#
CNAG_03064		3.71107	up	1.07988e-43	5.11906e-42	nucleolar protein 16	#
CNAG_05289		3.71393	up	0.000359161	0.00153917	hypothetical protein	#
CNAG_05312		3.72982	up	1.76003e-55	1.17127e-53	hypothetical protein	#
CNAG_00332		3.73246	up	4.31315e-35	1.57943e-33	hypothetical protein	#
CNAG_02987		3.73488	up	0.00285054	0.00948488	hypothetical protein	#
CNAG_03090		3.73597	up	3.24691e-08	2.63137e-07	hypothetical protein	#
CNAG_07611		3.74094	up	0.000444367	0.00186731	hypothetical protein	#
CNAG_07855		3.74782	up	3.42736e-76	3.54041e-74	midasin	#
CNAG_04589		3.75383	up	1.54514e-71	1.38882e-69	hypothetical protein	#
CNAG_08015		3.7605	up	1.04178e-17	1.84404e-16	hypothetical protein	#
CNAG_06126		3.76194	up	1.98936e-16	3.232e-15	Pin2-interacting protein X1	#
CNAG_06932		3.76355	up	4.34661e-08	3.48181e-07	sugar transporter	#
CNAG_03635		3.76925	up	2.89877e-05	0.00015686	hypothetical protein	#
CNAG_06007		3.77246	up	6.12753e-30	1.90173e-28	U3 small nucleolar RNA-associated protein 23	#
CNAG_03055		3.77326	up	1.23087e-93	1.57757e-91	bud site selection protein 20	#
CNAG_04873		3.78524	up	1.14806e-19	2.3031e-18	hypothetical protein, hypothetical protein, variant	#
CNAG_02499		3.7854	up	0.00322465	0.0105822	hypothetical protein	#
CNAG_02521		3.79207	up	0.000288212	0.00127133	hypothetical protein	#
CNAG_03630		3.79402	up	1.37271e-12	1.65552e-11	hypothetical protein	#
CNAG_04298		3.79505	up	7.99935e-36	3.00889e-34	nucleolar complex protein 3	#
CNAG_06493		3.81009	up	1.00903e-89	1.24705e-87	hypothetical protein	#
CNAG_04337		3.81131	up	0.00176136	0.00622912	cation diffusion facilitator	#
CNAG_02848		3.81338	up	3.20019e-22	7.14467e-21	hypothetical protein	#
CNAG_05154		3.82517	up	1.44325e-104	2.12527e-102	membrane fraction protein	#
CNAG_05746		3.84536	up	2.36004e-14	3.29311e-13	Swi5-dependent recombination DNA repair protein 1, Swi5-dependent recombination DNA repair protein 1, variant	#
CNAG_03443		3.86434	up	0.00300131	0.00992455	hypothetical protein	#
CNAG_03222		3.8644	up	2.15499e-37	8.62119e-36	RNA lariat debranching enzyme	#
CNAG_08003		3.86586	up	3.85156e-21	8.10233e-20	hypothetical protein	#
CNAG_01553		3.86598	up	9.6823e-144	2.23371e-141	CORD and CS domain-containing protein	#
CNAG_00974		3.86712	up	0.000256899	0.00114267	beta-lactamase	#
CNAG_06000		3.86872	up	4.65074e-210	1.8934e-207	glycoprotein	#
CNAG_00897	SKN1	3.86996	up	4.18256e-81	4.52304e-79	putative glucosidase	#
CNAG_00003		3.88201	up	1.4097e-31	4.69065e-30	drug transporter	#
CNAG_07519		3.88341	up	2.23382e-69	1.8854e-67	hypothetical protein	#
CNAG_04877		3.89084	up	3.36909e-40	1.46651e-38	hypothetical protein	#
CNAG_05438		3.89451	up	9.92398e-30	3.03911e-28	hypothetical protein	#
CNAG_06309		3.89459	up	4.68154e-31	1.52117e-29	hypothetical protein	#
CNAG_05161		3.89862	up	1.1539e-52	7.06736e-51	hypothetical protein, hypothetical protein, variant	#
CNAG_00849		3.90447	up	1.07878e-25	2.8497e-24	hypothetical protein	#
CNAG_01608		3.90561	up	3.97623e-37	1.58158e-35	nuclear GTP-binding protein, nuclear GTP-binding protein, variant	#
CNAG_07911		3.9195	up	4.12849e-62	3.13992e-60	streptomycin biosynthesis protein StrI	#
CNAG_06653		3.92315	up	6.82143e-19	1.29345e-17	hypothetical protein, hypothetical protein, variant	#
CNAG_07858		3.94943	up	0.00155606	0.00557137	hypothetical protein	#
CNAG_05037		3.96038	up	0.00110399	0.00416388	hypothetical protein	#
CNAG_04216		3.96363	up	0.00113912	0.00427773	hypothetical protein	#
CNAG_03764		3.96696	up	1.9857e-16	3.232e-15	integral membrane protein	#
CNAG_01379		3.97067	up	4.77133e-56	3.23749e-54	hypothetical protein	#
CNAG_06844		3.97255	up	0.000156488	0.000728346	hypothetical protein	#
CNAG_02735		3.98023	up	1.33809e-13	1.77073e-12	hypothetical protein	#
CNAG_05528		4.01149	up	0.000134369	0.000634355	hypothetical protein	#
CNAG_04311		4.01172	up	8.12695e-54	5.11333e-52	charged multivesicular body protein 7	#
CNAG_01048		4.02299	up	7.60849e-23	1.77301e-21	hypothetical protein, hypothetical protein, variant	#
CNAG_07673		4.04552	up	0.000952755	0.00364713	hypothetical protein	#
CNAG_05358		4.05029	up	2.45987e-45	1.21605e-43	hypothetical protein	#
CNAG_05392	ZAP104	4.05032	up	2.08763e-59	1.50505e-57	specific RNA polymerase II transcription factor	#
CNAG_05281		4.05364	up	1.22642e-11	1.3757e-10	hypothetical protein, hypothetical protein, variant	#
CNAG_03137		4.06338	up	8.65919e-89	1.05141e-86	CMGC/CDK protein kinase	#
CNAG_04707		4.07435	up	4.99214e-14	6.77462e-13	hypothetical protein	#
CNAG_03179		4.07535	up	1.36435e-40	5.97636e-39	hypothetical protein	#
CNAG_04655		4.07765	up	7.61699e-57	5.27172e-55	rab family protein	#
CNAG_00433		4.08666	up	6.89993e-74	6.92093e-72	hypothetical protein	#
CNAG_04060		4.0879	up	1.55046e-12	1.84377e-11	hypothetical protein	#
CNAG_05640		4.09886	up	3.92244e-84	4.45036e-82	metal iron transporter	#
CNAG_07896		4.10381	up	0.000133965	0.000632884	hypothetical protein	#
CNAG_02899		4.10846	up	1.10052e-08	9.35714e-08	hypothetical protein	#
CNAG_00125	CRG1	4.11307	up	1.97627e-25	5.14201e-24	regulator of G-protein signaling	#
CNAG_07592		4.11391	up	9.21795e-05	0.000452785	hypothetical protein	#
CNAG_03302		4.12001	up	8.87756e-61	6.60662e-59	protein LTV1	#
CNAG_00795	CFL1	4.12905	up	0.00138714	0.00503956	hypothetical protein	#
CNAG_03964		4.13693	up	5.71351e-43	2.65391e-41	zinc knuckle family protein	#
CNAG_01742	AQY1	4.1411	up	1.39005e-141	3.1034e-139	aquaporin-associated protein	#
CNAG_02797	CPL1	4.14817	up	1.18539e-44	5.77754e-43	putative secreted protein	#
CNAG_06186		4.15481	up	5.35168e-113	9.25974e-111	hypothetical protein, hypothetical protein, variant 1, hypothetical protein, variant 2	#
CNAG_07854		4.16473	up	8.20575e-05	0.000407111	hypothetical protein	#
CNAG_06233		4.16828	up	1.5177e-14	2.14806e-13	hypothetical protein	#
CNAG_07413	NOG2	4.17528	up	3.44953e-109	5.68434e-107	putative nucleolar gtp-binding protein	#
CNAG_07743		4.20482	up	1.32792e-16	2.19869e-15	hypothetical protein	#
CNAG_07456		4.21908	up	4.93774e-15	7.33349e-14	hypothetical protein, hypothetical protein, variant	#
CNAG_01349		4.22463	up	1.60294e-14	2.25946e-13	hypothetical protein	#
CNAG_07697		4.26268	up	2.9342e-08	2.39477e-07	hypothetical protein	#
CNAG_00601	CEL1	4.26692	up	7.24201e-84	7.95587e-82	putative glycosyl hydrolase	#
CNAG_02220		4.27931	up	2.84908e-73	2.77725e-71	hypothetical protein	#
CNAG_07759		4.29396	up	0.00112353	0.00423064	hypothetical protein	#
CNAG_07725		4.31291	up	0.000467467	0.00195371	HMG box factor	#
CNAG_00751		4.32819	up	0.000486647	0.00202288	hypothetical protein	#
CNAG_07496		4.33259	up	0.00514111	0.0158	hypothetical protein	#
CNAG_00653		4.38381	up	2.71665e-70	2.32123e-68	hypothetical protein, hypothetical protein, variant 1, hypothetical protein, variant 2	#
CNAG_01689		4.40514	up	7.15303e-07	4.91132e-06	hypothetical protein, hypothetical protein, variant	#
CNAG_07648		4.40902	up	0.000679467	0.00269644	hypothetical protein	#
CNAG_03614		4.41799	up	1.60845e-10	1.63227e-09	hypothetical protein	#
CNAG_05129		4.43188	up	0.00245556	0.00835132	hypothetical protein	#
CNAG_05265		4.43851	up	8.52618e-59	6.08347e-57	hypothetical protein	#
CNAG_00654	SRX1	4.45039	up	1.2582e-110	2.12391e-108	sulfiredoxin	#
CNAG_01810		4.45421	up	8.48609e-11	8.79225e-10	DNA-directed RNA polymerase I subunit RPA12	#
CNAG_03894	PDR802	4.47171	up	4.33413e-72	3.99953e-70	hypothetical protein	#
CNAG_00864	ITR2	4.49567	up	4.12575e-102	5.71086e-100	myo-inositol transporter	#
CNAG_05778		4.52233	up	1.4662e-105	2.206e-103	WSC domain-containing protein, WSC domain-containing protein, variant	#
CNAG_00679		4.53067	up	1.52468e-39	6.43434e-38	hypothetical protein	#
CNAG_02192		4.54395	up	0.000287835	0.00127048	hypothetical protein	#
CNAG_06907		4.5774	up	2.73423e-05	0.00014842	hypothetical protein, hypothetical protein, variant	#
CNAG_06662		4.58862	up	2.58483e-07	1.86544e-06	hypothetical protein	#
CNAG_06034		4.60862	up	1.14432e-103	1.64996e-101	allantoin permease	#
CNAG_07486		4.62057	up	8.0201e-71	6.93839e-69	hypothetical protein	#
CNAG_00033		4.66936	up	0.000535581	0.00219464	hypothetical protein	#
CNAG_03384		4.67818	up	0.000501178	0.0020752	hypothetical protein	#
CNAG_04072		4.68174	up	4.59702e-103	6.49306e-101	60S ribosome subunit biogenesis protein nip7	#
CNAG_03830		4.68963	up	2.71816e-21	5.8063e-20	hypothetical protein, hypothetical protein, variant 1, hypothetical protein, variant 2	#
CNAG_04143		4.75593	up	7.2669e-18	1.29624e-16	hypothetical protein, hypothetical protein, variant	#
CNAG_01681	FCY2	4.76658	up	4.51175e-96	6.12271e-94	cytosine permease	#
CNAG_02044		4.78032	up	1.75598e-48	9.34856e-47	hypothetical protein	#
CNAG_06424		4.78819	up	6.80718e-288	7.85208e-285	claudin family protein	#
CNAG_06033		4.79482	up	1.7151e-94	2.28274e-92	pfkB family carbohydrate kinase superfamily	#
CNAG_06758		4.82588	up	2.37232e-44	1.14817e-42	efflux protein	#
CNAG_07399		4.84008	up	1.03085e-32	3.56726e-31	hypothetical protein	#
CNAG_06916		4.86527	up	2.07919e-57	1.45354e-55	hypothetical protein	#
CNAG_02155		4.92939	up	4.14853e-08	3.327e-07	hypothetical protein	#
CNAG_05885		4.93856	up	1.46147e-14	2.07271e-13	hypothetical protein	#
CNAG_06562		4.97565	up	3.75087e-21	7.91457e-20	hypothetical protein	#
CNAG_04756		4.97804	up	4.58254e-107	7.37575e-105	hypothetical protein	#
CNAG_03461		4.99395	up	8.64721e-27	2.35619e-25	hypothetical protein, hypothetical protein, variant	#
CNAG_05586		5.01704	up	1.47559e-32	5.0308e-31	hypothetical protein, hypothetical protein, variant	#
CNAG_02777	PHO84	5.04014	up	1.1491e-59	8.37151e-58	phosphate:H symporter, phosphate:H symporter, variant	#
CNAG_06468		5.04235	up	8.61357e-149	2.05567e-146	nucleolar GTP-binding protein	#
CNAG_06785		5.08423	up	3.1438e-140	6.79945e-138	kynurenine 3-monooxygenase	#
CNAG_01971		5.12449	up	0.000114431	0.000547322	hypothetical protein	#
CNAG_01841	GLN3	5.12463	up	8.42499e-56	5.6611e-54	hypothetical protein	#
CNAG_05757		5.19246	up	2.18606e-65	1.77996e-63	hypothetical protein	#
CNAG_06242	CFT1	5.2113	up	3.07561e-128	5.75305e-126	major iron permease	#
CNAG_01187		5.23709	up	2.84164e-26	7.65252e-25	ribosome production factor 2	#
CNAG_00919		5.28695	up	1.06494e-177	3.50973e-175	carboxypeptidase D	#
CNAG_03617	CLP1	5.32203	up	3.63508e-05	0.000192932	clampless protein essential for dikaryotic filament formation	#
CNAG_04454		5.33872	up	2.19436e-39	9.14889e-38	hypothetical protein	#
CNAG_01193		5.34675	up	1.6314e-33	5.73144e-32	hypothetical protein, hypothetical protein, variant	#
CNAG_01551	GAT201	5.35337	up	3.01269e-139	6.31844e-137	hypothetical protein	#
CNAG_04753		5.35463	up	4.80889e-72	4.37925e-70	gluconolactonase	#
CNAG_06623		5.36229	up	5.14784e-121	9.13543e-119	inositol oxygenase	#
CNAG_05264		5.36562	up	1.47713e-156	3.65116e-154	alpha-amylase AmyA, alpha-amylase AmyA, variant	#
CNAG_00895	ZIP1	5.38221	up	1.51076e-168	4.35664e-166	zinc ion transporter	#
CNAG_01171		5.38751	up	3.02517e-26	8.11521e-25	hypothetical protein	#
CNAG_06341		5.39108	up	1.2458e-73	1.23174e-71	hypothetical protein	#
CNAG_07869		5.40305	up	3.43826e-25	8.91242e-24	hypothetical protein	#
CNAG_06241	CFO1	5.41311	up	6.93683e-250	4.36452e-247	ferroxidase/laccase	#
CNAG_07380		5.4173	up	0.00580623	0.0175633	hypothetical protein	#
CNAG_05160		5.4461	up	3.69114e-28	1.08247e-26	hypothetical protein	#
CNAG_03107		5.54279	up	2.51646e-05	0.000137137	hypothetical protein	#
CNAG_02040		5.54731	up	1.66301e-80	1.77072e-78	hypothetical protein	#
CNAG_01993		5.83579	up	8.17093e-15	1.18805e-13	hypothetical protein	#
CNAG_05159		5.8396	up	2.82823e-130	5.43727e-128	hypothetical protein, hypothetical protein, variant	#
CNAG_07713		5.89931	up	4.00877e-07	2.82245e-06	hypothetical protein	#
CNAG_01796		5.94682	up	0	0	hypothetical protein, hypothetical protein, variant 1, hypothetical protein, variant 2, hypothetical protein, variant 3	#
CNAG_04735	MEP1	5.95442	up	8.4e-231	4.1526e-228	metalloproteinase	#
CNAG_00164		6.01767	up	1.4559e-88	1.73729e-86	hypothetical protein	#
CNAG_00979	CTR4	6.11724	up	1.35332e-208	5.2035e-206	solute carrier family 31 (copper transporter), member 1, solute carrier family 31 (copper transporter), member 1, variant 1, solute carrier family 31 (copper transporter), member 1, variant 2, solute carrier family 31 (copper transporter), member 1, variant 3	#
CNAG_03644	CAS3	6.13191	up	7.68862e-171	2.3136e-168	hypothetical protein	#
CNAG_03204		6.22896	up	1.39521e-206	5.08224e-204	hypothetical protein	#
CNAG_02381		6.23396	up	1.63851e-16	2.68088e-15	hypothetical protein	#
CNAG_00331		6.30437	up	1.01158e-48	5.42725e-47	anon-23da protein	#
CNAG_04865		6.31071	up	4.08529e-67	3.36599e-65	mannitol dehydrogenase	#
CNAG_05266		6.31418	up	3.22281e-94	4.2085e-92	membrane protein, membrane protein, variant	#
CNAG_03474		6.32729	up	9.12798e-14	1.21724e-12	efflux protein EncT	#
CNAG_03833		6.34434	up	6.4118e-08	5.01992e-07	hypothetical protein	#
CNAG_07784		6.35122	up	5.00971e-161	1.33355e-158	hypothetical protein	#
CNAG_00306		6.4105	up	7.9618e-231	4.1526e-228	hypothetical protein	#
CNAG_05870		6.61764	up	3.44323e-213	1.48941e-210	hypothetical protein, hypothetical protein, variant	#
CNAG_02118		6.71772	up	1.39112e-203	4.81397e-201	hypothetical protein	#
CNAG_02660		6.73155	up	3.53124e-14	4.87818e-13	hypothetical protein	#
CNAG_00165		6.81261	up	1.49713e-174	4.70982e-172	methylthioadenosine phosphorylase	#
CNAG_05147		6.99233	up	0	0	hypothetical protein	#
CNAG_04874		7.1291	up	1.93109e-160	4.95002e-158	hypothetical protein	#
CNAG_05427	GPG1	7.13078	up	4.98022e-06	3.04758e-05	guanine nucleotide-binding protein subunit gamma	#
CNAG_05305		7.26728	up	8.94859e-31	2.86728e-29	hypothetical protein	#
CNAG_06389		7.38068	up	6.14252e-167	1.70049e-164	hypothetical protein	#
CNAG_06917		7.65727	up	3.20393e-262	2.21744e-259	thiol-specific antioxidant protein 3	#
CNAG_06346	BLP1	7.65766	up	0	0	hypothetical protein	#
CNAG_04736		7.80729	up	5.30505e-274	4.58953e-271	hypothetical protein	#
CNAG_04280		7.8236	up	5.12078e-52	3.00347e-50	hypothetical protein	#
CNAG_00699		7.90539	up	0	0	transmembrane receptor	#
CNAG_07811		7.98023	up	0.00361614	0.0116895	hypothetical protein	#
CNAG_03848		8.03394	up	3.69331e-269	2.84016e-266	glutathione transferase, glutathione transferase, variant	#
CNAG_05641		8.12072	up	1.33326e-72	1.26404e-70	hypothetical protein, hypothetical protein, variant	#
CNAG_03398	ZIP2	8.46508	up	1.24183e-243	7.16227e-241	zinc ion transporter	#
CNAG_05075		8.9615	up	1.32653e-218	6.1206e-216	solute carrier family 20 (sodium-dependent phosphate transporter)	#
CNAG_05079		9.07953	up	4.04634e-06	2.5049e-05	hypothetical protein	#
CNAG_06312		10.6762	up	4.8925e-38	1.99182e-36	hypothetical protein, hypothetical protein, variant	#
CNAG_01653	CIG1	11.9894	up	0	0	cytokine inducing-glycoprotein	#
CNAG_01980		12.653	up	1.03849e-37	4.20316e-36	hypothetical protein	#

## Sheet: monkey lungs
Table S3. Differentially expressed C. neoformans genes in the mouse and monkey lungs.
Gene ID	Gene name	log2FoldChange (Infected/Uninfected)	Regulation	pvalue	padj	Description
CNAG_05258	SMG1	-6.44261	down	6.33306e-08	1.56584e-06	glucose-methanol-choline oxidoreductase	#
CNAG_02692		-5.7474	down	1.16016e-06	2.14339e-05	nitroreductase	#
CNAG_03759		-5.45057	down	1.45425e-05	0.000204486	conidiation-specific protein 6	#
CNAG_03858		-5.32753	down	7.04559e-06	0.000110001	hypothetical protein	#
CNAG_07522		-5.16542	down	1.2608e-05	0.000182295	hypothetical protein	#
CNAG_03902		-5.14878	down	1.27013e-05	0.000183245	transcriptional regulatory protein	#
CNAG_04168		-4.89769	down	3.38104e-05	0.000434117	histone H1/5	#
CNAG_03232		-4.86621	down	3.76542e-05	0.000473418	lactamase	#
CNAG_02076		-4.83221	down	4.17342e-05	0.000516898	leukotriene A-4 hydrolase/aminopeptidase	#
CNAG_03153	SEC14-1	-4.45265	down	0.000166099	0.00173972	sec14 cytosolic factor, sec14 cytosolic factor, variant	#
CNAG_04105		-4.43678	down	4.53699e-26	6.0351e-24	hypothetical protein	#
CNAG_01464	FHB1	-4.3993	down	5.46155e-37	9.55916e-35	nitric oxide dioxygenase	#
CNAG_02864		-4.28044	down	0.000291416	0.00285451	hypothetical protein	#
CNAG_03333		-4.16496	down	1.73887e-08	4.839e-07	cytoplasmic protein	#
CNAG_04656		-4.16145	down	0.00042086	0.00389852	arginine-tRNA-protein transferase, arginine-tRNA-protein transferase, variant	#
CNAG_07771		-4.15549	down	0.000440147	0.00403246	peptidase	#
CNAG_02362		-4.12583	down	5.81108e-05	0.000684061	hypothetical protein	#
CNAG_04962		-4.09989	down	0.000520101	0.00465571	hypothetical protein	#
CNAG_05383		-4.04536	down	0.000675349	0.00578833	hypothetical protein, hypothetical protein, variant 1, hypothetical protein, variant 2	#
CNAG_04141		-4.0239	down	0.000690178	0.00587004	vacuolar protein	#
CNAG_04183		-3.94251	down	2.67945e-06	4.58124e-05	hypothetical protein	#
CNAG_04245	CHI22	-3.91834	down	0.000132102	0.00142401	endochitinase	#
CNAG_05650	UBP5	-3.89251	down	0.000976215	0.00784155	ubiquitin carboxyl-terminal hydrolase 7, ubiquitin carboxyl-terminal hydrolase 7, variant	#
CNAG_03725		-3.88202	down	0.00102004	0.00809578	dTDP-4-dehydrorhamnose reductase	#
CNAG_06905		-3.85109	down	0.000176455	0.00182804	cytoplasmic protein	#
CNAG_06093	SFB2	-3.83225	down	0.00117242	0.00909888	protein transporter SEC24	#
CNAG_02361		-3.82949	down	0.00121744	0.00936089	MFS transporter, ACS family, pantothenate transporter	#
CNAG_01896		-3.82271	down	6.0816e-22	6.42043e-20	alcohol dehydrogenase (NADP+)	#
CNAG_04265		-3.81744	down	0.000188822	0.00193537	hypothetical protein	#
CNAG_03874		-3.78295	down	0.0013677	0.0102554	oxidoreductase	#
CNAG_05825		-3.78173	down	0.00135612	0.0101916	minichromosome maintenance protein 7 (cell division control protein 47)	#
CNAG_02000		-3.76654	down	0.00140684	0.0104781	short-chain dehydrogenase	#
CNAG_05899		-3.71047	down	0.00165808	0.0121319	pyrroline-5-carboxylate reductase	#
CNAG_00848		-3.70859	down	1.64276e-19	1.43763e-17	hypothetical protein, hypothetical protein, variant 1, hypothetical protein, variant 2	#
CNAG_02852		-3.70404	down	1.06679e-05	0.000157323	4-aminobutyrate transaminase	#
CNAG_02175		-3.70162	down	0.00171694	0.0124529	5'-3' exoribonuclease 1	#
CNAG_00016		-3.69924	down	0.00171509	0.0124529	U6 snRNA-associated Sm-like protein LSm5	#
CNAG_00269		-3.65382	down	0.00212967	0.0149257	sorbitol dehydrogenase	#
CNAG_05109		-3.65239	down	9.91487e-07	1.86282e-05	CBS and PB1 domain-containing protein, CBS and PB1 domain-containing protein, variant	#
CNAG_06946		-3.63728	down	0.00205032	0.0144456	hypothetical protein	#
CNAG_03465	LAC1	-3.6313	down	0.00209896	0.0147415	laccase	#
CNAG_04101		-3.61646	down	0.00221249	0.0153125	hypothetical protein	#
CNAG_01239	CDA3	-3.61186	down	0.00219998	0.0152576	chitin deacetylase	#
CNAG_05804		-3.61015	down	0.00224402	0.0155145	nuclear pore complex protein Nup188	#
CNAG_02455		-3.60909	down	0.0022617	0.0156043	choline transporter	#
CNAG_06541		-3.60583	down	0.00394613	0.0248304	hypothetical protein, hypothetical protein, variant	#
CNAG_02680		-3.60071	down	0.0022944	0.0158135	VPS15 protein kinase	#
CNAG_05980		-3.59438	down	0.00241567	0.0164617	large subunit ribosomal protein L7/L12	#
CNAG_03187		-3.59151	down	0.00233577	0.0159904	protoporphyrinogen oxidase	#
CNAG_01846		-3.57783	down	9.2144e-07	1.74601e-05	flavoprotein	#
CNAG_03626		-3.57036	down	0.00253414	0.0171286	actin cross-linking protein	#
CNAG_01027		-3.56387	down	0.000487939	0.00440337	succinate-semialdehyde dehydrogenase (NADP+)	#
CNAG_04176		-3.55184	down	0.002657	0.0178682	hypothetical protein	#
CNAG_07856		-3.4923	down	0.00315358	0.0207668	hypothetical protein	#
CNAG_06745		-3.48576	down	4.64449e-20	4.17439e-18	histone H3	#
CNAG_07323		-3.48554	down	0.00319481	0.0209967	cactin	#
CNAG_04264		-3.4739	down	0.00323989	0.0212418	ubiquinone biosynthesis monooxygenase COQ6	#
CNAG_05703	LRG1	-3.45377	down	0.00342981	0.0221511	rho GTPase-activating protein	#
CNAG_00275		-3.45177	down	0.00343928	0.0221869	hypothetical protein	#
CNAG_04657		-3.41258	down	0.00398308	0.0250155	short-chain dehydrogenase	#
CNAG_00626		-3.40501	down	1.12718e-10	4.23552e-09	hypothetical protein	#
CNAG_01988	PHY1	-3.39052	down	0.00404067	0.025262	two-component-like sensor kinase/putative phytochrome	#
CNAG_05391		-3.37837	down	0.00426142	0.0263898	centromere protein C	#
CNAG_02691		-3.35433	down	0.00478376	0.0289507	hypothetical protein	#
CNAG_05121		-3.35354	down	0.00448787	0.0275358	hypothetical protein	#
CNAG_02975		-3.35075	down	0.0045163	0.0276847	hypothetical protein	#
CNAG_04083		-3.32238	down	0.00491105	0.0295329	dolichol kinase, dolichol kinase, variant	#
CNAG_03128		-3.32043	down	0.00493921	0.0296486	gamma-glutamyltransferase, gamma-glutamyltransferase, variant	#
CNAG_02262		-3.31791	down	0.0052007	0.030939	ATP-binding cassette transporter	#
CNAG_03528		-3.31583	down	0.0049562	0.0297238	AP-2 complex subunit alpha	#
CNAG_02539		-3.30655	down	0.00508842	0.0304071	AAT family amino acid transporter	#
CNAG_04730	GPR4	-3.30588	down	0.00516894	0.0307777	hypothetical protein	#
CNAG_02683		-3.29083	down	0.0053144	0.0315021	hypothetical protein	#
CNAG_04575		-3.27396	down	0.0055035	0.032422	G2/mitotic-specific cyclin 1/2	#
CNAG_07631		-3.26956	down	0.00556681	0.0326639	hypothetical protein	#
CNAG_07925		-3.26954	down	9.48998e-05	0.00107343	nucleoprotein TPR	#
CNAG_05809	HEM15	-3.2639	down	0.00143677	0.0106651	ferrochelatase	#
CNAG_02825		-3.23274	down	0.0061582	0.0354162	argininosuccinate lyase	#
CNAG_07453		-3.22732	down	0.00631159	0.0360742	hypothetical protein	#
CNAG_00426		-3.2235	down	0.00644019	0.0366727	UBA/TS-N domain-containing protein	#
CNAG_07745	MPD1	-3.21849	down	5.51465e-12	2.38168e-10	mannitol-1-phosphate dehydrogenase	#
CNAG_06136		-3.21514	down	0.00682262	0.0380681	hypothetical protein	#
CNAG_04022		-3.21513	down	0.00649174	0.0368087	translation initiation factor	#
CNAG_03082		-3.21271	down	0.00693689	0.0386409	cupin domain-containing protein	#
CNAG_02431		-3.20833	down	0.00670233	0.0376229	TatD DNase	#
CNAG_00250		-3.20246	down	0.00669325	0.0376229	hypothetical protein	#
CNAG_04539		-3.18693	down	0.00705328	0.0390053	mitochondrial protein required for respiration	#
CNAG_04326		-3.18263	down	1.46638e-07	3.32862e-06	malate dehydrogenase (oxaloacetate-decarboxylating)	#
CNAG_06267		-3.1757	down	0.000180307	0.00185926	hypothetical protein	#
CNAG_02038		-3.16575	down	0.00199706	0.0141845	hypothetical protein	#
CNAG_03190	CCR4	-3.15497	down	0.00761713	0.0415599	glucose-repressible alcohol dehydrogenase transcriptional effector	#
CNAG_00612		-3.15013	down	0.00759332	0.041464	DNA excision repair protein ERCC-3	#
CNAG_07551		-3.15001	down	0.00775334	0.0421647	hypothetical protein, hypothetical protein, variant	#
CNAG_02216		-3.13308	down	0.0080091	0.0432374	hypothetical protein	#
CNAG_06404		-3.1305	down	2.14283e-11	8.74354e-10	hypothetical protein	#
CNAG_06219		-3.12192	down	0.00842488	0.0448271	amyloid beta protein binding protein 1	#
CNAG_04570		-3.11568	down	0.00825868	0.044213	hypothetical protein	#
CNAG_02120		-3.1002	down	0.00861815	0.0456364	TIGR01456 family HAD hydrolase	#
CNAG_02751		-3.07978	down	1.87878e-13	9.53873e-12	short-chain dehydrogenase	#
CNAG_03450		-3.07017	down	0.00936231	0.0487617	ATP-binding cassette transporter	#
CNAG_07338		-3.0691	down	0.00939142	0.0488751	N-acyl-phosphatidylethanolamine-hydrolyzing phospholipase D	#
CNAG_06456		-3.06706	down	0.00935672	0.0487617	hypothetical protein	#
CNAG_05838	RGD1	-3.05904	down	0.00955941	0.0495168	rho GTPase activating protein (GAP) homolog	#
CNAG_04659		-3.05323	down	1.22275e-20	1.16179e-18	pyruvate decarboxylase	#
CNAG_02182	GRE2	-3.04049	down	1.41131e-16	1.00475e-14	D-lactaldehyde dehydrogenase	#
CNAG_06290		-3.03839	down	3.98188e-08	1.02649e-06	high-affinity glucose transporter SNF3, high-affinity glucose transporter SNF3, variant	#
CNAG_04284		-3.03686	down	0.000294157	0.00286904	hypothetical protein	#
CNAG_04189		-3.03634	down	6.0206e-15	3.57527e-13	succinate dehydrogenase [ubiquinone] flavoprotein subunit, mitochondrial	#
CNAG_00046		-3.01245	down	0.00321155	0.0210859	26S proteasome regulatory subunit N8	#
CNAG_04373		-3.00931	down	0.000332363	0.00319443	alginate lyase	#
CNAG_06829	ERG1	-2.99969	down	0.000352442	0.0033583	squalene monooxygenase	#
CNAG_03983		-2.98712	down	1.51913e-13	7.89357e-12	oxidoreductase	#
CNAG_00407		-2.98128	down	1.79151e-16	1.25424e-14	glyoxal oxidase	#
CNAG_01485		-2.97429	down	0.00373176	0.0237384	D-lactate dehydrogenase (cytochrome)	#
CNAG_00984		-2.97118	down	1.1571e-12	5.34436e-11	glucose and ribitol dehydrogenase	#
CNAG_03418		-2.95354	down	0.0038961	0.0246087	exportin-1	#
CNAG_06096		-2.95172	down	0.00400272	0.0251152	tricarboxylate carrier	#
CNAG_06923	XFP2	-2.94516	down	1.52578e-19	1.35306e-17	xylulose 5-phosphate/fructose 6-phosphate phosphoketolase	#
CNAG_00700		-2.91884	down	0.00446414	0.0274176	phosphoribosylaminoimidazolecarboxamide formyltransferase/IMP cyclohydrolase	#
CNAG_03565		-2.91499	down	7.92428e-06	0.000120605	plasma-membrane proton-efflux P-type ATPase	#
CNAG_02896	ERG130	-2.9095	down	0.000513328	0.00460127	hydroxymethylglutaryl-CoA synthase	#
CNAG_05997		-2.90122	down	0.000530354	0.00472839	hypothetical protein	#
CNAG_02994		-2.89994	down	3.50543e-08	9.14299e-07	hypothetical protein, hypothetical protein, variant	#
CNAG_07356		-2.8637	down	0.000667527	0.00573607	succinate dehydrogenase, cytochrome b556 subunit	#
CNAG_01155		-2.84908	down	6.4614e-09	1.9358e-07	glycerol kinase	#
CNAG_03040		-2.83195	down	2.85552e-06	4.83259e-05	transketolase, transketolase, variant	#
CNAG_01119		-2.82737	down	9.95165e-05	0.00111428	POT family proton-dependent oligopeptide transporter	#
CNAG_03771		-2.82411	down	1.09582e-21	1.12128e-19	DNA binding protein Ncp1, DNA binding protein Ncp1, variant	#
CNAG_03554		-2.81659	down	1.6906e-05	0.000232799	coatomer protein complex, subunit alpha (xenin)	#
CNAG_05197		-2.80499	down	0.00696686	0.0387754	NADH dehydrogenase (ubiquinone) 1 alpha subcomplex 8	#
CNAG_05131		-2.78323	down	2.02387e-05	0.000272485	hypothetical protein	#
CNAG_03987		-2.78085	down	0.00648829	0.0368087	elongation factor 1 alpha-like protein	#
CNAG_04043		-2.77171	down	0.00707323	0.0390731	hypothetical protein	#
CNAG_02577		-2.77079	down	0.000143735	0.00153053	oxidoreductase	#
CNAG_03213	UVE1	-2.76826	down	0.000924737	0.00750967	UV damage endonuclease UvdE, UV damage endonuclease UvdE, variant	#
CNAG_05633		-2.75887	down	3.5304e-07	7.29214e-06	ubiquinol-cytochrome c reductase subunit 9	#
CNAG_06474		-2.75658	down	0.000980358	0.00785586	RNA-binding protein Musashi	#
CNAG_03084		-2.75191	down	0.0071608	0.0394913	endoribonuclease L-PSP	#
CNAG_01845	PKC1	-2.74359	down	0.00105664	0.00833307	protein kinase C	#
CNAG_04879		-2.7394	down	1.55331e-07	3.50205e-06	glycogen debranching enzyme	#
CNAG_01047		-2.72089	down	2.04734e-06	3.60234e-05	hypothetical protein	#
CNAG_02850		-2.71942	down	0.000188852	0.00193537	glucan endo-1,3-alpha-glucosidase agn1	#
CNAG_05219		-2.69832	down	0.00827584	0.0442465	hypothetical protein	#
CNAG_05590	TCO2	-2.69154	down	0.00853234	0.0453264	two-component-like sensor kinase	#
CNAG_01230	MP98	-2.69097	down	5.74246e-13	2.78798e-11	chitin-deacetylase	#
CNAG_01063		-2.68378	down	0.00872583	0.0460901	WD-repeat protein mip1	#
CNAG_02527		-2.68041	down	0.00880432	0.0464006	multidrug transporter, multidrug transporter, variant	#
CNAG_05522		-2.66851	down	0.00931722	0.048603	hypothetical protein	#
CNAG_02460	HEM13	-2.66192	down	5.63881e-08	1.40464e-06	coproporphyrinogen-III oxidase	#
CNAG_04621		-2.63445	down	5.38746e-05	0.00064446	glycogen(starch) synthase, glycogen(starch) synthase, variant	#
CNAG_03629		-2.62095	down	2.32867e-06	4.03334e-05	NADH dehydrogenase (quinone), G subunit	#
CNAG_06672		-2.62056	down	0.00215859	0.015049	formate dehydrogenase	#
CNAG_01360		-2.61403	down	0.00182905	0.0130807	pumilio domain-containing protein c	#
CNAG_06301	SCH9	-2.61142	down	1.39841e-05	0.000198312	agc family protein kinase	#
CNAG_01991		-2.59606	down	7.74498e-07	1.48878e-05	cytochrome c oxidase subunit 4	#
CNAG_05874		-2.59546	down	0.00012765	0.00138952	hypothetical protein	#
CNAG_02542		-2.59185	down	8.49403e-19	6.97454e-17	fructosamine kinase	#
CNAG_03769	HXK2	-2.58624	down	2.02137e-09	6.59025e-08	hexokinase	#
CNAG_00091		-2.57548	down	4.09327e-19	3.44612e-17	hypothetical protein	#
CNAG_03563		-2.57505	down	0.000377412	0.00355547	aspartate-tRNA(Asn) ligase	#
CNAG_06576	CAR1	-2.55098	down	3.26016e-15	2.04559e-13	cAMP-regulated gene 1	#
CNAG_07740		-2.54332	down	0.00232795	0.0159904	hypothetical protein	#
CNAG_07778		-2.5057	down	0.00272507	0.0182522	translation initiation factor 2 subunit 1	#
CNAG_06081		-2.4979	down	2.09276e-06	3.67254e-05	glucose oxidase	#
CNAG_02139		-2.49369	down	0.00282569	0.0187936	oxysterol-binding protein	#
CNAG_00115		-2.48435	down	2.33619e-07	4.99615e-06	chlorophyll synthesis pathway protein BchC	#
CNAG_04361		-2.48269	down	1.14227e-07	2.6657e-06	hypothetical protein	#
CNAG_01558		-2.47702	down	4.73237e-09	1.45718e-07	chlorophyll synthesis pathway protein BchC	#
CNAG_06900		-2.46776	down	4.34391e-07	8.75495e-06	2,3-bisphosphoglycerate-independent phosphoglycerate mutase	#
CNAG_06226		-2.46427	down	0.00345396	0.02226	NADH dehydrogenase (ubiquinone) 1 alpha subcomplex 5	#
CNAG_04891		-2.46251	down	1.30972e-05	0.000187735	hypothetical protein	#
CNAG_07561		-2.46002	down	8.48573e-26	1.10664e-23	6-phosphogluconate dehydrogenase, decarboxylating 1	#
CNAG_06274		-2.45756	down	9.62684e-11	3.67978e-09	hypothetical protein	#
CNAG_03861		-2.44764	down	5.61896e-07	1.11225e-05	cytochrome c oxidase subunit 5a	#
CNAG_00776	MP88	-2.41533	down	8.44237e-12	3.55381e-10	immunoreactive mannoprotein MP88	#
CNAG_05939		-2.40741	down	7.44353e-06	0.000114332	hypothetical protein, hypothetical protein, variant	#
CNAG_05907		-2.40227	down	5.33039e-05	0.000638783	pyruvate carboxylase	#
CNAG_03358		-2.39646	down	1.01913e-13	5.37953e-12	phosphoglycerate kinase	#
CNAG_06475		-2.38584	down	1.64446e-05	0.000226914	hypothetical protein	#
CNAG_02936		-2.37663	down	0.00446448	0.0274176	CCR4-NOT transcription complex subunit 1	#
CNAG_05077		-2.36163	down	0.00489672	0.0295001	glycosyl hydrolase	#
CNAG_06699	GPD	-2.35805	down	7.51733e-22	7.81215e-20	glyceraldehyde-3-phosphate dehydrogenase	#
CNAG_05909		-2.34129	down	9.79258e-11	3.72174e-09	cytochrome c1, heme protein, mitochondrial	#
CNAG_05059		-2.33978	down	1.57014e-06	2.81482e-05	pyruvate dehydrogenase E1 component subunit beta	#
CNAG_01137		-2.33806	down	5.61108e-10	1.96417e-08	aconitate hydratase, mitochondrial	#
CNAG_01106	VPH1	-2.33115	down	0.00137678	0.0103003	vacuolar-ATPase subunit	#
CNAG_04314		-2.33072	down	0.00131749	0.0099916	NAD+ kinase	#
CNAG_07914		-2.32133	down	0.000356911	0.00338633	protein phosphatase 2 (formerly 2A), regulatory subunit A	#
CNAG_01915		-2.31775	down	9.83142e-06	0.0001462	ribonucleoside-diphosphate reductase subunit M2	#
CNAG_05662	ITR4	-2.31761	down	0.00100515	0.00799669	sugar transporter	#
CNAG_01492		-2.31721	down	1.29079e-10	4.79612e-09	hypothetical protein	#
CNAG_00575	CAT3	-2.31194	down	4.14343e-05	0.000514141	catalase 3	#
CNAG_05218	ACA1	-2.31014	down	0.00596997	0.0346477	adenylyl cyclase-associated protein	#
CNAG_00715		-2.29847	down	0.00633127	0.0361453	hypothetical protein	#
CNAG_02399	GLR1	-2.29651	down	0.00159242	0.0117289	glutathione-disulfide reductase	#
CNAG_02115	NHP6B02	-2.29514	down	0.00609951	0.0351975	nonhistone protein 6	#
CNAG_06544		-2.29371	down	2.50094e-07	5.31429e-06	non-histone chromosomal protein 6	#
CNAG_00107		-2.2888	down	0.00618833	0.0355121	hypothetical protein	#
CNAG_00914	KRE6	-2.28845	down	0.00616038	0.0354162	putative beta-glucan synthase	#
CNAG_00727		-2.28548	down	3.57323e-05	0.000453207	mitochondrial protein with role in iron accumulation	#
CNAG_05250		-2.27696	down	0.00637869	0.0363848	telomere maintenance protein	#
CNAG_04903		-2.27596	down	0.000299131	0.00290441	hypothetical protein	#
CNAG_05665		-2.26306	down	0.00702453	0.0389643	hypothetical protein	#
CNAG_02748		-2.26059	down	2.73081e-10	9.76485e-09	UTP-glucose-1-phosphate uridylyltransferase	#
CNAG_02585		-2.25578	down	1.2811e-05	0.000184428	hypothetical protein	#
CNAG_04744		-2.25504	down	4.04782e-06	6.70412e-05	mannose-6-phosphate isomerase, class I	#
CNAG_06169		-2.2534	down	5.75301e-06	9.17585e-05	hypothetical protein	#
CNAG_05179		-2.25213	down	1.19612e-07	2.75457e-06	ubiquinol-cytochrome c reductase core subunit 2	#
CNAG_01112		-2.24821	down	0.000616848	0.00537701	xenobiotic reductase	#
CNAG_00057		-2.24607	down	1.48812e-09	4.9736e-08	fructose-1,6-bisphosphatase I	#
CNAG_02814		-2.24177	down	5.76855e-08	1.43159e-06	glycerol-3-phosphate dehydrogenase	#
CNAG_01261		-2.24132	down	2.89811e-08	7.77232e-07	myosin I binding protein	#
CNAG_02335		-2.23962	down	9.06644e-14	4.86298e-12	hypothetical protein	#
CNAG_06770		-2.23801	down	2.45449e-23	2.81462e-21	fructose-bisphosphate aldolase 1	#
CNAG_00539		-2.23679	down	1.74031e-05	0.000238655	membrane transporter	#
CNAG_02943		-2.23274	down	7.90217e-18	6.04107e-16	cytoplasmic protein, cytoplasmic protein, variant	#
CNAG_02799		-2.23156	down	0.00215745	0.015049	dihydroxyacetone kinase	#
CNAG_05260		-2.22777	down	7.131e-06	0.000110814	glutamate decarboxylase	#
CNAG_06400	PMA1	-2.22588	down	9.89123e-16	6.64511e-14	plasma-membrane proton-efflux P-type ATPase	#
CNAG_04658		-2.22017	down	0.00798374	0.0431706	hypothetical protein	#
CNAG_06897		-2.21737	down	0.000215099	0.00218083	hypothetical protein	#
CNAG_00315		-2.21722	down	7.46056e-06	0.000114332	HHE domain-containing protein	#
CNAG_02079		-2.2152	down	1.15321e-07	2.67248e-06	cytoplasmic protein	#
CNAG_03916		-2.21493	down	2.64998e-11	1.05539e-09	glucose-6-phosphate isomerase	#
CNAG_03937		-2.21307	down	0.00243995	0.0166102	hypothetical protein	#
CNAG_01721	HEM3	-2.20939	down	0.00225949	0.0156043	porphobilinogen deaminase	#
CNAG_02099	FAS1	-2.2037	down	7.42563e-08	1.80908e-06	fatty acid synthase subunit beta, fungi type	#
CNAG_00799		-2.19666	down	1.09189e-05	0.000159959	cellulase	#
CNAG_00337		-2.19031	down	7.10827e-06	0.000110719	hypothetical protein	#
CNAG_01323		-2.18879	down	5.17112e-09	1.57046e-07	ubiquinol-cytochrome c reductase subunit 7	#
CNAG_03684		-2.18779	down	0.00249807	0.0169192	ATP-binding cassette, subfamily B (MDR/TAP), member 10	#
CNAG_00641		-2.18592	down	0.00886519	0.0466439	transcription elongation factor SPT5	#
CNAG_02989		-2.18491	down	0.00890522	0.046784	PX domain-containing protein	#
CNAG_05292	TPS1	-2.17587	down	1.87861e-08	5.16308e-07	alpha-alpha trehalose-phosphate synthase	#
CNAG_02995		-2.1492	down	0.000294521	0.00286904	RNA-binding protein with serine-rich domain 1	#
CNAG_04257		-2.14593	down	0.000939403	0.00758249	hypothetical protein	#
CNAG_07571		-2.13266	down	0.0033918	0.0219838	hypothetical protein	#
CNAG_04009		-2.13258	down	0.00113535	0.00883186	aminopeptidase 2	#
CNAG_00834		-2.11756	down	0.00124613	0.00957048	phosphatidylserine decarboxylase, phosphatidylserine decarboxylase, variant	#
CNAG_00932		-2.10742	down	0.00060654	0.00530105	hypothetical protein	#
CNAG_00570	PKR1	-2.10341	down	0.000453098	0.00411688	camp dependent protein kinase regulatory subunit	#
CNAG_02967		-2.09813	down	0.00396213	0.0249075	hypothetical protein	#
CNAG_00520		-2.09711	down	0.00121291	0.00934768	hypothetical protein	#
CNAG_07177		-2.08743	down	0.00131996	0.00999895	NADH dehydrogenase (ubiquinone) Fe-S protein 3	#
CNAG_00445	NHP6B01	-2.07603	down	0.000497552	0.00447797	nonhistone chromosomal protein	#
CNAG_02129		-2.06541	down	2.88361e-17	2.15493e-15	hypothetical protein	#
CNAG_01890	MET6	-2.06384	down	6.07238e-07	1.18787e-05	methionine synthase	#
CNAG_02938		-2.0535	down	4.05967e-05	0.000506583	cytochrome c oxidase subunit 6a	#
CNAG_06998		-2.05307	down	9.38306e-06	0.000141192	protein transporter SEC61 subunit alpha	#
CNAG_05031		-2.04224	down	3.11949e-05	0.000405229	3-oxoacid CoA-transferase	#
CNAG_03355	TCO4	-2.03877	down	0.00178941	0.0128802	two-component-like sensor kinase	#
CNAG_04041		-2.03739	down	0.0050378	0.0301588	hypothetical protein	#
CNAG_02775		-2.03612	down	0.000358647	0.00339795	hypothetical protein	#
CNAG_05878		-2.02137	down	1.99957e-05	0.000270154	hypothetical protein	#
CNAG_00482		-2.01391	down	0.000722289	0.00608094	26S proteasome regulatory subunit N10	#
CNAG_01683	STL1	-2.0124	down	0.000136912	0.00147109	putative monosaccharide transporter	#
CNAG_03824		-2.01157	down	1.59692e-07	3.58822e-06	solute carrier family 25 (mitochondrial phosphate transporter), member 3	#
CNAG_07887		-2.0033	down	0.00641251	0.0365464	hypothetical protein	#
CNAG_03154		2.00291	up	1.82186e-08	5.02788e-07	hypothetical protein, hypothetical protein, variant	#
CNAG_02924		2.00345	up	0.00665842	0.0376016	histone H1/5	#
CNAG_00604		2.00602	up	0.00596817	0.0346477	hypothetical protein	#
CNAG_01531		2.0124	up	0.00683231	0.0380902	DNA helicase II/ATP-dependent DNA helicase PcrA	#
CNAG_03729		2.01432	up	0.000771978	0.00641002	peroxin-5, peroxin-5, variant	#
CNAG_06934		2.02177	up	0.00566188	0.0331489	hexose transporter protein, hexose transporter protein, variant 1, hexose transporter protein, variant 2, hexose transporter protein, variant 3	#
CNAG_03060		2.02595	up	0.000119521	0.00130746	multiple drug resistance protein	#
CNAG_06419		2.03439	up	0.00182235	0.0130468	hypothetical protein	#
CNAG_05193		2.03966	up	1.30523e-07	2.9832e-06	endoplasmic reticulum-Golgi intermediate compartment protein 2	#
CNAG_07758		2.04073	up	0.00523332	0.0310979	hypothetical protein	#
CNAG_05733		2.04178	up	1.88389e-06	3.33238e-05	cytoplasmic protein	#
CNAG_03687		2.04327	up	0.000592639	0.00520005	hypothetical protein	#
CNAG_05711		2.04479	up	0.000285316	0.00281548	hypothetical protein	#
CNAG_07855		2.04732	up	9.26746e-09	2.72734e-07	midasin	#
CNAG_02299		2.05375	up	0.00477094	0.0288994	hypothetical protein	#
CNAG_03383		2.0605	up	0.00481316	0.0290757	hypothetical protein	#
CNAG_02720		2.06208	up	0.000277132	0.00274287	nuclear GTP-binding protein	#
CNAG_00845		2.07065	up	0.00444647	0.0273575	hypothetical protein	#
CNAG_07774		2.07937	up	0.00442832	0.0272711	hypothetical protein	#
CNAG_03016		2.08198	up	3.28719e-07	6.85363e-06	chaperone regulator, chaperone regulator, variant	#
CNAG_07865		2.0845	up	5.59681e-05	0.00066591	ferro-O2-oxidoreductase	#
CNAG_01553		2.08645	up	1.47717e-07	3.34172e-06	CORD and CS domain-containing protein	#
CNAG_02089		2.08699	up	2.15358e-06	3.76933e-05	hypothetical protein	#
CNAG_06213		2.09139	up	8.4038e-10	2.88112e-08	hypothetical protein	#
CNAG_06515		2.09878	up	0.000174509	0.0018107	hypothetical protein	#
CNAG_00858		2.10796	up	5.62589e-05	0.000666984	hypothetical protein	#
CNAG_07458		2.10951	up	0.00401102	0.0251435	hypothetical protein, hypothetical protein, variant	#
CNAG_06284		2.11119	up	0.00388654	0.0245717	hypothetical protein	#
CNAG_05436		2.11348	up	0.00380828	0.0241477	hypothetical protein	#
CNAG_03115		2.1186	up	0.00365125	0.0233359	hypothetical protein	#
CNAG_05404		2.13023	up	2.09066e-05	0.000279778	histone-lysine N-methyltransferase SUV39H, histone-lysine N-methyltransferase SUV39H, variant 1, histone-lysine N-methyltransferase SUV39H, variant 2	#
CNAG_06865		2.13129	up	0.00342197	0.0221396	translation machinery-associated protein 16	#
CNAG_00702		2.13441	up	2.05507e-07	4.4522e-06	hypothetical protein	#
CNAG_01671		2.13551	up	0.000119285	0.00130703	acetyl/propionyl CoA carboxylase	#
CNAG_00149		2.13734	up	9.76203e-09	2.86023e-07	NADH dehydrogenase (ubiquinone) 1 alpha subcomplex 4	#
CNAG_02229	PFT1	2.13804	up	0.00330858	0.0216375	protein farnesyltransferase/geranylgeranyltransferase type-1 subunit alpha, protein farnesyltransferase/geranylgeranyltransferase type-1 subunit alpha, variant	#
CNAG_05996		2.14589	up	0.000990787	0.00792034	solute carrier family 32 (vesicular inhibitory amino acid transporter)	#
CNAG_01279		2.14784	up	3.24778e-05	0.000418623	ubiquitin-conjugating enzyme E2 S, ubiquitin-conjugating enzyme E2 S, variant	#
CNAG_06611		2.15408	up	4.25096e-06	7.01566e-05	DNA-directed RNA polymerase I subunit RPA2	#
CNAG_02126		2.15489	up	0.000160399	0.001688	hypothetical protein	#
CNAG_05866	PRM1	2.15597	up	0.00307371	0.0203012	putative plasma membrane fusion protein	#
CNAG_07402		2.15799	up	5.11743e-07	1.0221e-05	pantothenate transporter	#
CNAG_03477		2.16061	up	3.57741e-05	0.000453207	hypothetical protein	#
CNAG_04096		2.16123	up	0.00297692	0.0197206	racemase	#
CNAG_02228		2.16533	up	0.000929738	0.0075319	hypothetical protein, hypothetical protein, variant	#
CNAG_02385		2.16579	up	0.00300793	0.0198864	DNA primase small subunit	#
CNAG_01116		2.16723	up	8.43505e-05	0.000962778	beta-ketoacyl reductase	#
CNAG_01687		2.17567	up	0.000832632	0.00686225	Atypical/RIO/RIO2 protein kinase	#
CNAG_04675		2.17869	up	4.51456e-13	2.22417e-11	hypothetical protein	#
CNAG_07729		2.18022	up	0.00962313	0.0497694	hypothetical protein	#
CNAG_08028		2.18439	up	0.00270745	0.0181891	hypothetical protein	#
CNAG_03560		2.18563	up	0.00264257	0.0177892	hypothetical protein	#
CNAG_05320		2.18938	up	0.000285927	0.00281733	oxidoreductase	#
CNAG_01664		2.1922	up	0.000771261	0.00641002	CMGC/CDK/CDC2 protein kinase	#
CNAG_00101		2.19724	up	6.27522e-06	9.91365e-05	hypothetical protein	#
CNAG_03996		2.1997	up	1.05609e-30	1.71319e-28	guanosine-diphosphatase	#
CNAG_05646		2.20069	up	0.000216494	0.00219163	hypothetical protein	#
CNAG_01186		2.20579	up	3.12418e-06	5.26049e-05	hypothetical protein	#
CNAG_08013		2.20695	up	0.00081234	0.00671165	hypothetical protein	#
CNAG_03897		2.20837	up	0.00277623	0.0185762	protein BCP1	#
CNAG_04236		2.2089	up	4.51911e-06	7.40311e-05	pyridoxal phosphate phosphatase phospho2	#
CNAG_03720		2.21264	up	0.000217107	0.00219449	D-tyrosyl-tRNA(Tyr) deacylase, D-tyrosyl-tRNA(Tyr) deacylase, variant	#
CNAG_00652		2.216	up	1.7853e-05	0.000244321	hypothetical protein, hypothetical protein, variant 1, hypothetical protein, variant 2	#
CNAG_04449		2.22107	up	0.000700168	0.0059247	alpha-1,6-mannosyltransferase	#
CNAG_00023		2.22292	up	0.00867237	0.045887	hypothetical protein	#
CNAG_05557		2.22449	up	0.000187816	0.0019307	mitochondrial outer membrane protein	#
CNAG_03817		2.22802	up	0.00837871	0.0446529	cell growth-regulating nucleolar protein	#
CNAG_07980		2.23089	up	0.000630824	0.0054773	hypothetical protein	#
CNAG_05177		2.2397	up	0.00781027	0.042405	DNA polymerase kappa subunit	#
CNAG_06812	SPO14alpha	2.23976	up	3.62218e-06	6.03788e-05	phospholipase D1	#
CNAG_04307	URO1	2.2525	up	4.00267e-08	1.02787e-06	urate oxidase	#
CNAG_07682		2.25493	up	0.00769026	0.0418902	hypothetical protein, hypothetical protein, variant	#
CNAG_04827		2.25893	up	0.000149599	0.00158436	hypothetical protein	#
CNAG_05595		2.26055	up	7.97612e-09	2.35774e-07	hypothetical protein	#
CNAG_03952		2.26946	up	1.34134e-05	0.000191855	hypothetical protein	#
CNAG_04655		2.27919	up	0.00664717	0.0375938	rab family protein	#
CNAG_00233		2.27922	up	1.03749e-06	1.9383e-05	chaperone protein	#
CNAG_04571		2.28047	up	0.00729609	0.0401708	dimethyladenosine transferase	#
CNAG_03012	CQS1	2.28885	up	4.28808e-05	0.000529128	quorum sensing-like molecule	#
CNAG_06348	PDR5-3	2.28972	up	0.000585304	0.0051698	ATP-binding cassette transporter	#
CNAG_02556		2.29176	up	0.0017972	0.0129223	phytanoyl-CoA dioxygenase	#
CNAG_03643		2.29296	up	0.00647876	0.0368045	hypothetical protein	#
CNAG_06277		2.29312	up	2.80624e-06	4.77348e-05	ribosomal RNA-processing protein 12	#
CNAG_06378		2.29489	up	0.0017614	0.01272	hypothetical protein	#
CNAG_04097		2.29754	up	0.00628767	0.0360201	glucose 1-dehydrogenase	#
CNAG_04185		2.29858	up	1.01277e-12	4.77725e-11	hypothetical protein	#
CNAG_04053		2.3018	up	0.00171296	0.0124529	hypothetical protein	#
CNAG_03762		2.30385	up	3.48813e-05	0.000445289	AdoMet-dependent rRNA methyltransferase SPB1	#
CNAG_04495		2.30439	up	0.00631339	0.0360742	hypothetical protein	#
CNAG_03330		2.31457	up	0.00599889	0.0347549	RecQ-mediated genome instability protein 1	#
CNAG_00651		2.32153	up	0.000107846	0.00120148	ATP-binding cassette, subfamily D (ALD), peroxisomal long-chain fatty acid import protein	#
CNAG_05284		2.32766	up	9.20243e-05	0.00104446	hypothetical protein	#
CNAG_01283	CAP5	2.33233	up	0.0003595	0.00340119	hypothetical protein	#
CNAG_04195		2.33687	up	1.89083e-10	6.90983e-09	O-methyltransferase	#
CNAG_02157		2.33852	up	0.00552431	0.0325152	hypothetical protein	#
CNAG_00728		2.33876	up	0.00144688	0.0107282	dityrosine transporter	#
CNAG_01651		2.34365	up	0.000388166	0.00363107	glicosidase	#
CNAG_05024		2.34411	up	0.00129205	0.00985482	L-xylulose reductase	#
CNAG_05695		2.34621	up	6.66081e-09	1.98659e-07	glucosamine 6-phosphate N-acetyltransferase	#
CNAG_01289		2.35998	up	2.95215e-05	0.000384996	hypothetical protein	#
CNAG_01925		2.36204	up	7.70592e-09	2.28804e-07	hypothetical protein	#
CNAG_07389		2.36329	up	3.76559e-07	7.70614e-06	flavin-containing monooxygenase	#
CNAG_03735	CAP4	2.36388	up	7.26683e-05	0.000844993	hypothetical protein	#
CNAG_06525		2.36645	up	0.00512493	0.0305703	nuclear protein	#
CNAG_06657		2.36888	up	1.35412e-06	2.47425e-05	hypothetical protein	#
CNAG_01501		2.36899	up	0.000302599	0.00292952	hypothetical protein	#
CNAG_02765		2.37247	up	0.000269742	0.00268571	3-hydroxyisobutyrate dehydrogenase	#
CNAG_00903		2.37807	up	0.00523675	0.0310979	hypothetical protein, hypothetical protein, variant 1, hypothetical protein, variant 2	#
CNAG_07364		2.3793	up	2.29923e-05	0.00030465	WD-repeat protein 21A	#
CNAG_02122		2.38026	up	1.70644e-05	0.000234495	cytoplasmic tRNA 2-thiolation protein 1	#
CNAG_02776		2.38474	up	0.00454981	0.0278388	hypothetical protein	#
CNAG_02752		2.3853	up	1.02402e-07	2.41517e-06	short-chain dehydrogenase	#
CNAG_05755		2.38535	up	0.00454528	0.0278367	protein MAK16	#
CNAG_04871		2.38989	up	1.85244e-05	0.000252471	hypothetical protein	#
CNAG_05597		2.39277	up	0.000243861	0.00244265	transcription initiation factor TFIID subunit 9/adenylate kinase	#
CNAG_07413	NOG2	2.39722	up	5.66126e-05	0.000669761	putative nucleolar gtp-binding protein	#
CNAG_07613		2.39791	up	0.00479368	0.0289844	hypothetical protein	#
CNAG_06336		2.40097	up	2.25111e-12	1.00484e-10	glucan 1,3-beta-glucosidase	#
CNAG_00423		2.40187	up	0.00458444	0.0279735	kinetochore protein Spc24, fungi type	#
CNAG_02382		2.4026	up	1.97902e-05	0.000268075	ribosome biogenesis protein BRX1	#
CNAG_02026		2.4042	up	0.00423125	0.0262764	hypothetical protein	#
CNAG_06383		2.40635	up	0.00101696	0.00808097	cytoplasmic protein	#
CNAG_00906		2.40783	up	2.8048e-07	5.92212e-06	nucleolar pre-ribosomal-associated protein 1, nucleolar pre-ribosomal-associated protein 1, variant	#
CNAG_05571		2.41108	up	1.20811e-06	2.21965e-05	U3 small nucleolar RNA-associated protein 20	#
CNAG_01151		2.41109	up	0.00413564	0.0257548	ubiquitin-conjugating enzyme E2 D/E	#
CNAG_06448		2.41703	up	2.05548e-05	0.000276181	cystathionine gamma-lyase	#
CNAG_02882		2.41834	up	0.000210713	0.00214617	hypothetical protein	#
CNAG_07518		2.42476	up	0.00415317	0.0258156	ribonuclease P/MRP protein subunit POP5	#
CNAG_02502		2.42626	up	0.00110047	0.00861085	ATP-dependent RNA helicase DBP3	#
CNAG_06098		2.42733	up	3.25895e-14	1.83689e-12	glucosamine-6-phosphate deaminase	#
CNAG_03205		2.43085	up	0.000862146	0.00707917	ATP-dependent RNA helicase ROK1	#
CNAG_05263		2.43088	up	0.00382453	0.0242026	hypothetical protein	#
CNAG_04850		2.43106	up	0.0038072	0.0241477	hypothetical protein, hypothetical protein, variant	#
CNAG_04348		2.43301	up	0.000942593	0.00759901	chaperone	#
CNAG_01555		2.43581	up	0.00441216	0.0272211	hypothetical protein	#
CNAG_01499		2.44296	up	0.00365599	0.0233359	hypothetical protein, hypothetical protein, variant	#
CNAG_05916		2.44381	up	1.2288e-05	0.000178445	hypothetical protein	#
CNAG_05932		2.4525	up	2.75084e-36	4.69124e-34	peptidyl-prolyl cis-trans isomerase D	#
CNAG_05032		2.45592	up	9.52623e-06	0.00014238	hypothetical protein	#
CNAG_06259		2.4573	up	0.00363981	0.0232997	MFS transporter, SP family, general alpha glucoside:H+ symporter	#
CNAG_05272		2.45788	up	0.000754484	0.00632796	hypothetical protein, hypothetical protein, variant	#
CNAG_07548		2.46494	up	0.00332884	0.0216847	cytoplasmic protein	#
CNAG_04753		2.46786	up	2.82302e-12	1.25173e-10	gluconolactonase	#
CNAG_06517		2.46913	up	1.90251e-08	5.20725e-07	cytoplasmic protein	#
CNAG_06005		2.47501	up	8.30063e-06	0.000125757	U3 small nucleolar RNA-associated protein 4	#
CNAG_01143		2.47613	up	0.000686065	0.00585002	hypothetical protein	#
CNAG_01835		2.47739	up	3.77347e-16	2.58735e-14	hypothetical protein	#
CNAG_03645		2.47783	up	0.00045536	0.00413178	NET1-associated nuclear protein 1 (U3 small nucleolar RNA-associated protein 17), NET1-associated nuclear protein 1 (U3 small nucleolar RNA-associated protein 17), variant	#
CNAG_00141		2.48165	up	5.28167e-05	0.000635233	monooxygenase	#
CNAG_05245		2.4827	up	0.00318252	0.0209366	hypothetical protein	#
CNAG_05066		2.48715	up	3.28611e-05	0.000422745	hypothetical protein	#
CNAG_05835	LIV3	2.49438	up	2.78266e-18	2.20327e-16	wor1/pac2 family transcription factor	#
CNAG_05548		2.49534	up	0.0033231	0.0216685	hypothetical protein	#
CNAG_01242	HAPX	2.49591	up	3.34957e-20	3.05178e-18	hypothetical protein	#
CNAG_03192		2.50862	up	0.000613031	0.00535074	tRNA-specific adenosine deaminase 1, tRNA-specific adenosine deaminase 1, variant	#
CNAG_03140		2.51521	up	1.84884e-21	1.80833e-19	sugar transporter	#
CNAG_06814	SXI1alpha	2.51544	up	6.05007e-06	9.60358e-05	hypothetical protein	#
CNAG_02291		2.52253	up	4.79742e-06	7.78234e-05	DASH complex subunit DAM1	#
CNAG_06520		2.53511	up	0.000520872	0.00465635	hypothetical protein	#
CNAG_01611	LIV8	2.53546	up	0.000546143	0.00484364	infection related protein of unknown function	#
CNAG_00487		2.53698	up	0.00262595	0.0176952	hypothetical protein	#
CNAG_04867		2.54024	up	0.0025642	0.0173142	vacuolar protein	#
CNAG_03414		2.54252	up	0.00271547	0.0182246	hypothetical protein, hypothetical protein, variant	#
CNAG_06535		2.54345	up	9.8377e-05	0.00110525	ribosome biogenesis protein UTP30	#
CNAG_02841		2.54699	up	4.77382e-08	1.19814e-06	cytochrome P450 monooxygenase pc-2, cytochrome P450 monooxygenase pc-2, variant	#
CNAG_05430		2.55213	up	1.83442e-07	4.02665e-06	hypothetical protein	#
CNAG_05230		2.55832	up	7.9762e-07	1.52442e-05	sentrin/sumo-specific protease	#
CNAG_07540		2.56064	up	6.81375e-15	4.01046e-13	hypothetical protein	#
CNAG_04852		2.5623	up	3.57811e-06	5.9794e-05	7,8-dihydro-8-oxoguanine triphosphatase	#
CNAG_01983		2.56527	up	3.40194e-13	1.70122e-11	cAMP-independent regulatory protein	#
CNAG_06493		2.56754	up	1.13883e-10	4.25527e-09	hypothetical protein	#
CNAG_02563		2.57287	up	0.000141594	0.0015138	DNA polymerase delta subunit 1	#
CNAG_05911		2.57817	up	4.30436e-06	7.08621e-05	hypothetical protein	#
CNAG_07519		2.58902	up	1.41101e-05	0.000199673	hypothetical protein	#
CNAG_03547		2.59427	up	1.36187e-05	0.000193543	hypothetical protein	#
CNAG_04801		2.61583	up	5.74279e-13	2.78798e-11	hypothetical protein	#
CNAG_03354		2.62654	up	0.00175974	0.01272	hypothetical protein	#
CNAG_05479		2.62759	up	2.46681e-06	4.23948e-05	hypothetical protein, hypothetical protein, variant	#
CNAG_01882		2.63153	up	5.66945e-05	0.000669761	histone-lysine N-methyltransferase, H3 lysine-79 specific	#
CNAG_05761		2.63244	up	9.84781e-06	0.0001462	cyclin-dependent kinase regulatory subunit CKS1	#
CNAG_00474		2.63914	up	4.43258e-10	1.55985e-08	hypothetical protein	#
CNAG_00503		2.64206	up	2.71034e-19	2.3411e-17	hypothetical protein	#
CNAG_01695		2.64455	up	0.00166264	0.0121519	hypothetical protein	#
CNAG_02659		2.65054	up	8.21136e-05	0.000939996	hypothetical protein, hypothetical protein, variant	#
CNAG_01318		2.65074	up	1.12337e-18	9.00187e-17	sodium/hydrogen exchanger 3	#
CNAG_06760		2.67316	up	0.000243772	0.00244265	hypothetical protein	#
CNAG_02386		2.6764	up	3.70878e-07	7.61331e-06	hypothetical protein	#
CNAG_01635		2.67648	up	3.61305e-25	4.53404e-23	hypothetical protein	#
CNAG_05358		2.6765	up	0.00029442	0.00286904	hypothetical protein	#
CNAG_02191		2.68565	up	1.57605e-06	2.81782e-05	hypothetical protein	#
CNAG_01542		2.69978	up	1.93176e-07	4.21251e-06	taurine catabolism dioxygenase TauD	#
CNAG_02550		2.71446	up	1.08627e-24	1.3136e-22	hypothetical protein	#
CNAG_03763		2.71576	up	4.00925e-18	3.13712e-16	IQ domain-containing GTPase activating protein	#
CNAG_03231		2.72156	up	0.00832009	0.0444116	hypothetical protein, hypothetical protein, variant	#
CNAG_05861		2.72476	up	9.51937e-07	1.79867e-05	hypothetical protein, hypothetical protein, variant	#
CNAG_07998		2.73229	up	0.000179816	0.00185708	hypothetical protein	#
CNAG_03883		2.73251	up	0.00120203	0.0092854	hypothetical protein, hypothetical protein, variant	#
CNAG_00195		2.73304	up	5.62141e-06	9.00915e-05	exosome complex protein LRP1	#
CNAG_03709		2.74323	up	0.0080228	0.0432763	hypothetical protein	#
CNAG_06320		2.74343	up	1.10935e-25	1.41891e-23	hypothetical protein	#
CNAG_06252		2.74633	up	0.0011002	0.00861085	hypothetical protein	#
CNAG_01975		2.74788	up	1.71733e-07	3.82005e-06	helicase	#
CNAG_01207		2.74998	up	6.3247e-06	9.96815e-05	hypothetical protein	#
CNAG_07642		2.75571	up	0.00808927	0.0435289	hypothetical protein	#
CNAG_02934		2.76526	up	8.75642e-13	4.15992e-11	hypothetical protein, hypothetical protein, variant	#
CNAG_04136		2.76621	up	7.00047e-13	3.37392e-11	methylthioribose-1-phosphate isomerase	#
CNAG_01463		2.76879	up	9.65611e-08	2.29367e-06	hypothetical protein	#
CNAG_03558		2.76934	up	6.52395e-11	2.52272e-09	hypothetical protein	#
CNAG_08027		2.77035	up	2.29942e-05	0.00030465	hypothetical protein	#
CNAG_03504		2.7724	up	0.000145528	0.00154618	hypothetical protein	#
CNAG_02509		2.77407	up	0.00733786	0.0402992	hypothetical protein	#
CNAG_05405		2.77482	up	0.00805226	0.0433811	hypothetical protein	#
CNAG_00597	DIP5	2.77629	up	0.000907463	0.00738744	amino acid transporter, amino acid transporter, variant	#
CNAG_06468		2.777	up	7.38471e-07	1.42778e-05	nucleolar GTP-binding protein	#
CNAG_06014		2.77722	up	0.00775211	0.0421647	hypothetical protein	#
CNAG_06382		2.77834	up	0.000960589	0.00773472	beta-transducin repeat containing protein	#
CNAG_03294		2.7839	up	0.00819947	0.0439441	hypothetical protein	#
CNAG_02412		2.78893	up	4.67712e-09	1.44686e-07	rRNA-processing protein CGR1	#
CNAG_05675		2.79221	up	2.4748e-05	0.000324013	trimethyllysine dioxygenase	#
CNAG_06247		2.80427	up	0.000137197	0.00147177	hypothetical protein	#
CNAG_04873		2.80525	up	0.0067696	0.0378676	hypothetical protein, hypothetical protein, variant	#
CNAG_06092	CLN1	2.80788	up	1.05807e-08	3.05967e-07	cyclin 1	#
CNAG_02159		2.8127	up	0.000131744	0.00142245	hypothetical protein	#
CNAG_01133		2.81686	up	3.93348e-07	8.00851e-06	mitochondrial protein	#
CNAG_06265		2.82474	up	1.63337e-05	0.000225853	high-affinity nicotinic acid transporter	#
CNAG_08020		2.82865	up	0.00010892	0.00120738	hypothetical protein	#
CNAG_01760		2.83167	up	1.49889e-05	0.000210319	hypothetical protein	#
CNAG_06094		2.83228	up	0.00013235	0.00142436	hypothetical protein	#
CNAG_00005		2.83683	up	2.26585e-06	3.94507e-05	TPR repeat-containing protein	#
CNAG_07837		2.8481	up	0.00578615	0.0337576	hypothetical protein, hypothetical protein, variant	#
CNAG_04072		2.84934	up	1.34959e-05	0.00019262	60S ribosome subunit biogenesis protein nip7	#
CNAG_00332		2.86175	up	8.68393e-05	0.000987296	hypothetical protein	#
CNAG_04026		2.86254	up	0.00086563	0.00709902	chromosome transmission fidelity protein 1	#
CNAG_00132		2.86645	up	0.000673036	0.00577595	hypothetical protein, hypothetical protein, variant	#
CNAG_04858		2.87709	up	1.45096e-06	2.6367e-05	hypothetical protein	#
CNAG_02143		2.884	up	1.65456e-06	2.95027e-05	hypothetical protein, hypothetical protein, variant	#
CNAG_05003		2.88751	up	1.73715e-07	3.85127e-06	hypothetical protein	#
CNAG_05057		2.888	up	6.93922e-08	1.70936e-06	hypothetical protein, hypothetical protein, variant	#
CNAG_01781		2.88848	up	1.05569e-12	4.94462e-11	hypothetical protein, hypothetical protein, variant 1, hypothetical protein, variant 2, hypothetical protein, variant 3	#
CNAG_00488		2.89043	up	8.43932e-05	0.000962778	hypothetical protein, hypothetical protein, variant	#
CNAG_07928		2.89147	up	0.000623548	0.0054212	hypothetical protein	#
CNAG_06431		2.90412	up	3.44298e-05	0.000440563	acyl-CoA oxidase	#
CNAG_04311		2.91108	up	1.55853e-06	2.81214e-05	charged multivesicular body protein 7	#
CNAG_00433		2.91276	up	3.28063e-08	8.65853e-07	hypothetical protein	#
CNAG_06807		2.92808	up	2.43859e-06	4.20184e-05	hypothetical protein	#
CNAG_05161		2.929	up	1.13476e-06	2.10818e-05	hypothetical protein, hypothetical protein, variant	#
CNAG_02719		2.93026	up	6.10398e-05	0.00071349	hypothetical protein	#
CNAG_06326		2.93211	up	0.000546193	0.00484364	solute carrier family 40 (iron-regulated transporter), member 1	#
CNAG_03772	HXS1	2.93416	up	1.00498e-18	8.15134e-17	high-affinity glucose transporter	#
CNAG_06574	APP1	2.93493	up	4.80328e-09	1.4722e-07	secreted antiphagocytic protein	#
CNAG_02176		2.93607	up	2.55463e-30	4.04544e-28	hypothetical protein	#
CNAG_06000		2.93749	up	8.20147e-41	1.66441e-38	glycoprotein	#
CNAG_02839		2.94416	up	3.53718e-11	1.40034e-09	hypothetical protein	#
CNAG_03889		2.94765	up	0.00425129	0.0263517	hypothetical protein	#
CNAG_02005		2.94989	up	0.000352975	0.00335856	hypothetical protein	#
CNAG_07966		2.9545	up	5.41077e-05	0.000646087	hypothetical protein	#
CNAG_04389		2.96119	up	1.08041e-08	3.11073e-07	hypothetical protein	#
CNAG_00691		2.96338	up	6.246e-19	5.19277e-17	hypothetical protein	#
CNAG_03526		2.96375	up	5.10999e-05	0.000616815	chromosome transmission fidelity protein 8	#
CNAG_06251		2.96874	up	0.000433958	0.00399205	ser/Thr protein phosphatase	#
CNAG_02323		2.98046	up	6.99853e-08	1.71761e-06	hypothetical protein	#
CNAG_02694		2.9811	up	7.39956e-08	1.80908e-06	hypothetical protein, hypothetical protein, variant	#
CNAG_03302		2.98121	up	4.97962e-06	8.04111e-05	protein LTV1	#
CNAG_05438		2.98163	up	0.000410646	0.00381987	hypothetical protein	#
CNAG_05735		2.99138	up	4.55708e-05	0.000559036	hypothetical protein, hypothetical protein, variant	#
CNAG_04034		3.00321	up	0.000420028	0.00389624	hypothetical protein	#
CNAG_05313		3.01517	up	2.25196e-15	1.45415e-13	hypothetical protein, hypothetical protein, variant 1, hypothetical protein, variant 2, hypothetical protein, variant 3, hypothetical protein, variant 4	#
CNAG_07528		3.01993	up	4.05211e-06	6.70412e-05	hypothetical protein	#
CNAG_03481		3.02327	up	3.58564e-05	0.000453386	ribonuclease P protein component	#
CNAG_04673		3.02585	up	2.1361e-09	6.93035e-08	NAD dependent epimerase/dehydratase	#
CNAG_05962		3.02598	up	0.00361662	0.0232183	hypothetical protein, hypothetical protein, variant 1, hypothetical protein, variant 2	#
CNAG_02185		3.02818	up	5.40009e-07	1.07212e-05	nuclear protein	#
CNAG_00142		3.02913	up	4.5417e-08	1.14855e-06	hypothetical protein	#
CNAG_05459		3.03315	up	2.47468e-15	1.58261e-13	Pi-transporter A-1	#
CNAG_01551	GAT201	3.03671	up	1.66782e-17	1.26053e-15	hypothetical protein	#
CNAG_04474		3.03872	up	0.000352059	0.0033583	monocarboxylic acid transporter	#
CNAG_06756		3.05128	up	3.65719e-09	1.1528e-07	pre-rRNA-processing protein ESF2	#
CNAG_07476		3.05819	up	4.4585e-07	8.95875e-06	hypothetical protein	#
CNAG_01538		3.06158	up	4.64364e-05	0.000567736	hypothetical protein	#
CNAG_05632		3.06274	up	3.04775e-15	1.93053e-13	hypothetical protein	#
CNAG_06913		3.06555	up	7.72854e-11	2.97125e-09	L-serine ammonia-lyase	#
CNAG_01474		3.06575	up	0.000277956	0.00274694	hypothetical protein, hypothetical protein, variant	#
CNAG_06926		3.06917	up	1.13317e-09	3.86498e-08	hypothetical protein	#
CNAG_01055		3.06966	up	1.18993e-24	1.41325e-22	phospholipid transporter, phospholipid transporter, variant	#
CNAG_06758		3.07038	up	0.00311253	0.0205372	efflux protein	#
CNAG_04623		3.08182	up	0.00286605	0.019024	hypothetical protein	#
CNAG_01608		3.08507	up	2.37032e-05	0.000312797	nuclear GTP-binding protein, nuclear GTP-binding protein, variant	#
CNAG_06882		3.08861	up	2.4304e-05	0.000320091	hypothetical protein	#
CNAG_05608		3.10508	up	2.18876e-12	9.83613e-11	hypothetical protein	#
CNAG_02960		3.11122	up	2.0669e-05	0.000277157	RNA exonuclease 4	#
CNAG_07493		3.11315	up	2.14601e-08	5.82575e-07	hypothetical protein	#
CNAG_04298		3.11966	up	2.21876e-06	3.87322e-05	nucleolar complex protein 3	#
CNAG_05924		3.12513	up	0.00929048	0.0485015	hypothetical protein	#
CNAG_06126		3.12654	up	0.00247749	0.016801	Pin2-interacting protein X1	#
CNAG_06245		3.13045	up	0.000291192	0.00285451	hypothetical protein	#
CNAG_05304		3.13302	up	0.00916441	0.0479941	hypothetical protein, hypothetical protein, variant 1, hypothetical protein, variant 2	#
CNAG_06007		3.13378	up	1.87247e-05	0.00025448	U3 small nucleolar RNA-associated protein 23	#
CNAG_03746		3.15071	up	1.06372e-10	4.01977e-09	hypothetical protein	#
CNAG_05640		3.15262	up	6.04718e-23	6.81692e-21	metal iron transporter	#
CNAG_03979		3.15329	up	0.00232074	0.015962	ATP(GTP)-binding protein Fet5	#
CNAG_02573		3.15399	up	0.00231389	0.0159314	hypothetical protein	#
CNAG_02464		3.15835	up	1.15026e-08	3.26938e-07	5-oxoprolinase (ATP-hydrolysing)	#
CNAG_00397		3.16295	up	1.80925e-08	5.01387e-07	2-oxoisovalerate dehydrogenase E1 component, beta subunit	#
CNAG_06973		3.16429	up	0.00842238	0.0448271	hypothetical protein	#
CNAG_01349		3.19056	up	0.00793577	0.0429461	hypothetical protein	#
CNAG_03825		3.1933	up	0.00776337	0.0421848	hypothetical protein, hypothetical protein, variant	#
CNAG_03656		3.20132	up	0.00847697	0.0450682	hypothetical protein	#
CNAG_03740		3.2037	up	0.00201256	0.014255	hypothetical protein	#
CNAG_05381	ITR3C	3.20958	up	0.00831536	0.0444116	myo-inositol transporter	#
CNAG_06034		3.23154	up	1.99312e-15	1.29963e-13	allantoin permease	#
CNAG_03867		3.23278	up	0.00703645	0.038967	hypothetical protein	#
CNAG_07466		3.23289	up	0.00176983	0.012767	U3 small nucleolar RNA-associated protein 7, U3 small nucleolar RNA-associated protein 7, variant 1, U3 small nucleolar RNA-associated protein 7, variant 2	#
CNAG_01353		3.24118	up	0.00171465	0.0124529	hypothetical protein	#
CNAG_04029		3.24264	up	0.00011799	0.00129711	cytochrome P450	#
CNAG_00897	SKN1	3.24429	up	3.054e-27	4.14534e-25	putative glucosidase	#
CNAG_03313		3.24467	up	0.00699081	0.0388762	hypothetical protein, hypothetical protein, variant	#
CNAG_06698		3.24674	up	7.72023e-10	2.66048e-08	phosphatase	#
CNAG_01074		3.24887	up	1.41957e-05	0.000200458	neutral amino acid transporter, neutral amino acid transporter, variant	#
CNAG_05986		3.26066	up	0.00669942	0.0376229	hypothetical protein	#
CNAG_03238		3.27804	up	3.17242e-09	1.00475e-07	dioxygenase subfamily protein	#
CNAG_07892		3.28166	up	5.82604e-07	1.14304e-05	hypothetical protein	#
CNAG_04960		3.28196	up	0.000109695	0.00121395	hypothetical protein	#
CNAG_06831		3.29643	up	0.00610175	0.0351975	hypothetical protein, hypothetical protein, variant	#
CNAG_00813		3.30087	up	0.00139956	0.0104355	hypothetical protein	#
CNAG_02759		3.31045	up	3.1742e-08	8.41099e-07	hypothetical protein	#
CNAG_00401		3.31087	up	0.0061612	0.0354162	phosphatidylinositol glycan, class U	#
CNAG_07983		3.31767	up	0.00131323	0.00997887	hypothetical protein	#
CNAG_06449		3.32353	up	0.00141564	0.0105318	hypothetical protein, hypothetical protein, variant 1, hypothetical protein, variant 2	#
CNAG_01992		3.32831	up	0.0055036	0.032422	hypothetical protein	#
CNAG_07881		3.3326	up	0.00127721	0.00975284	hypothetical protein, hypothetical protein, variant 1, hypothetical protein, variant 2	#
CNAG_02220		3.3329	up	2.15379e-09	6.95381e-08	hypothetical protein	#
CNAG_04210		3.333	up	1.66156e-06	2.95482e-05	MFS transporter, SP family, general alpha glucoside:H+ symporter	#
CNAG_03464	LAC2	3.33764	up	3.41247e-08	8.97088e-07	laccase	#
CNAG_02452		3.3389	up	7.85681e-05	0.000904076	hypothetical protein	#
CNAG_00980		3.34407	up	0.00542758	0.0320488	hypothetical protein	#
CNAG_07008		3.34833	up	3.02196e-07	6.3404e-06	hypothetical protein, hypothetical protein, variant	#
CNAG_07457		3.34949	up	5.7723e-14	3.13355e-12	hypothetical protein	#
CNAG_03137		3.35161	up	4.60432e-14	2.55194e-12	CMGC/CDK protein kinase	#
CNAG_01379		3.35249	up	1.38235e-09	4.64345e-08	hypothetical protein	#
CNAG_04317		3.3554	up	0.0050482	0.0301938	hypothetical protein	#
CNAG_05423		3.3662	up	6.45509e-12	2.76986e-10	SET domain-containing protein	#
CNAG_05432		3.37402	up	0.0048463	0.0292493	hypothetical protein	#
CNAG_00896		3.37831	up	3.91518e-14	2.18822e-12	transcription factor	#
CNAG_04877		3.38724	up	2.04056e-08	5.5622e-07	hypothetical protein	#
CNAG_06623		3.39298	up	7.76811e-30	1.17422e-27	inositol oxygenase	#
CNAG_00359		3.39404	up	4.03366e-07	8.17922e-06	hypothetical protein	#
CNAG_02392		3.39908	up	5.75617e-05	0.0006788	hypothetical protein	#
CNAG_01994		3.40505	up	0.00475924	0.0288548	hypothetical protein	#
CNAG_03043		3.4133	up	0.000962345	0.00773949	hypothetical protein, hypothetical protein, variant 1, hypothetical protein, variant 2	#
CNAG_04333		3.42273	up	0.00135773	0.0101921	hypothetical protein	#
CNAG_05022		3.42412	up	1.66606e-07	3.72692e-06	hypothetical protein	#
CNAG_02254		3.42741	up	0.00112112	0.00875183	quinate permease	#
CNAG_00284		3.43571	up	1.66986e-07	3.72692e-06	efflux protein EncT, efflux protein EncT, variant	#
CNAG_00456		3.45437	up	2.2401e-52	6.47779e-50	hypothetical protein	#
CNAG_03764		3.47088	up	0.000771335	0.00641002	integral membrane protein	#
CNAG_01367		3.47356	up	2.0186e-06	3.5612e-05	hypothetical protein	#
CNAG_04294		3.47747	up	2.57907e-20	2.38242e-18	hypothetical protein	#
CNAG_01336		3.48062	up	0.00414043	0.0257605	hypothetical protein, hypothetical protein, variant	#
CNAG_06815	FAO1	3.50347	up	3.44448e-05	0.000440563	putative fatty alcohol oxidase in the mating-type locus	#
CNAG_00010		3.50432	up	5.80452e-15	3.47903e-13	cation transporter	#
CNAG_02235		3.51121	up	4.72023e-05	0.000574987	hypothetical protein	#
CNAG_05217		3.51499	up	0.000681786	0.005821	hypothetical protein	#
CNAG_00452		3.51571	up	4.581e-09	1.43043e-07	isovaleryl-CoA dehydrogenase	#
CNAG_01736		3.51768	up	0.000679105	0.00580556	DASH complex subunit DAD4	#
CNAG_07486		3.51901	up	8.18332e-08	1.972e-06	hypothetical protein	#
CNAG_01787		3.52382	up	0.000771328	0.00641002	hypothetical protein	#
CNAG_03636		3.52716	up	3.14297e-14	1.78665e-12	DNA-directed RNA polymerase I and III subunit RPAC2	#
CNAG_05910		3.53825	up	0.000651679	0.00560714	hypothetical protein	#
CNAG_03229	YOX101	3.54197	up	5.34363e-14	2.93723e-12	specific transcriptional repressor	#
CNAG_05501		3.56129	up	0.000600437	0.00525461	hypothetical protein, hypothetical protein, variant	#
CNAG_06628		3.56379	up	5.75282e-41	1.23426e-38	aldehyde dehydrogenase (NAD+)	#
CNAG_07893		3.56817	up	0.000591727	0.00519891	hypothetical protein	#
CNAG_07803		3.59984	up	0.00282267	0.0187936	hypothetical protein	#
CNAG_01872		3.61285	up	1.61038e-13	8.30284e-12	solute carrier family 31 (copper transporter), member 1	#
CNAG_03461		3.62033	up	3.46101e-08	9.06266e-07	hypothetical protein, hypothetical protein, variant	#
CNAG_00887		3.64728	up	0.000428065	0.00394877	hypothetical protein	#
CNAG_01244		3.6523	up	0.00283545	0.0188397	hypothetical protein, hypothetical protein, variant	#
CNAG_01680		3.65797	up	2.0025e-05	0.000270154	3-methylcrotonyl-CoA carboxylase alpha subunit	#
CNAG_03055		3.67119	up	2.58425e-28	3.73648e-26	bud site selection protein 20	#
CNAG_00759		3.67137	up	0.00339458	0.0219838	hypothetical protein, hypothetical protein, variant	#
CNAG_00738		3.67539	up	0.00247809	0.016801	hypothetical protein	#
CNAG_04240		3.693	up	0.00215334	0.015049	hypothetical protein	#
CNAG_06424		3.69648	up	4.716e-38	8.47733e-36	claudin family protein	#
CNAG_02497		3.70265	up	1.42645e-05	0.000201002	thaumatin family protein, thaumatin family protein, variant	#
CNAG_01883		3.71304	up	0.00206332	0.0145218	hypothetical protein	#
CNAG_05853		3.7201	up	0.00203221	0.0143332	hypothetical protein	#
CNAG_02848		3.73074	up	3.6357e-07	7.48638e-06	hypothetical protein	#
CNAG_07076		3.7319	up	0.00198625	0.0141289	hypothetical protein	#
CNAG_05778		3.73322	up	3.15742e-19	2.69231e-17	WSC domain-containing protein, WSC domain-containing protein, variant	#
CNAG_00895	ZIP1	3.73333	up	6.47433e-43	1.59484e-40	zinc ion transporter	#
CNAG_00505		3.74875	up	1.99219e-15	1.29963e-13	hypothetical protein	#
CNAG_07399		3.76097	up	0.000275047	0.00272629	hypothetical protein	#
CNAG_05338		3.77283	up	1.25406e-08	3.54926e-07	hypothetical protein	#
CNAG_01369		3.77355	up	1.13618e-08	3.24322e-07	hypothetical protein, hypothetical protein, variant	#
CNAG_02082		3.78105	up	0.0017585	0.01272	DASH complex subunit DAD1	#
CNAG_02750		3.78635	up	2.4528e-07	5.22871e-06	hypothetical protein, hypothetical protein, variant 1, hypothetical protein, variant 2	#
CNAG_05312		3.8069	up	1.28872e-21	1.27929e-19	hypothetical protein	#
CNAG_00186		3.81438	up	2.09119e-07	4.50114e-06	mitotic spindle organizing protein 1	#
CNAG_00815	SIT1	3.81878	up	1.73956e-09	5.72763e-08	siderophore iron transporter	#
CNAG_05279		3.82406	up	0.000236329	0.00238513	hypothetical protein	#
CNAG_00814		3.82429	up	2.065e-07	4.4592e-06	hypothetical protein	#
CNAG_01841	GLN3	3.84867	up	5.89618e-06	9.38169e-05	hypothetical protein	#
CNAG_04088		3.85288	up	6.53955e-06	0.000102824	hypothetical protein	#
CNAG_00654	SRX1	3.86748	up	3.51017e-22	3.7655e-20	sulfiredoxin	#
CNAG_05580		3.88574	up	0.00127126	0.00972973	hypothetical protein	#
CNAG_04756		3.89009	up	3.01708e-22	3.2896e-20	hypothetical protein	#
CNAG_06912		3.90549	up	5.79501e-14	3.13355e-12	hypothetical protein, hypothetical protein, variant	#
CNAG_01681	FCY2	3.92932	up	1.0054e-70	3.71496e-68	cytosine permease	#
CNAG_04225		3.969	up	3.39887e-17	2.51176e-15	hypothetical protein	#
CNAG_03076		3.97167	up	2.75731e-06	4.70227e-05	hypothetical protein	#
CNAG_03224		3.97633	up	0.00102188	0.00810075	hypothetical protein	#
CNAG_07041		3.97837	up	0.00119997	0.00928024	hypothetical protein	#
CNAG_02797	CPL1	3.98047	up	8.34217e-13	3.99164e-11	putative secreted protein	#
CNAG_07490		3.98123	up	0.000995689	0.00794997	hypothetical protein	#
CNAG_04735	MEP1	4.00228	up	7.06977e-56	2.13732e-53	metalloproteinase	#
CNAG_04217	PCK1	4.02005	up	7.38875e-35	1.22856e-32	phosphoenolpyruvate carboxykinase (ATP)	#
CNAG_06186		4.02578	up	3.59245e-42	8.53335e-40	hypothetical protein, hypothetical protein, variant 1, hypothetical protein, variant 2	#
CNAG_06785		4.03205	up	3.95327e-15	2.45731e-13	kynurenine 3-monooxygenase	#
CNAG_01331		4.05821	up	3.76471e-28	5.32747e-26	hypothetical protein	#
CNAG_01040		4.05915	up	1.38177e-11	5.70815e-10	carboxypeptidase D	#
CNAG_06115		4.07121	up	1.26914e-14	7.4044e-13	acid phosphatase	#
CNAG_07788		4.08433	up	2.71474e-08	7.33972e-07	hypothetical protein	#
CNAG_00454		4.09092	up	1.42004e-16	1.00475e-14	hypothetical protein	#
CNAG_01851		4.10047	up	0.000754461	0.00632796	hypothetical protein	#
CNAG_05159		4.10437	up	5.9524e-10	2.06195e-08	hypothetical protein, hypothetical protein, variant	#
CNAG_03122		4.1061	up	2.43472e-13	1.22677e-11	hypothetical protein	#
CNAG_06209		4.10825	up	7.58427e-05	0.000875746	hypothetical protein	#
CNAG_05586		4.1102	up	3.68139e-25	4.53424e-23	hypothetical protein, hypothetical protein, variant	#
CNAG_06124		4.11049	up	0.000692336	0.00588087	hypothetical protein, hypothetical protein, variant	#
CNAG_06707		4.13504	up	0.000646205	0.00557446	hypothetical protein	#
CNAG_02899		4.17439	up	4.72533e-12	2.05413e-10	hypothetical protein	#
CNAG_07702		4.18295	up	8.78176e-07	1.67357e-05	hypothetical protein	#
CNAG_07823		4.1907	up	2.05931e-10	7.48442e-09	solute carrier family 35 (UDP-galactose transporter), member B1	#
CNAG_07520		4.21044	up	2.1789e-10	7.84675e-09	endopeptidase, endopeptidase, variant 1, endopeptidase, variant 2	#
CNAG_07203		4.22228	up	1.10579e-08	3.1701e-07	hypothetical protein	#
CNAG_03644	CAS3	4.23552	up	1.31921e-10	4.8745e-09	hypothetical protein	#
CNAG_03934		4.24391	up	4.56408e-05	0.000559036	hypothetical protein	#
CNAG_07885		4.27429	up	0.000444426	0.00406586	hypothetical protein	#
CNAG_03518		4.29035	up	0.000498679	0.00448205	phenylacrylic acid decarboxylase	#
CNAG_05885		4.31109	up	0.000383433	0.00359185	hypothetical protein	#
CNAG_00306		4.31226	up	8.78117e-69	3.07387e-66	hypothetical protein	#
CNAG_05201		4.31458	up	3.55549e-17	2.59864e-15	DNA mismatch repair protein MSH4	#
CNAG_05930		4.36059	up	1.89348e-103	9.68735e-101	hypothetical protein	#
CNAG_05087		4.36975	up	0.00032672	0.00314474	hypothetical protein	#
CNAG_02169		4.37795	up	2.7219e-09	8.70354e-08	hypothetical protein	#
CNAG_03838		4.37925	up	2.97514e-09	9.46778e-08	hypothetical protein	#
CNAG_00080		4.40096	up	0.000301495	0.0029231	hypothetical protein	#
CNAG_01171		4.42595	up	4.29756e-11	1.68136e-09	hypothetical protein	#
CNAG_05472		4.42664	up	2.34417e-05	0.000309962	meiotic recombination protein SPO11, meiotic recombination protein SPO11, variant 1, meiotic recombination protein SPO11, variant 2	#
CNAG_02321		4.43079	up	0.000288148	0.00283502	hypothetical protein	#
CNAG_02802		4.43823	up	1.71208e-13	8.75925e-12	inositol/phosphatidylinositol kinase, inositol/phosphatidylinositol kinase, variant	#
CNAG_05061		4.46962	up	0.000238077	0.00239554	hypothetical protein, hypothetical protein, variant	#
CNAG_08007		4.47306	up	0.000236684	0.00238513	hypothetical protein	#
CNAG_05870		4.4823	up	1.46641e-13	7.6796e-12	hypothetical protein, hypothetical protein, variant	#
CNAG_06653		4.48625	up	1.15286e-11	4.7923e-10	hypothetical protein, hypothetical protein, variant	#
CNAG_07869		4.55456	up	1.96437e-20	1.84014e-18	hypothetical protein	#
CNAG_06551		4.55944	up	1.01742e-13	5.37953e-12	carnitine O-acetyltransferase	#
CNAG_02441		4.57776	up	0.00016708	0.00174725	hypothetical protein	#
CNAG_04143		4.586	up	1.07219e-05	0.000157768	hypothetical protein, hypothetical protein, variant	#
CNAG_06099		4.61042	up	1.00456e-05	0.000148474	hypothetical protein	#
CNAG_05018		4.61333	up	2.2561e-16	1.56305e-14	hypothetical protein, hypothetical protein, variant	#
CNAG_04869	PNB1	4.62263	up	8.26551e-81	3.43587e-78	para-nitrobenzyl esterase	#
CNAG_04865		4.6232	up	9.7305e-06	0.000145107	mannitol dehydrogenase	#
CNAG_05147		4.62439	up	7.71398e-21	7.43561e-19	hypothetical protein	#
CNAG_05281		4.62488	up	9.14048e-08	2.18681e-06	hypothetical protein, hypothetical protein, variant	#
CNAG_07456		4.63827	up	1.67105e-15	1.11141e-13	hypothetical protein, hypothetical protein, variant	#
CNAG_01056		4.64435	up	9.04236e-06	0.000136374	hypothetical protein	#
CNAG_05443		4.69212	up	6.81052e-06	0.000106581	hypothetical protein	#
CNAG_07723		4.69398	up	0.000119039	0.00130648	hypothetical protein	#
CNAG_05264		4.69963	up	2.56032e-41	5.67623e-39	alpha-amylase AmyA, alpha-amylase AmyA, variant	#
CNAG_01953		4.70824	up	1.33594e-12	6.08792e-11	hypothetical protein	#
CNAG_04454		4.74586	up	3.14257e-08	8.36049e-07	hypothetical protein	#
CNAG_03204		4.7614	up	5.80624e-15	3.47903e-13	hypothetical protein	#
CNAG_02118		4.7615	up	7.75246e-24	9.0459e-22	hypothetical protein	#
CNAG_03894	PDR802	4.78321	up	1.38307e-44	3.538e-42	hypothetical protein	#
CNAG_05678		4.78361	up	3.30779e-60	1.10001e-57	membrane protein	#
CNAG_04138		4.81927	up	7.39178e-05	0.000857988	hypothetical protein	#
CNAG_07662		4.82239	up	9.55609e-05	0.00107908	hypothetical protein	#
CNAG_01187		4.85248	up	5.0288e-15	3.06849e-13	ribosome production factor 2	#
CNAG_06844		4.91504	up	6.25369e-05	0.000729707	hypothetical protein	#
CNAG_03614		4.9284	up	2.4271e-06	4.1929e-05	hypothetical protein	#
CNAG_04736		4.98678	up	1.60003e-28	2.36484e-26	hypothetical protein	#
CNAG_02420		5.00593	up	4.37927e-05	0.000538784	hypothetical protein, hypothetical protein, variant	#
CNAG_01706		5.01702	up	4.61018e-09	1.43282e-07	hypothetical protein	#
CNAG_04947		5.08979	up	8.09814e-12	3.43062e-10	high-affinity nicotinic acid transporter, high-affinity nicotinic acid transporter, variant 1, high-affinity nicotinic acid transporter, variant 2	#
CNAG_04060		5.10629	up	6.61024e-12	2.81825e-10	hypothetical protein	#
CNAG_00164		5.11279	up	2.21078e-14	1.26758e-12	hypothetical protein	#
CNAG_01796		5.12118	up	4.21855e-92	2.00411e-89	hypothetical protein, hypothetical protein, variant 1, hypothetical protein, variant 2, hypothetical protein, variant 3	#
CNAG_03421		5.12934	up	2.35625e-09	7.57074e-08	hypothetical protein	#
CNAG_02040		5.1399	up	1.16431e-21	1.1733e-19	hypothetical protein	#
CNAG_02849		5.14097	up	2.19305e-11	8.89387e-10	glutathione transferase	#
CNAG_01865		5.18922	up	7.55488e-48	2.09365e-45	hypothetical protein	#
CNAG_04508		5.21354	up	6.60813e-07	1.28511e-05	hypothetical protein	#
CNAG_07963		5.21429	up	2.86407e-05	0.000374242	hypothetical protein	#
CNAG_05879		5.2151	up	2.1968e-05	0.000292803	hypothetical protein	#
CNAG_07492		5.22498	up	3.12717e-12	1.36834e-10	hypothetical protein	#
CNAG_04707		5.22523	up	4.01431e-15	2.47215e-13	hypothetical protein	#
CNAG_03398	ZIP2	5.26558	up	1.62042e-12	7.33159e-11	zinc ion transporter	#
CNAG_02044		5.32214	up	3.10542e-38	5.73727e-36	hypothetical protein	#
CNAG_07737		5.34116	up	1.52477e-05	0.00021216	hypothetical protein	#
CNAG_01977		5.34269	up	3.93743e-07	8.00851e-06	hypothetical protein	#
CNAG_05160		5.40862	up	3.91268e-10	1.39162e-08	hypothetical protein	#
CNAG_02777	PHO84	5.41648	up	8.53134e-16	5.79e-14	phosphate:H symporter, phosphate:H symporter, variant	#
CNAG_05265		5.42298	up	8.50743e-150	5.65829e-147	hypothetical protein	#
CNAG_00165		5.47238	up	6.20146e-42	1.42227e-39	methylthioadenosine phosphorylase	#
CNAG_07644		5.54346	up	7.81104e-06	0.000119428	hypothetical protein	#
CNAG_04337		5.54547	up	8.29885e-06	0.000125757	cation diffusion facilitator	#
CNAG_04874		5.70648	up	8.25826e-41	1.66441e-38	hypothetical protein	#
CNAG_00331		5.77572	up	1.03937e-57	3.29182e-55	anon-23da protein	#
CNAG_03085		5.79223	up	7.78105e-18	6.01765e-16	hypothetical protein	#
CNAG_04446		5.79463	up	2.51382e-11	1.0072e-09	hypothetical protein	#
CNAG_04280		5.8123	up	0.000170289	0.00177522	hypothetical protein	#
CNAG_06662		5.83161	up	3.71434e-08	9.65002e-07	hypothetical protein	#
CNAG_00262		5.85838	up	1.86508e-11	7.65718e-10	hypothetical protein, hypothetical protein, variant	#
CNAG_06917		5.86057	up	2.12162e-165	2.35181e-162	thiol-specific antioxidant protein 3	#
CNAG_00795	CFL1	5.86519	up	2.51802e-06	4.31632e-05	hypothetical protein	#
CNAG_05305		6.05241	up	1.56744e-06	2.81482e-05	hypothetical protein	#
CNAG_01993		6.10896	up	6.79916e-23	7.53687e-21	hypothetical protein	#
CNAG_05289		6.11046	up	2.9455e-12	1.29738e-10	hypothetical protein	#
CNAG_05266		6.13655	up	3.07082e-30	4.74977e-28	membrane protein, membrane protein, variant	#
CNAG_07648		6.15932	up	1.18992e-06	2.19229e-05	hypothetical protein	#
CNAG_00979	CTR4	6.22231	up	3.8693e-176	6.43368e-173	solute carrier family 31 (copper transporter), member 1, solute carrier family 31 (copper transporter), member 1, variant 1, solute carrier family 31 (copper transporter), member 1, variant 2, solute carrier family 31 (copper transporter), member 1, variant 3	#
CNAG_06241	CFO1	6.25089	up	4.5127e-148	2.72854e-145	ferroxidase/laccase	#
CNAG_00919		6.2582	up	3.2586e-153	2.70912e-150	carboxypeptidase D	#
CNAG_06242	CFT1	6.33794	up	4.77785e-105	2.64812e-102	major iron permease	#
CNAG_03848		6.35611	up	3.58941e-39	6.8209e-37	glutathione transferase, glutathione transferase, variant	#
CNAG_04216		6.56602	up	1.60267e-09	5.32968e-08	hypothetical protein	#
CNAG_06389		6.57883	up	6.82184e-90	3.0248e-87	hypothetical protein	#
CNAG_07367		6.74299	up	9.78208e-05	0.00110086	amino acid transporter, amino acid transporter, variant	#
CNAG_00699		6.80155	up	0	0	transmembrane receptor	#
CNAG_07658		6.83057	up	4.02591e-10	1.42427e-08	hypothetical protein	#
CNAG_02192		7.12607	up	8.9221e-07	1.69545e-05	hypothetical protein	#
CNAG_07784		7.62356	up	1.18167e-168	1.57186e-165	hypothetical protein	#
CNAG_00679		7.66052	up	1.74445e-27	2.41715e-25	hypothetical protein	#
CNAG_05075		8.14863	up	2.41439e-156	2.29401e-153	solute carrier family 20 (sodium-dependent phosphate transporter)	#
CNAG_02489		8.15763	up	5.6702e-45	1.5085e-42	alcohol dehydrogenase, propanol-preferring	#
CNAG_05278		8.34222	up	4.70335e-151	3.47577e-148	hypothetical protein, hypothetical protein, variant	#
CNAG_06346	BLP1	8.47023	up	0	0	hypothetical protein	#
CNAG_01980		11.1948	up	6.84044e-40	1.33811e-37	hypothetical protein	#
CNAG_06312		12.061	up	3.07467e-76	1.20292e-73	hypothetical protein, hypothetical protein, variant	#
CNAG_01653	CIG1	12.3057	up	1.80011e-197	3.99084e-194	cytokine inducing-glycoprotein	#
