# Supplementary material for: Unveil the transcriptional landscape at the Cryptococcus-host axis in mice and nonhuman primates
Source: PLoS Negl Trop Dis. 2019 Jul 22;13(7):e0007566. doi: 10.1371/journal.pntd.0007566 (PMC6675133; doi:10.1371/journal.pntd.0007566)
Supplement: S4 Table — (XLSX) [file pntd.0007566.s008.xlsx]

## Sheet: KEGG analysis
Table S4. KEGG and GO analyses of C. neoformans transcriptome in mouse lung tissues.
Description	Database	KEGG ID	Input number	Background number	P-Value	Corrected P-Value	Input	Hyperlink
Ribosome biogenesis in eukaryotes	KEGG PATHWAY	cnb03008	23	64	0.00100159	0.0801274	J9VQ03NOG2|J9VGV1CNAG_00449|J9W3D8CNAG_06468|J9VTR3CNAG_07864|J9VTN6CNAG_01608|J9VSU5CNAG_07855|J9W146CNAG_06472|T2BQQ8CNAG_03645|J9VNH4CNAG_05694|J9VWY9CNAG_01687|J9VHR4CNAG_00775|J9VLW1CNAG_02378|J9VI77CNAG_03602|J9VVA5CNAG_02175|J9VN14CNAG_02720|J9VKA3CNAG_06766|T2BPS6CNAG_01608|J9VN31CNAG_02162|J9VN70CNAG_03645|J9W465CNAG_05597|J9VF89CNAG_06798|J9VQP6CNAG_02672|J9VSN7CNAG_04770	http://www.genome.jp/kegg-bin/show_pathway?cnb03008/cnb:CNBJ1480%09red/cnb:CNBN1850%09red/cnb:CNBF1910%09red/cnb:CNBL2420%09red/cnb:CNBK1940%09red/cnb:CNBJ3400%09red/cnb:CNBE1700%09red/cnb:CNBB4660%09red/cnb:CNBJ2090%09red/cnb:CNBE3620%09red/cnb:CNBN1890%09red/cnb:CNBD0720%09red/cnb:CNBB4270%09red/cnb:CNBB5340%09red/cnb:CNBA7350%09red/cnb:CNBA4130%09red/cnb:CNBC3750%09red/cnb:CNBC6070%09red/cnb:C…	#
Taurine and hypotaurine metabolism	KEGG PATHWAY	cnb00430	5	6	0.0103822	0.41529	J9VHX4CNAG_02888|J9VQ18CNAG_03128|T2BMX6CNAG_03128|J9W3A6CNAG_06432|J9VNW0CNAG_01026	http://www.genome.jp/kegg-bin/show_pathway?cnb00430/cnb:CNBN1520%09red/cnb:CNBC2150%09red/cnb:CNBG0340%09red/cnb:CNBD4760%09red	#
Cyanoamino acid metabolism	KEGG PATHWAY	cnb00460	4	7	0.0506723	0.999998	J9VHX4CNAG_02888|J9VQ18CNAG_03128|T2BMX6CNAG_03128|J9VNW0CNAG_01026	http://www.genome.jp/kegg-bin/show_pathway?cnb00460/cnb:CNBC2150%09red/cnb:CNBG0340%09red/cnb:CNBD4760%09red	#
Pyruvate metabolism	KEGG PATHWAY	cnb00620	10	33	0.0582294	0.999998	J9VNN1CNAG_01120|J9VLE0CNAG_01078|J9W3A6CNAG_06432|J9W232CNAG_05653|J9VTB3CNAG_07660|J9VKD7CNAG_01229|J9VRH6CNAG_04326|J9VJC0CNAG_05059|J9VZB1CNAG_01777|J9VTZ1CNAG_05759	http://www.genome.jp/kegg-bin/show_pathway?cnb00620/cnb:CNBD2850%09red/cnb:CNBF2520%09red/cnb:CNBF0450%09red/cnb:CNBD4300%09red/cnb:CNBH2110%09red/cnb:CNBN1520%09red/cnb:CNBL2980%09red/cnb:CNBI1220%09red/cnb:CNBD3910%09red/cnb:CNBC4460%09red	#
Glycolysis / Gluconeogenesis	KEGG PATHWAY	cnb00010	10	36	0.0855139	0.999998	J9VTH3CNAG_04659|J9VNN1CNAG_01120|J9VKH0CNAG_00057|J9VLE0CNAG_01078|J9VUE6CNAG_02489|J9VI18CNAG_06770|J9VTB3CNAG_07660|J9VJC0CNAG_05059|J9VRZ1CNAG_04523|J9VTL4CNAG_07745	http://www.genome.jp/kegg-bin/show_pathway?cnb00010/cnb:CNBB5380%09red/cnb:CNBA0460%09red/cnb:CNBF0450%09red/cnb:CNBG4180%09red/cnb:CNBD4300%09red/cnb:CNBE0650%09red/cnb:CNBH0320%09red/cnb:CNBI1220%09red/cnb:CNBD3910%09red/cnb:CNBJ2540%09red	#
Carbon metabolism	KEGG PATHWAY	cnb01200	21	96	0.107247	0.999998	J9VKH0CNAG_00057|J9VST7CNAG_03226|J9VIT4CNAG_07356|J9VJW0CNAG_05256|J9VJC0CNAG_05059|J9VU59CNAG_04189|J9VMK3CNAG_00760|J9W3A6CNAG_06432|J9W232CNAG_05653|J9VI18CNAG_06770|J9VTB3CNAG_07660|J9VNN1CNAG_01120|J9VJV4CNAG_01395|J9VNC5CNAG_06672|J9VRH6CNAG_04326|J9VHV5CNAG_00061|J9VSV4CNAG_03245|J9VXY3CNAG_04753|J9VRZ1CNAG_04523|J9VNI7CNAG_06913|J9VIR0CNAG_07808	http://www.genome.jp/kegg-bin/show_pathway?cnb01200/cnb:CNBB5380%09red/cnb:CNBG1480%09red/cnb:CNBF0450%09red/cnb:CNBA0460%09red/cnb:CNBH3130%09red/cnb:CNBA0490%09red/cnb:CNBF1330%09red/cnb:CNBG1290%09red/cnb:CNBA3400%09red/cnb:CNBH0320%09red/cnb:CNBN1520%09red/cnb:CNBI1220%09red/cnb:CNBK3250%09red/cnb:CNBL2980%09red/cnb:CNBI3030%09red/cnb:CNBJ1630%09red/cnb:CNBI1360%09red/cnb:CNBA7210%09red/cnb:C…	#
Citrate cycle (TCA cycle)	KEGG PATHWAY	cnb00020	7	24	0.117577	0.999998	J9VNN1CNAG_01120|J9VU59CNAG_04189|J9VHV5CNAG_00061|J9VTB3CNAG_07660|J9VJC0CNAG_05059|J9VST7CNAG_03226|J9VIT4CNAG_07356	http://www.genome.jp/kegg-bin/show_pathway?cnb00020/cnb:CNBH3130%09red/cnb:CNBA0490%09red/cnb:CNBF0450%09red/cnb:CNBA3400%09red/cnb:CNBG1290%09red/cnb:CNBI1220%09red/cnb:CNBD3910%09red	#
Selenocompound metabolism	KEGG PATHWAY	cnb00450	3	7	0.144119	0.999998	J9VW29CNAG_06448|J9VYS6CNAG_01609|Q8TG24MET3	http://www.genome.jp/kegg-bin/show_pathway?cnb00450/cnb:CNBH3400%09red/cnb:CNBC6060%09red/cnb:CNBN1680%09red	#
Pentose phosphate pathway	KEGG PATHWAY	cnb00030	6	22	0.17062	0.999998	J9VXY3CNAG_04753|J9VR37CNAG_06923|J9VI18CNAG_06770|J9VJV4CNAG_01395|J9VSV4CNAG_03245|J9VKH0CNAG_00057	http://www.genome.jp/kegg-bin/show_pathway?cnb00030/cnb:CNBB5380%09red/cnb:CNBG1480%09red/cnb:CNBA0460%09red/cnb:CNBK3360%09red/cnb:CNBJ1630%09red/cnb:CNBD1280%09red	#
Glyoxylate and dicarboxylate metabolism	KEGG PATHWAY	cnb00630	6	24	0.214515	0.999998	J9VJW0CNAG_05256|J9W232CNAG_05653|J9VNC5CNAG_06672|J9VHV5CNAG_00061|J9VZB1CNAG_01777|J9VIR0CNAG_07808	http://www.genome.jp/kegg-bin/show_pathway?cnb00630/cnb:CNBA0490%09red/cnb:CNBF1330%09red/cnb:CNBL2980%09red/cnb:CNBI3030%09red/cnb:CNBI1360%09red/cnb:CNBC4460%09red	#
Glutathione metabolism	KEGG PATHWAY	cnb00480	6	24	0.214515	0.999998	J9VHX4CNAG_02888|T2BMX6CNAG_03128|J9VNW0CNAG_01026|J9VPM0CNAG_02464|J9VQ18CNAG_03128|J9VSV4CNAG_03245	http://www.genome.jp/kegg-bin/show_pathway?cnb00480/cnb:CNBE0900%09red/cnb:CNBD4760%09red/cnb:CNBG1480%09red/cnb:CNBG0340%09red/cnb:CNBC2150%09red	#
Pentose and glucuronate interconversions	KEGG PATHWAY	cnb00040	5	19	0.219041	0.999998	J9VU15CNAG_01558|J9VLE0CNAG_01078|J9VD96CNAG_00126|J9VVW1CNAG_04677|J9VFX5CNAG_00115	http://www.genome.jp/kegg-bin/show_pathway?cnb00040/cnb:CNBC0940%09red/cnb:CNBJ2380%09red/cnb:CNBA1020%09red/cnb:CNBD4300%09red/cnb:CNBA1120%09red	#
Nicotinate and nicotinamide metabolism	KEGG PATHWAY	cnb00760	4	14	0.220906	0.999998	J9VTS1CNAG_01027|J9VRT3CNAG_04467|J9VQS5CNAG_03396|J9W002CNAG_04866	http://www.genome.jp/kegg-bin/show_pathway?cnb00760/cnb:CNBJ0580%09red/cnb:CNBD4750%09red/cnb:CNBH0860%09red/cnb:CNBG2900%09red	#
Fatty acid biosynthesis	KEGG PATHWAY	cnb00061	2	5	0.24385	0.999998	J9VTZ1CNAG_05759|J9VSX5CNAG_02100	http://www.genome.jp/kegg-bin/show_pathway?cnb00061/cnb:CNBF2520%09red/cnb:CNBE4360%09red	#
Biosynthesis of antibiotics	KEGG PATHWAY	cnb01130	37	208	0.265062	0.999998	J9VIT4CNAG_07356|J9VUE6CNAG_02489|J9VTB3CNAG_07660|J9VW29CNAG_06448|J9VYL3CNAG_01539|J9VST7CNAG_03226|J9VQ71CNAG_02270|J9VLS4CNAG_00519|J9VIE2CNAG_04951|J9VRT5CNAG_05125|J9VI18CNAG_06770|J9VIR0CNAG_07808|J9VNI7CNAG_06913|J9VSV4CNAG_03245|J9VJC0CNAG_05059|J9VTL4CNAG_07745|J9VNN1CNAG_01120|J9VJW0CNAG_05256|J9VIS3CNAG_07354|J9VLE0CNAG_01078|J9VT67CNAG_06534|J9VQ15CNAG_02896|J9VKH0CNAG_00057|J9VVB2AD…	http://www.genome.jp/kegg-bin/show_pathway?cnb01130/cnb:CNBA3110%09red/cnb:CNBA0460%09red/cnb:CNBL2420%09red/cnb:CNBC0340%09red/cnb:CNBG4180%09red/cnb:CNBA3400%09red/cnb:CNBI1880%09red/cnb:CNBH3400%09red/cnb:CNBG1480%09red/cnb:CNBC2090%09red/cnb:CNBK0080%09red/cnb:CNBA0490%09red/cnb:CNBF0450%09red/cnb:CNBC0760%09red/cnb:CNBC6060%09red/cnb:CNBG1290%09red/cnb:CNBI1220%09red/cnb:CNBD3910%09red/cnb:C…	#
Ascorbate and aldarate metabolism	KEGG PATHWAY	cnb00053	3	11	0.293825	0.999998	J9VLE0CNAG_01078|J9VXY3CNAG_04753|J9VNV8CNAG_06623	http://www.genome.jp/kegg-bin/show_pathway?cnb00053/cnb:CNBJ1630%09red/cnb:CNBF0890%09red/cnb:CNBD4300%09red	#
Sulfur metabolism	KEGG PATHWAY	cnb00920	3	11	0.293825	0.999998	Q8TG24MET3|J9VYS6CNAG_01609|J9VIS3CNAG_07354	http://www.genome.jp/kegg-bin/show_pathway?cnb00920/cnb:CNBA3110%09red/cnb:CNBC6060%09red/cnb:CNBH3400%09red	#
Methane metabolism	KEGG PATHWAY	cnb00680	5	22	0.300675	0.999998	J9VNC5CNAG_06672|J9W3A6CNAG_06432|J9VKH0CNAG_00057|J9VI18CNAG_06770|J9VIR0CNAG_07808	http://www.genome.jp/kegg-bin/show_pathway?cnb00680/cnb:CNBB5380%09red/cnb:CNBN1520%09red/cnb:CNBI1360%09red/cnb:CNBA0460%09red/cnb:CNBF1330%09red	#
Terpenoid backbone biosynthesis	KEGG PATHWAY	cnb00900	4	17	0.316353	0.999998	J9VRT5CNAG_05125|J9VZX1CNAG_06001|J9VT67CNAG_06534|J9VQ15CNAG_02896	http://www.genome.jp/kegg-bin/show_pathway?cnb00900/cnb:CNBI1880%09red/cnb:CNBC2090%09red/cnb:CNBF0070%09red/cnb:CNBM0120%09red	#
Tyrosine metabolism	KEGG PATHWAY	cnb00350	4	19	0.381834	0.999998	J9VTS1CNAG_01027|J9VUE6CNAG_02489|J9VRT3CNAG_04467|J9VTL4CNAG_07745	http://www.genome.jp/kegg-bin/show_pathway?cnb00350/cnb:CNBG4180%09red/cnb:CNBD4750%09red/cnb:CNBH0860%09red/cnb:CNBE0650%09red	#
Butanoate metabolism	KEGG PATHWAY	cnb00650	4	20	0.414393	0.999998	J9VQ60CNAG_02852|J9VTS1CNAG_01027|J9VRT3CNAG_04467|J9VQ15CNAG_02896	http://www.genome.jp/kegg-bin/show_pathway?cnb00650/cnb:CNBC2490%09red/cnb:CNBC2090%09red/cnb:CNBD4750%09red/cnb:CNBH0860%09red	#
RNA polymerase	KEGG PATHWAY	cnb03020	5	27	0.442859	0.999998	J9VN76CNAG_06611|J9VTD6CNAG_01179|J9VTJ7CNAG_03521|J9VX92CNAG_01810|J9VQR8CNAG_07536	http://www.genome.jp/kegg-bin/show_pathway?cnb03020/cnb:CNBC4220%09red/cnb:CNBF0780%09red/cnb:CNBG4050%09red/cnb:CNBK2180%09red/cnb:CNBD3310%09red	#
Ubiquinone and other terpenoid-quinone biosynthesis	KEGG PATHWAY	cnb00130	2	9	0.452026	0.999998	J9VWM3COQ6|J9VWT3CNAG_01667	http://www.genome.jp/kegg-bin/show_pathway?cnb00130/cnb:CNBC5470%09red/cnb:CNBH3840%09red	#
Fatty acid degradation	KEGG PATHWAY	cnb00071	4	22	0.478144	0.999998	J9VSX7CNAG_03275|J9VLE0CNAG_01078|J9VTL4CNAG_07745|J9VUE6CNAG_02489	http://www.genome.jp/kegg-bin/show_pathway?cnb00071/cnb:CNBG4180%09red/cnb:CNBG1740%09red/cnb:CNBE0650%09red/cnb:CNBD4300%09red	#
Inositol phosphate metabolism	KEGG PATHWAY	cnb00562	4	23	0.509009	0.999998	J9VPQ5CNAG_05329|J9VYL3CNAG_01539|J9VYF4CNAG_07744|J9VNV8CNAG_06623	http://www.genome.jp/kegg-bin/show_pathway?cnb00562/cnb:CNBC0760%09red/cnb:CNBG4170%09red/cnb:CNBC0340%09red/cnb:CNBF0890%09red	#
Starch and sucrose metabolism	KEGG PATHWAY	cnb00500	5	32	0.577057	0.999998	T2BM44CNAG_05264|J9VS96CNAG_04879|J9VL57CNAG_06924|J9VDZ5CNAG_00122|J9VJA3CNAG_05264	http://www.genome.jp/kegg-bin/show_pathway?cnb00500/cnb:CNBI3110%09red/cnb:CNBA1080%09red/cnb:CNBJ0440%09red/cnb:CNBK3370%09red	#
Synthesis and degradation of ketone bodies	KEGG PATHWAY	cnb00072	1	5	0.583428	0.999998	J9VQ15CNAG_02896	http://www.genome.jp/kegg-bin/show_pathway?cnb00072/cnb:CNBC2090%09red	#
One carbon pool by folate	KEGG PATHWAY	cnb00670	2	12	0.585309	0.999998	J9VW74CNAG_06645|J9VMK3CNAG_00760	http://www.genome.jp/kegg-bin/show_pathway?cnb00670/cnb:CNBF1110%09red/cnb:CNBA7210%09red	#
Propanoate metabolism	KEGG PATHWAY	cnb00640	3	20	0.621642	0.999998	J9W3A6CNAG_06432|J9VQ60CNAG_02852|J9VTZ1CNAG_05759	http://www.genome.jp/kegg-bin/show_pathway?cnb00640/cnb:CNBC2490%09red/cnb:CNBF2520%09red/cnb:CNBN1520%09red	#
Alanine, aspartate and glutamate metabolism	KEGG PATHWAY	cnb00250	4	27	0.622961	0.999998	J9VQ60CNAG_02852|J9VTS1CNAG_01027|J9VRT3CNAG_04467|J9VIR0CNAG_07808	http://www.genome.jp/kegg-bin/show_pathway?cnb00250/cnb:CNBC2490%09red/cnb:CNBI1360%09red/cnb:CNBD4750%09red/cnb:CNBH0860%09red	#
Steroid biosynthesis	KEGG PATHWAY	cnb00100	2	13	0.624065	0.999998	J9VLS4CNAG_00519|J9VZ79CNAG_01737	http://www.genome.jp/kegg-bin/show_pathway?cnb00100/cnb:CNBC4830%09red/cnb:CNBA4830%09red	#
Glycine, serine and threonine metabolism	KEGG PATHWAY	cnb00260	5	35	0.648755	0.999998	J9VW29CNAG_06448|J9VNI7CNAG_06913|J9VZB1CNAG_01777|J9VIR0CNAG_07808|J9VSJ0CNAG_04519	http://www.genome.jp/kegg-bin/show_pathway?cnb00260/cnb:CNBH0370%09red/cnb:CNBI1360%09red/cnb:CNBC4460%09red/cnb:CNBN1680%09red/cnb:CNBK3250%09red	#
Purine metabolism	KEGG PATHWAY	cnb00230	11	77	0.663517	0.999998	J9VTD6CNAG_01179|J9VM32CNAG_05226|Q8TG24MET3|J9VX92CNAG_01810|J9VN76CNAG_06611|J9VJU8CNAG_02986|J9W465CNAG_05597|J9VVB2ADK1|J9VQ84CNAG_01364|J9VTJ7CNAG_03521|J9VQR8CNAG_07536	http://www.genome.jp/kegg-bin/show_pathway?cnb00230/cnb:CNBC4220%09red/cnb:CNBK0080%09red/cnb:CNBL2420%09red/cnb:CNBD3310%09red/cnb:CNBC1230%09red/cnb:CNBF0780%09red/cnb:CNBD1530%09red/cnb:CNBK2180%09red/cnb:CNBG4050%09red/cnb:CNBI2740%09red/cnb:CNBH3400%09red	#
Cysteine and methionine metabolism	KEGG PATHWAY	cnb00270	5	36	0.670867	0.999998	J9VDD8CNAG_00165|J9VNI7CNAG_06913|J9VQ71CNAG_02270|J9VYS6CNAG_01609|J9VW29CNAG_06448	http://www.genome.jp/kegg-bin/show_pathway?cnb00270/cnb:CNBA1480%09red/cnb:CNBK3250%09red/cnb:CNBE2760%09red/cnb:CNBC6060%09red/cnb:CNBN1680%09red	#
Tryptophan metabolism	KEGG PATHWAY	cnb00380	4	29	0.673226	0.999998	J9VSX7CNAG_03275|J9VLE0CNAG_01078|J9VS95CNAG_02365|J9VJW0CNAG_05256	http://www.genome.jp/kegg-bin/show_pathway?cnb00380/cnb:CNBE1810%09red/cnb:CNBG1740%09red/cnb:CNBD4300%09red/cnb:CNBI3030%09red	#
Lysine degradation	KEGG PATHWAY	cnb00310	4	29	0.673226	0.999998	J9VTS1CNAG_01027|J9VLE0CNAG_01078|J9VRT3CNAG_04467|J9VSX7CNAG_03275	http://www.genome.jp/kegg-bin/show_pathway?cnb00310/cnb:CNBD4750%09red/cnb:CNBH0860%09red/cnb:CNBG1740%09red/cnb:CNBD4300%09red	#
MAPK signaling pathway - yeast	KEGG PATHWAY	cnb04011	7	51	0.689193	0.999998	J9W3R7CNAG_05427|J9VIP8CNAG_05063|J9VLD9CNAG_02531|J9VTV9CNAG_04119|J9VMJ4CNAG_06808|J9VJW0CNAG_05256|J9VFY6CNAG_00125	http://www.genome.jp/kegg-bin/show_pathway?cnb04011/cnb:CNBI1260%09red/cnb:CNBL0880%09red/cnb:CNBH4090%09red/cnb:CNBD0590%09red/cnb:CNBI3030%09red/cnb:CNBE0270%09red/cnb:CNBA1110%09red	#
Oxidative phosphorylation	KEGG PATHWAY	cnb00190	11	79	0.69302	0.999998	J9VUE0CNAG_05909|J9VLI2CNAG_05041|J9VU59CNAG_04189|J9VP03CNAG_07177|J9VEL3CNAG_00329|J9VPD8CNAG_05179|J9VIT4CNAG_07356|J9VST7CNAG_03226|J9VP87CNAG_04000|J9VK09CNAG_02916|J9VQC2CNAG_01323	http://www.genome.jp/kegg-bin/show_pathway?cnb00190/cnb:CNBC1910%09red/cnb:CNBA3010%09red/cnb:CNBH3130%09red/cnb:CNBD1890%09red/cnb:CNBF1440%09red/cnb:CNBA3400%09red/cnb:CNBF4050%09red/cnb:CNBB0900%09red/cnb:CNBI1060%09red/cnb:CNBG1290%09red/cnb:CNBI2370%09red	#
Arginine and proline metabolism	KEGG PATHWAY	cnb00330	3	24	0.729928	0.999998	J9VF76CNAG_00613|J9VLE0CNAG_01078|J9VS95CNAG_02365	http://www.genome.jp/kegg-bin/show_pathway?cnb00330/cnb:CNBA5760%09red/cnb:CNBE1810%09red/cnb:CNBD4300%09red	#
Fructose and mannose metabolism	KEGG PATHWAY	cnb00051	3	25	0.752838	0.999998	J9VVW1CNAG_04677|J9VKH0CNAG_00057|J9VI18CNAG_06770	http://www.genome.jp/kegg-bin/show_pathway?cnb00051/cnb:CNBB5380%09red/cnb:CNBJ2380%09red/cnb:CNBA0460%09red	#
Proteasome	KEGG PATHWAY	cnb03050	4	33	0.759243	0.999998	J9VJ37CNAG_00482|J9VVD8CNAG_06175|J9VFT0CNAG_03721|J9VRS2CNAG_05792	http://www.genome.jp/kegg-bin/show_pathway?cnb03050/cnb:CNBA4450%09red/cnb:CNBM1640%09red/cnb:CNBF2840%09red/cnb:CNBB3520%09red	#
Peroxisome	KEGG PATHWAY	cnb04146	5	41	0.767216	0.999998	J9VEA4CNAG_00516|J9VRG8CNAG_05045|J9VJW0CNAG_05256|J9VQS5CNAG_03396|J9VIR0CNAG_07808	http://www.genome.jp/kegg-bin/show_pathway?cnb04146/cnb:CNBI1360%09red/cnb:CNBG2900%09red/cnb:CNBA4800%09red/cnb:CNBI1100%09red/cnb:CNBI3030%09red	#
Biosynthesis of secondary metabolites	KEGG PATHWAY	cnb01110	37	264	0.770545	0.999998	J9VIT4CNAG_07356|J9VQ15CNAG_02896|J9VUE6CNAG_02489|J9VTB3CNAG_07660|J9VST7CNAG_03226|J9VLS4CNAG_00519|J9VRX8CNAG_02460|J9VPE8CNAG_05809|J9VIE2CNAG_04951|J9VRT5CNAG_05125|J9W232CNAG_05653|J9VI18CNAG_06770|J9VMS4CNAG_02814|J9VNI7CNAG_06913|J9VSV4CNAG_03245|J9VJC0CNAG_05059|J9VTL4CNAG_07745|J9VNN1CNAG_01120|J9VJW0CNAG_05256|J9VLE0CNAG_01078|J9VT67CNAG_06534|J9VWT3CNAG_01667|J9VKH0CNAG_00057|J9VVB2AD…	http://www.genome.jp/kegg-bin/show_pathway?cnb01110/cnb:CNBH3840%09red/cnb:CNBA0460%09red/cnb:CNBL2420%09red/cnb:CNBG4180%09red/cnb:CNBA3400%09red/cnb:CNBI1880%09red/cnb:CNBC4460%09red/cnb:CNBG1480%09red/cnb:CNBC2090%09red/cnb:CNBK0080%09red/cnb:CNBF3010%09red/cnb:CNBA0490%09red/cnb:CNBF0450%09red/cnb:CNBC6060%09red/cnb:CNBC2870%09red/cnb:CNBI3030%09red/cnb:CNBI1220%09red/cnb:CNBD3910%09red/cnb:C…	#
Regulation of mitophagy - yeast	KEGG PATHWAY	cnb04139	3	27	0.793944	0.999998	J9VWF1MDM10|J9VNH4CNAG_05694|J9VYX4CNAG_06418	http://www.genome.jp/kegg-bin/show_pathway?cnb04139/cnb:CNBN0730%09red/cnb:CNBN1390%09red/cnb:CNBF1910%09red	#
Porphyrin and chlorophyll metabolism	KEGG PATHWAY	cnb00860	2	19	0.799626	0.999998	J9VRX8CNAG_02460|J9VPE8CNAG_05809	http://www.genome.jp/kegg-bin/show_pathway?cnb00860/cnb:CNBF3010%09red/cnb:CNBE0930%09red	#
Metabolic pathways	KEGG PATHWAY	cnb01100	92	643	0.825706	0.999998	J9VQ60CNAG_02852|J9VDZ5CNAG_00122|J9VI69CNAG_06708|J9VPE8CNAG_05809|J9VRT5CNAG_05125|J9W232CNAG_05653|J9VI18CNAG_06770|J9W002CNAG_04866|J9VW74CNAG_06645|J9VTL4CNAG_07745|J9VTS1CNAG_01027|J9VIS3CNAG_07354|J9VLE0CNAG_01078|J9VYF4CNAG_07744|J9VQ18CNAG_03128|J9VTQ7CNAG_04574|J9VZB1CNAG_01777|J9VHX4CNAG_02888|J9VR37CNAG_06923|J9VFX5CNAG_00115|J9VU59CNAG_04189|J9VQS5CNAG_03396|J9VNC5CNAG_06672|J9VHV5CN…	http://www.genome.jp/kegg-bin/show_pathway?cnb01100/cnb:CNBA3110%09red/cnb:CNBD2850%09red/cnb:CNBC0340%09red/cnb:CNBJ3350%09red/cnb:CNBA1020%09red/cnb:CNBH3400%09red/cnb:CNBK0080%09red/cnb:CNBG4050%09red/cnb:CNBC4830%09red/cnb:CNBF1330%09red/cnb:CNBI1060%09red/cnb:CNBG1290%09red/cnb:CNBH3130%09red/cnb:CNBD4300%09red/cnb:CNBA7210%09red/cnb:CNBD1400%09red/cnb:CNBK3370%09red/cnb:CNBA5760%09red/cnb:C…	#
AGE-RAGE signaling pathway in diabetic complications	KEGG PATHWAY	cnb04933	1	11	0.826598	0.999998	J9VLD9CNAG_02531	http://www.genome.jp/kegg-bin/show_pathway?cnb04933/cnb:CNBE0270%09red	#
Fatty acid metabolism	KEGG PATHWAY	cnb01212	2	21	0.839497	0.999998	J9VTZ1CNAG_05759|J9VSX5CNAG_02100	http://www.genome.jp/kegg-bin/show_pathway?cnb01212/cnb:CNBF2520%09red/cnb:CNBE4360%09red	#
beta-Alanine metabolism	KEGG PATHWAY	cnb00410	2	21	0.839497	0.999998	J9VLE0CNAG_01078|J9VQ60CNAG_02852	http://www.genome.jp/kegg-bin/show_pathway?cnb00410/cnb:CNBC2490%09red/cnb:CNBD4300%09red	#
Valine, leucine and isoleucine biosynthesis	KEGG PATHWAY	cnb00290	1	12	0.850176	0.999998	J9VNI7CNAG_06913	http://www.genome.jp/kegg-bin/show_pathway?cnb00290/cnb:CNBK3250%09red	#
Phenylalanine metabolism	KEGG PATHWAY	cnb00360	1	12	0.850176	0.999998	J9VS95CNAG_02365	http://www.genome.jp/kegg-bin/show_pathway?cnb00360/cnb:CNBE1810%09red	#
RNA degradation	KEGG PATHWAY	cnb03018	5	48	0.863979	0.999998	J9VG59CNAG_00195|J9VNH6CNAG_06903|J9VVA5CNAG_02175|J9VPG3CNAG_05219|J9VF22CNAG_00781	http://www.genome.jp/kegg-bin/show_pathway?cnb03018/cnb:CNBA1770%09red/cnb:CNBI2670%09red/cnb:CNBK3180%09red/cnb:CNBE3620%09red/cnb:CNBA7410%09red	#
Sphingolipid metabolism	KEGG PATHWAY	cnb00600	1	13	0.87055	0.999998	J9VLH3CNAG_01044	http://www.genome.jp/kegg-bin/show_pathway?cnb00600/cnb:CNBD4600%09red	#
Glycerolipid metabolism	KEGG PATHWAY	cnb00561	2	23	0.87204	0.999998	J9W153CNAG_01601|J9VLE0CNAG_01078	http://www.genome.jp/kegg-bin/show_pathway?cnb00561/cnb:CNBD4300%09red/cnb:CNBC6140%09red	#
Pyrimidine metabolism	KEGG PATHWAY	cnb00240	7	67	0.891556	0.999998	J9VI69CNAG_06708|J9VTD6CNAG_01179|J9VX92CNAG_01810|J9VN76CNAG_06611|J9VF76CNAG_00613|J9VTJ7CNAG_03521|J9VQR8CNAG_07536	http://www.genome.jp/kegg-bin/show_pathway?cnb00240/cnb:CNBC4220%09red/cnb:CNBG4050%09red/cnb:CNBD3310%09red/cnb:CNBA5760%09red/cnb:CNBF0780%09red/cnb:CNBB4760%09red/cnb:CNBK2180%09red	#
Valine, leucine and isoleucine degradation	KEGG PATHWAY	cnb00280	3	34	0.895404	0.999998	J9VLE0CNAG_01078|J9VZ29CNAG_01680|J9VQ15CNAG_02896	http://www.genome.jp/kegg-bin/show_pathway?cnb00280/cnb:CNBC5340%09red/cnb:CNBC2090%09red/cnb:CNBD4300%09red	#
Galactose metabolism	KEGG PATHWAY	cnb00052	1	15	0.903369	0.999998	J9VL57CNAG_06924	http://www.genome.jp/kegg-bin/show_pathway?cnb00052/cnb:CNBK3370%09red	#
SNARE interactions in vesicular transport	KEGG PATHWAY	cnb04130	1	15	0.903369	0.999998	J9VM82CNAG_05277	http://www.genome.jp/kegg-bin/show_pathway?cnb04130/cnb:CNBI3260%09red	#
Phosphatidylinositol signaling system	KEGG PATHWAY	cnb04070	1	15	0.903369	0.999998	J9VYF4CNAG_07744	http://www.genome.jp/kegg-bin/show_pathway?cnb04070/cnb:CNBG4170%09red	#
Glycosylphosphatidylinositol(GPI)-anchor biosynthesis	KEGG PATHWAY	cnb00563	1	17	0.927874	0.999998	J9VTQ7CNAG_04574	http://www.genome.jp/kegg-bin/show_pathway?cnb00563/cnb:CNBJ3350%09red	#
Various types of N-glycan biosynthesis	KEGG PATHWAY	cnb00513	1	17	0.927874	0.999998	J9VJT9CNAG_00744	http://www.genome.jp/kegg-bin/show_pathway?cnb00513/cnb:CNBA7030%09red	#
Phenylalanine, tyrosine and tryptophan biosynthesis	KEGG PATHWAY	cnb00400	1	17	0.927874	0.999998	J9VIE2CNAG_04951	http://www.genome.jp/kegg-bin/show_pathway?cnb00400/cnb:CNBI0210%09red	#
mRNA surveillance pathway	KEGG PATHWAY	cnb03015	4	47	0.92955	0.999998	J9VY42CNAG_04679|J9VFW9CNAG_03761|J9VTG7CNAG_03491|J9VH09CNAG_02995	http://www.genome.jp/kegg-bin/show_pathway?cnb03015/cnb:CNBB3120%09red/cnb:CNBG3780%09red/cnb:CNBC1150%09red/cnb:CNBJ2360%09red	#
Meiosis - yeast	KEGG PATHWAY	cnb04113	4	48	0.935959	0.999998	J9W2Z6CNAG_06290|T2BPX3CNAG_06290|J9W0E3CNAG_07909|J9VVI3CNAG_04824	http://www.genome.jp/kegg-bin/show_pathway?cnb04113/cnb:CNBJ0960%09red/cnb:CNBM1660%09red/cnb:CNBN0240%09red	#
Protein export	KEGG PATHWAY	cnb03060	1	18	0.937689	0.999998	J9VS21CNAG_05240	http://www.genome.jp/kegg-bin/show_pathway?cnb03060/cnb:CNBI2870%09red	#
Histidine metabolism	KEGG PATHWAY	cnb00340	1	18	0.937689	0.999998	J9VLE0CNAG_01078	http://www.genome.jp/kegg-bin/show_pathway?cnb00340/cnb:CNBD4300%09red	#
N-Glycan biosynthesis	KEGG PATHWAY	cnb00510	1	21	0.959827	0.999998	J9VTQ7CNAG_04574	http://www.genome.jp/kegg-bin/show_pathway?cnb00510/cnb:CNBJ3350%09red	#
Aminoacyl-tRNA biosynthesis	KEGG PATHWAY	cnb00970	2	33	0.960952	0.999998	J9VZX6CNAG_04896|J9VJW8CNAG_01382	http://www.genome.jp/kegg-bin/show_pathway?cnb00970/cnb:CNBD1400%09red/cnb:CNBJ0260%09red	#
Base excision repair	KEGG PATHWAY	cnb03410	1	22	0.965297	0.999998	J9VE24CNAG_00419	http://www.genome.jp/kegg-bin/show_pathway?cnb03410/cnb:CNBA3870%09red	#
Glycerophospholipid metabolism	KEGG PATHWAY	cnb00564	2	34	0.965458	0.999998	J9VGP9CNAG_03822|J9VMS4CNAG_02814	http://www.genome.jp/kegg-bin/show_pathway?cnb00564/cnb:CNBC2870%09red/cnb:CNBB2570%09red	#
Amino sugar and nucleotide sugar metabolism	KEGG PATHWAY	cnb00520	2	39	0.98144	0.999998	J9VVN4CNAG_06098|J9VF17CNAG_00546	http://www.genome.jp/kegg-bin/show_pathway?cnb00520/cnb:CNBM0910%09red/cnb:CNBA5110%09red	#
Biosynthesis of amino acids	KEGG PATHWAY	cnb01230	8	103	0.988325	0.999998	J9VIE2CNAG_04951|J9VW29CNAG_06448|J9VI18CNAG_06770|J9VJV4CNAG_01395|J9VNI7CNAG_06913|J9VHV5CNAG_00061|J9VRZ1CNAG_04523|J9VYS6CNAG_01609	http://www.genome.jp/kegg-bin/show_pathway?cnb01230/cnb:CNBB5380%09red/cnb:CNBI0210%09red/cnb:CNBA0490%09red/cnb:CNBH0320%09red/cnb:CNBK3250%09red/cnb:CNBC6060%09red/cnb:CNBN1680%09red/cnb:CNBD1280%09red	#
Endocytosis	KEGG PATHWAY	cnb04144	4	65	0.988689	0.999998	J9VE65CNAG_00470|J9VRG1CNAG_04311|J9VRH3CNAG_05050|J9VNI3CNAG_05704	http://www.genome.jp/kegg-bin/show_pathway?cnb04144/cnb:CNBH2260%09red/cnb:CNBA4330%09red/cnb:CNBF2000%09red/cnb:CNBI1140%09red	#
2-Oxocarboxylic acid metabolism	KEGG PATHWAY	cnb01210	1	31	0.990713	0.999998	J9VHV5CNAG_00061	http://www.genome.jp/kegg-bin/show_pathway?cnb01210/cnb:CNBA0490%09red	#
Cell cycle - yeast	KEGG PATHWAY	cnb04111	3	67	0.997457	0.999998	J9VRP5CNAG_05761|J9VQA9CNAG_03191|J9VVI3CNAG_04824	http://www.genome.jp/kegg-bin/show_pathway?cnb04111/cnb:CNBJ0960%09red/cnb:CNBG0970%09red/cnb:CNBF2540%09red	#
RNA transport	KEGG PATHWAY	cnb03013	4	83	0.998479	0.999998	J9VY42CNAG_04679|J9VQP6CNAG_02672|J9VQT0CNAG_01199|J9VH09CNAG_02995	http://www.genome.jp/kegg-bin/show_pathway?cnb03013/cnb:CNBD3120%09red/cnb:CNBJ2360%09red/cnb:CNBC1150%09red/cnb:CNBK1940%09red	#
Ubiquitin mediated proteolysis	KEGG PATHWAY	cnb04120	1	47	0.999112	0.999998	J9VQA9CNAG_03191	http://www.genome.jp/kegg-bin/show_pathway?cnb04120/cnb:CNBG0970%09red	#
Protein processing in endoplasmic reticulum	KEGG PATHWAY	cnb04141	1	67	0.999953	0.999998	J9VT51CNAG_04803	http://www.genome.jp/kegg-bin/show_pathway?cnb04141/cnb:CNBJ1180%09red	#
Spliceosome	KEGG PATHWAY	cnb03040	2	91	0.999981	0.999998	J9VF22CNAG_00781|J9VMG0CNAG_02426	http://www.genome.jp/kegg-bin/show_pathway?cnb03040/cnb:CNBE1250%09red/cnb:CNBA7410%09red	#
Ribosome	KEGG PATHWAY	cnb03010	2	106	0.999998	0.999998	J9VTC1CNAG_04726|J9VUT4CNAG_01812	http://www.genome.jp/kegg-bin/show_pathway?cnb03010/cnb:CNBC4200%09red/cnb:CNBJ1900%09red	#
##Databases: KEGG PATHWAY
##Statistical test method: hypergeometric test / Fisher's exact test
##FDR correction method: Benjamini and Hochberg

## Sheet: GO analysis
Table S4. KEGG and GO analyses of C. neoformans transcriptome in mouse lung tissues.
GO ID	GO term	GO Description	GeneRatio	BgRatio	pvalue	p.adjust	qvalue	geneID	Count
GO:0046873	molecular function by up regulated genes	metal ion transmembrane transporter activity	10/257	28/3340	2.31624e-05	0.00386812	0.00377912	CNAG_01232/CNAG_06326/CNAG_01318/CNAG_04867/CNAG_03135/CNAG_00010/CNAG_06242/CNAG_00895/CNAG_00979/CNAG_03398	10
GO:0005215	molecular function by up regulated genes	transporter activity	37/257	254/3340	7.10371e-05	0.0059316	0.00579513	CNAG_06259/CNAG_05119/CNAG_01232/CNAG_03140/CNAG_06338/CNAG_00097/CNAG_06326/CNAG_00077/CNAG_05459/CNAG_03838/CNAG_01059/CNAG_01318/CNAG_03426/CNAG_01055/CNAG_07917/CNAG_02254/CNAG_04867/CNAG_06292/CNAG_02479/CNAG_03135/CNAG_07799/CNAG_00010/CNAG_06102/CNAG_05632/CNAG_06932/CNAG_05640/CNAG_01742/CNAG_00864/CNAG_06034/CNAG_01681/CNAG_06758/CNAG_02777/CNAG_06242/CNAG_00895/CNAG_00979/CNAG_03398/CNA…	37
GO:0022857	molecular function by up regulated genes	transmembrane transporter activity	28/257	206/3340	0.00175423	0.0976523	0.0954056	CNAG_06259/CNAG_05119/CNAG_01232/CNAG_03140/CNAG_06338/CNAG_00097/CNAG_06326/CNAG_00077/CNAG_05459/CNAG_01059/CNAG_01318/CNAG_03426/CNAG_01055/CNAG_02254/CNAG_04867/CNAG_06292/CNAG_02479/CNAG_03135/CNAG_07799/CNAG_00010/CNAG_06932/CNAG_00864/CNAG_02777/CNAG_06242/CNAG_00895/CNAG_00979/CNAG_03398/CNAG_05075	28
GO:0004386	molecular function by up regulated genes	helicase activity	13/257	76/3340	0.00459375	0.191789	0.187377	CNAG_06206/CNAG_00764/CNAG_07609/CNAG_00809/CNAG_00166/CNAG_05360/CNAG_03205/CNAG_04580/CNAG_01140/CNAG_04147/CNAG_05627/CNAG_02502/CNAG_06741	13
GO:0004190	molecular function by up regulated genes	aspartic-type endopeptidase activity	4/257	12/3340	0.0103388	0.287763	0.281143	CNAG_06213/CNAG_05872/CNAG_07520/CNAG_05305	4
GO:0070001	molecular function by up regulated genes	aspartic-type peptidase activity	4/257	12/3340	0.0103388	0.287763	0.281143	CNAG_06213/CNAG_05872/CNAG_07520/CNAG_05305	4
GO:0015291	molecular function by up regulated genes	secondary active transmembrane transporter activity	4/257	14/3340	0.0185	0.441357	0.431203	CNAG_00077/CNAG_01318/CNAG_02777/CNAG_05075	4
GO:0004180	molecular function by up regulated genes	carboxypeptidase activity	4/257	15/3340	0.0237369	0.454462	0.444007	CNAG_05973/CNAG_04909/CNAG_01879/CNAG_00919	4
GO:0022891	molecular function by up regulated genes	substrate-specific transmembrane transporter activity	20/257	164/3340	0.024492	0.454462	0.444007	CNAG_06259/CNAG_05119/CNAG_01232/CNAG_00097/CNAG_06326/CNAG_00077/CNAG_01059/CNAG_01318/CNAG_03426/CNAG_02254/CNAG_04867/CNAG_02479/CNAG_03135/CNAG_00010/CNAG_06932/CNAG_00864/CNAG_06242/CNAG_00895/CNAG_00979/CNAG_03398	20
GO:0008173	molecular function by up regulated genes	RNA methyltransferase activity	3/257	10/3340	0.0360161	0.600496	0.586681	CNAG_04571/CNAG_03046/CNAG_03762	3
GO:0022890	molecular function by up regulated genes	inorganic cation transmembrane transporter activity	10/257	70/3340	0.0395536	0.600496	0.586681	CNAG_01232/CNAG_06326/CNAG_01318/CNAG_04867/CNAG_03135/CNAG_00010/CNAG_06242/CNAG_00895/CNAG_00979/CNAG_03398	10
GO:0051213	molecular function by up regulated genes	dioxygenase activity	5/257	26/3340	0.0448238	0.623797	0.609446	CNAG_03238/CNAG_01542/CNAG_03389/CNAG_01714/CNAG_01500	5
GO:0008168	molecular function by up regulated genes	methyltransferase activity	11/257	83/3340	0.0509669	0.654729	0.639666	CNAG_02583/CNAG_04571/CNAG_01629/CNAG_04770/CNAG_02317/CNAG_02185/CNAG_03046/CNAG_04777/CNAG_00259/CNAG_03724/CNAG_03762	11
GO:0022892	molecular function by up regulated genes	substrate-specific transporter activity	20/257	185/3340	0.0723	0.757514	0.740086	CNAG_06259/CNAG_05119/CNAG_01232/CNAG_00097/CNAG_06326/CNAG_00077/CNAG_01059/CNAG_01318/CNAG_03426/CNAG_02254/CNAG_04867/CNAG_02479/CNAG_03135/CNAG_00010/CNAG_06932/CNAG_00864/CNAG_06242/CNAG_00895/CNAG_00979/CNAG_03398	20
GO:0016741	molecular function by up regulated genes	transferase activity, transferring one-carbon groups	11/257	89/3340	0.0769595	0.757514	0.740086	CNAG_02583/CNAG_04571/CNAG_01629/CNAG_04770/CNAG_02317/CNAG_02185/CNAG_03046/CNAG_04777/CNAG_00259/CNAG_03724/CNAG_03762	11
GO:0003899	molecular function by up regulated genes	DNA-directed 5'-3' RNA polymerase activity	5/257	31/3340	0.0849383	0.757514	0.740086	CNAG_01179/CNAG_07536/CNAG_06611/CNAG_03521/CNAG_01810	5
GO:0008324	molecular function by up regulated genes	cation transmembrane transporter activity	10/257	81/3340	0.0897188	0.757514	0.740086	CNAG_01232/CNAG_06326/CNAG_01318/CNAG_04867/CNAG_03135/CNAG_00010/CNAG_06242/CNAG_00895/CNAG_00979/CNAG_03398	10
GO:0017111	molecular function by up regulated genes	nucleoside-triphosphatase activity	22/257	214/3340	0.0944339	0.757514	0.740086	CNAG_01232/CNAG_06206/CNAG_00764/CNAG_07609/CNAG_00809/CNAG_06338/CNAG_03876/CNAG_00166/CNAG_05360/CNAG_00104/CNAG_07909/CNAG_03205/CNAG_04580/CNAG_01140/CNAG_04147/CNAG_05627/CNAG_07799/CNAG_02502/CNAG_05597/CNAG_06741/CNAG_07855/CNAG_04655	22
GO:0034062	molecular function by up regulated genes	5'-3' RNA polymerase activity	5/257	32/3340	0.0946659	0.757514	0.740086	CNAG_01179/CNAG_07536/CNAG_06611/CNAG_03521/CNAG_01810	5
GO:0097747	molecular function by up regulated genes	RNA polymerase activity	5/257	32/3340	0.0946659	0.757514	0.740086	CNAG_01179/CNAG_07536/CNAG_06611/CNAG_03521/CNAG_01810	5
GO:0008080	molecular function by up regulated genes	N-acetyltransferase activity	4/257	23/3340	0.0952562	0.757514	0.740086	CNAG_01247/CNAG_05695/CNAG_07572/CNAG_04355	4
GO:0043565	molecular function by up regulated genes	sequence-specific DNA binding	8/257	62/3340	0.100015	0.759208	0.741741	CNAG_05861/CNAG_00871/CNAG_07940/CNAG_01883/CNAG_04036/CNAG_06762/CNAG_01841/CNAG_01551	8
GO:0016410	molecular function by up regulated genes	N-acyltransferase activity	4/257	25/3340	0.120926	0.818752	0.799915	CNAG_01247/CNAG_05695/CNAG_07572/CNAG_04355	4
GO:0022804	molecular function by up regulated genes	active transmembrane transporter activity	7/257	55/3340	0.126108	0.818752	0.799915	CNAG_01232/CNAG_06338/CNAG_00077/CNAG_01318/CNAG_07799/CNAG_02777/CNAG_05075	7
GO:0016462	molecular function by up regulated genes	pyrophosphatase activity	22/257	222/3340	0.126348	0.818752	0.799915	CNAG_01232/CNAG_06206/CNAG_00764/CNAG_07609/CNAG_00809/CNAG_06338/CNAG_03876/CNAG_00166/CNAG_05360/CNAG_00104/CNAG_07909/CNAG_03205/CNAG_04580/CNAG_01140/CNAG_04147/CNAG_05627/CNAG_07799/CNAG_02502/CNAG_05597/CNAG_06741/CNAG_07855/CNAG_04655	22
GO:0016407	molecular function by up regulated genes	acetyltransferase activity	4/257	26/3340	0.134763	0.818752	0.799915	CNAG_01247/CNAG_05695/CNAG_07572/CNAG_04355	4
GO:0015075	molecular function by up regulated genes	ion transmembrane transporter activity	12/257	110/3340	0.135919	0.818752	0.799915	CNAG_05119/CNAG_01232/CNAG_06326/CNAG_00077/CNAG_01318/CNAG_04867/CNAG_03135/CNAG_00010/CNAG_06242/CNAG_00895/CNAG_00979/CNAG_03398	12
GO:0016818	molecular function by up regulated genes	hydrolase activity, acting on acid anhydrides, in phosphorus-containing anhydrides	22/257	225/3340	0.139827	0.818752	0.799915	CNAG_01232/CNAG_06206/CNAG_00764/CNAG_07609/CNAG_00809/CNAG_06338/CNAG_03876/CNAG_00166/CNAG_05360/CNAG_00104/CNAG_07909/CNAG_03205/CNAG_04580/CNAG_01140/CNAG_04147/CNAG_05627/CNAG_07799/CNAG_02502/CNAG_05597/CNAG_06741/CNAG_07855/CNAG_04655	22
GO:0008236	molecular function by up regulated genes	serine-type peptidase activity	4/257	27/3340	0.14921	0.818752	0.799915	CNAG_05973/CNAG_04909/CNAG_01879/CNAG_00919	4
GO:0017171	molecular function by up regulated genes	serine hydrolase activity	4/257	27/3340	0.14921	0.818752	0.799915	CNAG_05973/CNAG_04909/CNAG_01879/CNAG_00919	4
GO:0016817	molecular function by up regulated genes	hydrolase activity, acting on acid anhydrides	22/257	228/3340	0.154121	0.818752	0.799915	CNAG_01232/CNAG_06206/CNAG_00764/CNAG_07609/CNAG_00809/CNAG_06338/CNAG_03876/CNAG_00166/CNAG_05360/CNAG_00104/CNAG_07909/CNAG_03205/CNAG_04580/CNAG_01140/CNAG_04147/CNAG_05627/CNAG_07799/CNAG_02502/CNAG_05597/CNAG_06741/CNAG_07855/CNAG_04655	22
GO:0004553	molecular function by up regulated genes	hydrolase activity, hydrolyzing O-glycosyl compounds	7/257	59/3340	0.164512	0.818752	0.799915	CNAG_06336/CNAG_05652/CNAG_05803/CNAG_05458/CNAG_00897/CNAG_05264/CNAG_04874	7
GO:0016746	molecular function by up regulated genes	transferase activity, transferring acyl groups	8/257	70/3340	0.16663	0.818752	0.799915	CNAG_02270/CNAG_05653/CNAG_06862/CNAG_01247/CNAG_05695/CNAG_03822/CNAG_07572/CNAG_04355	8
GO:0016776	molecular function by up regulated genes	phosphotransferase activity, phosphate group as acceptor	2/257	10/3340	0.176497	0.818752	0.799915	CNAG_01364/CNAG_05597	2
GO:0019205	molecular function by up regulated genes	nucleobase-containing compound kinase activity	2/257	10/3340	0.176497	0.818752	0.799915	CNAG_01364/CNAG_05597	2
GO:0038023	molecular function by up regulated genes	signaling receptor activity	2/257	10/3340	0.176497	0.818752	0.799915	CNAG_06808/CNAG_05586	2
GO:0016747	molecular function by up regulated genes	transferase activity, transferring acyl groups other than amino-acyl groups	6/257	50/3340	0.182944	0.825718	0.806721	CNAG_02270/CNAG_06862/CNAG_01247/CNAG_05695/CNAG_07572/CNAG_04355	6
GO:0004872	molecular function by up regulated genes	receptor activity	2/257	11/3340	0.205325	0.879212	0.858984	CNAG_06808/CNAG_05586	2
GO:0060089	molecular function by up regulated genes	molecular transducer activity	2/257	11/3340	0.205325	0.879212	0.858984	CNAG_06808/CNAG_05586	2
GO:0004871	molecular function by up regulated genes	signal transducer activity	3/257	21/3340	0.21612	0.902299	0.88154	CNAG_02531/CNAG_06808/CNAG_05586	3
GO:0016798	molecular function by up regulated genes	hydrolase activity, acting on glycosyl bonds	7/257	65/3340	0.230399	0.911145	0.890182	CNAG_06336/CNAG_05652/CNAG_05803/CNAG_05458/CNAG_00897/CNAG_05264/CNAG_04874	7
GO:0005507	molecular function by up regulated genes	copper ion binding	2/257	12/3340	0.234606	0.911145	0.890182	CNAG_07865/CNAG_06241	2
GO:0043021	molecular function by up regulated genes	ribonucleoprotein complex binding	2/257	12/3340	0.234606	0.911145	0.890182	CNAG_03975/CNAG_03624	2
GO:0051287	molecular function by up regulated genes	NAD binding	5/257	45/3340	0.262461	0.958804	0.936745	CNAG_04085/CNAG_00126/CNAG_00029/CNAG_01794/CNAG_04866	5
GO:0008238	molecular function by up regulated genes	exopeptidase activity	4/257	34/3340	0.263434	0.958804	0.936745	CNAG_05973/CNAG_04909/CNAG_01879/CNAG_00919	4
GO:0008081	molecular function by up regulated genes	phosphoric diester hydrolase activity	2/257	13/3340	0.264102	0.958804	0.936745	CNAG_00933/CNAG_05003	2
GO:0016779	molecular function by up regulated genes	nucleotidyltransferase activity	7/257	69/3340	0.278581	0.960037	0.93795	CNAG_01179/CNAG_07536/CNAG_06611/CNAG_04215/CNAG_00419/CNAG_03521/CNAG_01810	7
GO:0070011	molecular function by up regulated genes	peptidase activity, acting on L-amino acid peptides	11/257	118/3340	0.296691	0.960037	0.93795	CNAG_05973/CNAG_06213/CNAG_05872/CNAG_04909/CNAG_02694/CNAG_01879/CNAG_00455/CNAG_07520/CNAG_00919/CNAG_04735/CNAG_05305	11
GO:0005506	molecular function by up regulated genes	iron ion binding	3/257	25/3340	0.301512	0.960037	0.93795	CNAG_03238/CNAG_04039/CNAG_06623	3
GO:0008757	molecular function by up regulated genes	S-adenosylmethionine-dependent methyltransferase activity	3/257	26/3340	0.323262	0.960037	0.93795	CNAG_04571/CNAG_03724/CNAG_03762	3
GO:0032549	molecular function by up regulated genes	ribonucleoside binding	8/257	85/3340	0.32926	0.960037	0.93795	CNAG_06611/CNAG_03876/CNAG_07537/CNAG_02720/CNAG_01608/CNAG_04655/CNAG_07413/CNAG_06468	8
GO:0001882	molecular function by up regulated genes	nucleoside binding	8/257	86/3340	0.341159	0.960037	0.93795	CNAG_06611/CNAG_03876/CNAG_07537/CNAG_02720/CNAG_01608/CNAG_04655/CNAG_07413/CNAG_06468	8
GO:0010181	molecular function by up regulated genes	FMN binding	3/257	27/3340	0.345019	0.960037	0.93795	CNAG_01331/CNAG_01229/CNAG_02758	3
GO:0001071	molecular function by up regulated genes	nucleic acid binding transcription factor activity	15/257	173/3340	0.351794	0.960037	0.93795	CNAG_05861/CNAG_00505/CNAG_03115/CNAG_04457/CNAG_00871/CNAG_07940/CNAG_01883/CNAG_01487/CNAG_04036/CNAG_06762/CNAG_06252/CNAG_00332/CNAG_03894/CNAG_01841/CNAG_01551	15
GO:0003700	molecular function by up regulated genes	transcription factor activity, sequence-specific DNA binding	15/257	173/3340	0.351794	0.960037	0.93795	CNAG_05861/CNAG_00505/CNAG_03115/CNAG_04457/CNAG_00871/CNAG_07940/CNAG_01883/CNAG_01487/CNAG_04036/CNAG_06762/CNAG_06252/CNAG_00332/CNAG_03894/CNAG_01841/CNAG_01551	15
GO:0004521	molecular function by up regulated genes	endoribonuclease activity	2/257	16/3340	0.351967	0.960037	0.93795	CNAG_00449/CNAG_03481	2
GO:0046914	molecular function by up regulated genes	transition metal ion binding	31/257	375/3340	0.360129	0.960037	0.93795	CNAG_00613/CNAG_00505/CNAG_01913/CNAG_03889/CNAG_07865/CNAG_06742/CNAG_03115/CNAG_03238/CNAG_04457/CNAG_03807/CNAG_06708/CNAG_06816/CNAG_01883/CNAG_06693/CNAG_07998/CNAG_04677/CNAG_04039/CNAG_01487/CNAG_06762/CNAG_03521/CNAG_06252/CNAG_00332/CNAG_03055/CNAG_03964/CNAG_01810/CNAG_03894/CNAG_01841/CNAG_01551/CNAG_06623/CNAG_06241/CNAG_04735	31
GO:0016757	molecular function by up regulated genes	transferase activity, transferring glycosyl groups	7/257	76/3340	0.367751	0.960037	0.93795	CNAG_00546/CNAG_00744/CNAG_05430/CNAG_04574/CNAG_00702/CNAG_04449/CNAG_00165	7
GO:0016209	molecular function by up regulated genes	antioxidant activity	2/257	17/3340	0.38055	0.960037	0.93795	CNAG_00654/CNAG_06917	2
GO:0001883	molecular function by up regulated genes	purine nucleoside binding	7/257	82/3340	0.445704	0.960037	0.93795	CNAG_03876/CNAG_07537/CNAG_02720/CNAG_01608/CNAG_04655/CNAG_07413/CNAG_06468	7
GO:0005525	molecular function by up regulated genes	GTP binding	7/257	82/3340	0.445704	0.960037	0.93795	CNAG_03876/CNAG_07537/CNAG_02720/CNAG_01608/CNAG_04655/CNAG_07413/CNAG_06468	7
GO:0019001	molecular function by up regulated genes	guanyl nucleotide binding	7/257	82/3340	0.445704	0.960037	0.93795	CNAG_03876/CNAG_07537/CNAG_02720/CNAG_01608/CNAG_04655/CNAG_07413/CNAG_06468	7
GO:0032550	molecular function by up regulated genes	purine ribonucleoside binding	7/257	82/3340	0.445704	0.960037	0.93795	CNAG_03876/CNAG_07537/CNAG_02720/CNAG_01608/CNAG_04655/CNAG_07413/CNAG_06468	7
GO:0032561	molecular function by up regulated genes	guanyl ribonucleotide binding	7/257	82/3340	0.445704	0.960037	0.93795	CNAG_03876/CNAG_07537/CNAG_02720/CNAG_01608/CNAG_04655/CNAG_07413/CNAG_06468	7
GO:0016887	molecular function by up regulated genes	ATPase activity	8/257	95/3340	0.449666	0.960037	0.93795	CNAG_01232/CNAG_06338/CNAG_00104/CNAG_07909/CNAG_07799/CNAG_05597/CNAG_06741/CNAG_07855	8
GO:0008233	molecular function by up regulated genes	peptidase activity	11/257	134/3340	0.457908	0.960037	0.93795	CNAG_05973/CNAG_06213/CNAG_05872/CNAG_04909/CNAG_02694/CNAG_01879/CNAG_00455/CNAG_07520/CNAG_00919/CNAG_04735/CNAG_05305	11
GO:0008270	molecular function by up regulated genes	zinc ion binding	26/257	330/3340	0.480792	0.960037	0.93795	CNAG_00613/CNAG_00505/CNAG_01913/CNAG_03889/CNAG_06742/CNAG_03115/CNAG_04457/CNAG_03807/CNAG_06708/CNAG_06816/CNAG_01883/CNAG_06693/CNAG_07998/CNAG_04677/CNAG_01487/CNAG_06762/CNAG_03521/CNAG_06252/CNAG_00332/CNAG_03055/CNAG_03964/CNAG_01810/CNAG_03894/CNAG_01841/CNAG_01551/CNAG_04735	26
GO:0016667	molecular function by up regulated genes	oxidoreductase activity, acting on a sulfur group of donors	2/257	21/3340	0.488665	0.960037	0.93795	CNAG_00654/CNAG_03848	2
GO:0004175	molecular function by up regulated genes	endopeptidase activity	5/257	61/3340	0.51047	0.960037	0.93795	CNAG_06213/CNAG_05872/CNAG_07520/CNAG_04735/CNAG_05305	5
GO:0019899	molecular function by up regulated genes	enzyme binding	2/257	22/3340	0.513825	0.960037	0.93795	CNAG_02658/CNAG_05884	2
GO:0044877	molecular function by up regulated genes	macromolecular complex binding	2/257	22/3340	0.513825	0.960037	0.93795	CNAG_03975/CNAG_03624	2
GO:0004540	molecular function by up regulated genes	ribonuclease activity	2/257	23/3340	0.538158	0.960037	0.93795	CNAG_00449/CNAG_03481	2
GO:0016616	molecular function by up regulated genes	oxidoreductase activity, acting on the CH-OH group of donors, NAD or NADP as acceptor	4/257	50/3340	0.54426	0.960037	0.93795	CNAG_04085/CNAG_00126/CNAG_00029/CNAG_01794	4
GO:0016645	molecular function by up regulated genes	oxidoreductase activity, acting on the CH-NH group of donors	1/257	10/3340	0.55148	0.960037	0.93795	CNAG_06645	1
GO:0016684	molecular function by up regulated genes	oxidoreductase activity, acting on peroxide as acceptor	1/257	10/3340	0.55148	0.960037	0.93795	CNAG_06917	1
GO:0016814	molecular function by up regulated genes	hydrolase activity, acting on carbon-nitrogen (but not peptide) bonds, in cyclic amidines	1/257	10/3340	0.55148	0.960037	0.93795	CNAG_06009	1
GO:0016861	molecular function by up regulated genes	intramolecular oxidoreductase activity, interconverting aldoses and ketoses	1/257	10/3340	0.55148	0.960037	0.93795	CNAG_06098	1
GO:0016891	molecular function by up regulated genes	endoribonuclease activity, producing 5'-phosphomonoesters	1/257	10/3340	0.55148	0.960037	0.93795	CNAG_03481	1
GO:0051537	molecular function by up regulated genes	2 iron, 2 sulfur cluster binding	1/257	10/3340	0.55148	0.960037	0.93795	CNAG_04039	1
GO:0042626	molecular function by up regulated genes	ATPase activity, coupled to transmembrane movement of substances	3/257	38/3340	0.569232	0.960037	0.93795	CNAG_01232/CNAG_06338/CNAG_07799	3
GO:0003723	molecular function by up regulated genes	RNA binding	16/257	213/3340	0.581156	0.960037	0.93795	CNAG_04571/CNAG_02378/CNAG_00764/CNAG_00603/CNAG_02185/CNAG_06228/CNAG_00104/CNAG_03481/CNAG_03724/CNAG_05627/CNAG_03675/CNAG_03491/CNAG_07864/CNAG_05597/CNAG_06741/CNAG_04072	16
GO:0008509	molecular function by up regulated genes	anion transmembrane transporter activity	2/257	25/3340	0.584262	0.960037	0.93795	CNAG_05119/CNAG_00077	2
GO:0020037	molecular function by up regulated genes	heme binding	2/257	25/3340	0.584262	0.960037	0.93795	CNAG_06383/CNAG_01229	2
GO:0046906	molecular function by up regulated genes	tetrapyrrole binding	2/257	25/3340	0.584262	0.960037	0.93795	CNAG_06383/CNAG_01229	2
GO:0008170	molecular function by up regulated genes	N-methyltransferase activity	1/257	11/3340	0.586095	0.960037	0.93795	CNAG_04571	1
GO:0015036	molecular function by up regulated genes	disulfide oxidoreductase activity	1/257	11/3340	0.586095	0.960037	0.93795	CNAG_03848	1
GO:0016763	molecular function by up regulated genes	transferase activity, transferring pentosyl groups	1/257	11/3340	0.586095	0.960037	0.93795	CNAG_00165	1
GO:0017016	molecular function by up regulated genes	Ras GTPase binding	1/257	11/3340	0.586095	0.960037	0.93795	CNAG_05884	1
GO:0031267	molecular function by up regulated genes	small GTPase binding	1/257	11/3340	0.586095	0.960037	0.93795	CNAG_05884	1
GO:0051020	molecular function by up regulated genes	GTPase binding	1/257	11/3340	0.586095	0.960037	0.93795	CNAG_05884	1
GO:0071949	molecular function by up regulated genes	FAD binding	1/257	11/3340	0.586095	0.960037	0.93795	CNAG_06785	1
GO:0015399	molecular function by up regulated genes	primary active transmembrane transporter activity	3/257	39/3340	0.587272	0.960037	0.93795	CNAG_01232/CNAG_06338/CNAG_07799	3
GO:0015405	molecular function by up regulated genes	P-P-bond-hydrolysis-driven transmembrane transporter activity	3/257	39/3340	0.587272	0.960037	0.93795	CNAG_01232/CNAG_06338/CNAG_07799	3
GO:0016820	molecular function by up regulated genes	hydrolase activity, acting on acid anhydrides, catalyzing transmembrane movement of substances	3/257	40/3340	0.604824	0.960037	0.93795	CNAG_01232/CNAG_06338/CNAG_07799	3
GO:0000049	molecular function by up regulated genes	tRNA binding	1/257	12/3340	0.618049	0.960037	0.93795	CNAG_03481	1
GO:0042578	molecular function by up regulated genes	phosphoric ester hydrolase activity	5/257	69/3340	0.62281	0.960037	0.93795	CNAG_00933/CNAG_02681/CNAG_06967/CNAG_06115/CNAG_05003	5
GO:0005085	molecular function by up regulated genes	guanyl-nucleotide exchange factor activity	2/257	27/3340	0.626891	0.960037	0.93795	CNAG_00495/CNAG_02381	2
GO:0043492	molecular function by up regulated genes	ATPase activity, coupled to movement of substances	3/257	42/3340	0.638425	0.960037	0.93795	CNAG_01232/CNAG_06338/CNAG_07799	3
GO:0016860	molecular function by up regulated genes	intramolecular oxidoreductase activity	1/257	13/3340	0.647545	0.960037	0.93795	CNAG_06098	1
GO:0016614	molecular function by up regulated genes	oxidoreductase activity, acting on CH-OH group of donors	4/257	58/3340	0.66357	0.960037	0.93795	CNAG_04085/CNAG_00126/CNAG_00029/CNAG_01794	4
GO:0003887	molecular function by up regulated genes	DNA-directed DNA polymerase activity	1/257	14/3340	0.674771	0.960037	0.93795	CNAG_00419	1
GO:0019829	molecular function by up regulated genes	cation-transporting ATPase activity	1/257	14/3340	0.674771	0.960037	0.93795	CNAG_01232	1
GO:0022853	molecular function by up regulated genes	active ion transmembrane transporter activity	1/257	14/3340	0.674771	0.960037	0.93795	CNAG_01232	1
GO:0042625	molecular function by up regulated genes	ATPase coupled ion transmembrane transporter activity	1/257	14/3340	0.674771	0.960037	0.93795	CNAG_01232	1
GO:0042623	molecular function by up regulated genes	ATPase activity, coupled	5/257	74/3340	0.684683	0.960037	0.93795	CNAG_01232/CNAG_06338/CNAG_07909/CNAG_07799/CNAG_06741	5
GO:0016810	molecular function by up regulated genes	hydrolase activity, acting on carbon-nitrogen (but not peptide) bonds	3/257	45/3340	0.684996	0.960037	0.93795	CNAG_05799/CNAG_04520/CNAG_06009	3
GO:0015171	molecular function by up regulated genes	amino acid transmembrane transporter activity	1/257	15/3340	0.699901	0.960037	0.93795	CNAG_05119	1
GO:0034061	molecular function by up regulated genes	DNA polymerase activity	1/257	15/3340	0.699901	0.960037	0.93795	CNAG_00419	1
GO:0005509	molecular function by up regulated genes	calcium ion binding	2/257	32/3340	0.718535	0.960037	0.93795	CNAG_00888/CNAG_05264	2
GO:0005342	molecular function by up regulated genes	organic acid transmembrane transporter activity	1/257	16/3340	0.723097	0.960037	0.93795	CNAG_05119	1
GO:0008514	molecular function by up regulated genes	organic anion transmembrane transporter activity	1/257	16/3340	0.723097	0.960037	0.93795	CNAG_05119	1
GO:0016893	molecular function by up regulated genes	endonuclease activity, active with either ribo- or deoxyribonucleic acids and producing 5'-phosphomonoesters	1/257	16/3340	0.723097	0.960037	0.93795	CNAG_03481	1
GO:0046943	molecular function by up regulated genes	carboxylic acid transmembrane transporter activity	1/257	16/3340	0.723097	0.960037	0.93795	CNAG_05119	1
GO:0005524	molecular function by up regulated genes	ATP binding	32/257	452/3340	0.72916	0.960037	0.93795	CNAG_05274/CNAG_01232/CNAG_06206/CNAG_00764/CNAG_01084/CNAG_07609/CNAG_01612/CNAG_00809/CNAG_06338/CNAG_02531/CNAG_00166/CNAG_05360/CNAG_06845/CNAG_01687/CNAG_00104/CNAG_07909/CNAG_04997/CNAG_01680/CNAG_04215/CNAG_03205/CNAG_04580/CNAG_00531/CNAG_01140/CNAG_04147/CNAG_05627/CNAG_02389/CNAG_07799/CNAG_02502/CNAG_05597/CNAG_06741/CNAG_07855/CNAG_03137	32
GO:0032559	molecular function by up regulated genes	adenyl ribonucleotide binding	32/257	453/3340	0.733903	0.960037	0.93795	CNAG_05274/CNAG_01232/CNAG_06206/CNAG_00764/CNAG_01084/CNAG_07609/CNAG_01612/CNAG_00809/CNAG_06338/CNAG_02531/CNAG_00166/CNAG_05360/CNAG_06845/CNAG_01687/CNAG_00104/CNAG_07909/CNAG_04997/CNAG_01680/CNAG_04215/CNAG_03205/CNAG_04580/CNAG_00531/CNAG_01140/CNAG_04147/CNAG_05627/CNAG_02389/CNAG_07799/CNAG_02502/CNAG_05597/CNAG_06741/CNAG_07855/CNAG_03137	32
GO:0051536	molecular function by up regulated genes	iron-sulfur cluster binding	2/257	33/3340	0.734421	0.960037	0.93795	CNAG_07572/CNAG_04039	2
GO:0051540	molecular function by up regulated genes	metal cluster binding	2/257	33/3340	0.734421	0.960037	0.93795	CNAG_07572/CNAG_04039	2
GO:0030554	molecular function by up regulated genes	adenyl nucleotide binding	32/257	454/3340	0.738599	0.960037	0.93795	CNAG_05274/CNAG_01232/CNAG_06206/CNAG_00764/CNAG_01084/CNAG_07609/CNAG_01612/CNAG_00809/CNAG_06338/CNAG_02531/CNAG_00166/CNAG_05360/CNAG_06845/CNAG_01687/CNAG_00104/CNAG_07909/CNAG_04997/CNAG_01680/CNAG_04215/CNAG_03205/CNAG_04580/CNAG_00531/CNAG_01140/CNAG_04147/CNAG_05627/CNAG_02389/CNAG_07799/CNAG_02502/CNAG_05597/CNAG_06741/CNAG_07855/CNAG_03137	32
GO:0004222	molecular function by up regulated genes	metalloendopeptidase activity	1/257	17/3340	0.744506	0.960037	0.93795	CNAG_04735	1
GO:0005088	molecular function by up regulated genes	Ras guanyl-nucleotide exchange factor activity	1/257	17/3340	0.744506	0.960037	0.93795	CNAG_02381	1
GO:0005089	molecular function by up regulated genes	Rho guanyl-nucleotide exchange factor activity	1/257	17/3340	0.744506	0.960037	0.93795	CNAG_02381	1
GO:0004672	molecular function by up regulated genes	protein kinase activity	7/257	109/3340	0.746441	0.960037	0.93795	CNAG_05274/CNAG_01612/CNAG_02531/CNAG_06845/CNAG_01687/CNAG_02389/CNAG_03137	7
GO:0008237	molecular function by up regulated genes	metallopeptidase activity	2/257	34/3340	0.749541	0.960037	0.93795	CNAG_02694/CNAG_04735	2
GO:0003746	molecular function by up regulated genes	translation elongation factor activity	1/257	18/3340	0.764266	0.960037	0.93795	CNAG_00104	1
GO:0008094	molecular function by up regulated genes	DNA-dependent ATPase activity	1/257	18/3340	0.764266	0.960037	0.93795	CNAG_07909	1
GO:0016765	molecular function by up regulated genes	transferase activity, transferring alkyl or aryl (other than methyl) groups	1/257	18/3340	0.764266	0.960037	0.93795	CNAG_04951	1
GO:0019783	molecular function by up regulated genes	ubiquitin-like protein-specific protease activity	1/257	18/3340	0.764266	0.960037	0.93795	CNAG_00455	1
GO:0036459	molecular function by up regulated genes	thiol-dependent ubiquitinyl hydrolase activity	1/257	18/3340	0.764266	0.960037	0.93795	CNAG_00455	1
GO:0101005	molecular function by up regulated genes	ubiquitinyl hydrolase activity	1/257	18/3340	0.764266	0.960037	0.93795	CNAG_00455	1
GO:0016791	molecular function by up regulated genes	phosphatase activity	3/257	52/3340	0.775973	0.960037	0.93795	CNAG_02681/CNAG_06967/CNAG_06115	3
GO:0016772	molecular function by up regulated genes	transferase activity, transferring phosphorus-containing groups	19/257	286/3340	0.789467	0.960037	0.93795	CNAG_01179/CNAG_05274/CNAG_07536/CNAG_06611/CNAG_01612/CNAG_02531/CNAG_06845/CNAG_01687/CNAG_04215/CNAG_05761/CNAG_01364/CNAG_02389/CNAG_00419/CNAG_02802/CNAG_03521/CNAG_05597/CNAG_03137/CNAG_01810/CNAG_06033	19
GO:0098772	molecular function by up regulated genes	molecular function regulator	4/257	70/3340	0.799332	0.960037	0.93795	CNAG_00495/CNAG_05761/CNAG_04574/CNAG_02381	4
GO:0003755	molecular function by up regulated genes	peptidyl-prolyl cis-trans isomerase activity	1/257	20/3340	0.799334	0.960037	0.93795	CNAG_02484	1
GO:0016859	molecular function by up regulated genes	cis-trans isomerase activity	1/257	20/3340	0.799334	0.960037	0.93795	CNAG_02484	1
GO:0016491	molecular function by up regulated genes	oxidoreductase activity	29/257	428/3340	0.803987	0.960037	0.93795	CNAG_02478/CNAG_06524/CNAG_07865/CNAG_06645/CNAG_03238/CNAG_01331/CNAG_01542/CNAG_03389/CNAG_01714/CNAG_04085/CNAG_00126/CNAG_01229/CNAG_01500/CNAG_04677/CNAG_00029/CNAG_07770/CNAG_02758/CNAG_03340/CNAG_01794/CNAG_02489/CNAG_06815/CNAG_08028/CNAG_07911/CNAG_00654/CNAG_06785/CNAG_06623/CNAG_06241/CNAG_06917/CNAG_03848	29
GO:0016301	molecular function by up regulated genes	kinase activity	13/257	204/3340	0.804807	0.960037	0.93795	CNAG_05274/CNAG_01612/CNAG_02531/CNAG_06845/CNAG_01687/CNAG_04215/CNAG_05761/CNAG_01364/CNAG_02389/CNAG_02802/CNAG_05597/CNAG_03137/CNAG_06033	13
GO:0004497	molecular function by up regulated genes	monooxygenase activity	1/257	21/3340	0.814868	0.960037	0.93795	CNAG_06785	1
GO:0048037	molecular function by up regulated genes	cofactor binding	11/257	178/3340	0.821129	0.960037	0.93795	CNAG_01331/CNAG_06913/CNAG_04085/CNAG_00126/CNAG_01229/CNAG_01865/CNAG_00029/CNAG_02758/CNAG_01794/CNAG_04866/CNAG_06785	11
GO:0016773	molecular function by up regulated genes	phosphotransferase activity, alcohol group as acceptor	9/257	150/3340	0.829359	0.960037	0.93795	CNAG_05274/CNAG_01612/CNAG_02531/CNAG_06845/CNAG_01687/CNAG_04215/CNAG_02389/CNAG_02802/CNAG_03137	9
GO:0016788	molecular function by up regulated genes	hydrolase activity, acting on ester bonds	10/257	166/3340	0.835949	0.960037	0.93795	CNAG_00933/CNAG_02681/CNAG_00488/CNAG_00449/CNAG_03481/CNAG_06967/CNAG_05673/CNAG_06115/CNAG_05003/CNAG_03222	10
GO:0004519	molecular function by up regulated genes	endonuclease activity	2/257	41/3340	0.835962	0.960037	0.93795	CNAG_00449/CNAG_03481	2
GO:0030170	molecular function by up regulated genes	pyridoxal phosphate binding	2/257	41/3340	0.835962	0.960037	0.93795	CNAG_06913/CNAG_01865	2
GO:0070279	molecular function by up regulated genes	vitamin B6 binding	2/257	41/3340	0.835962	0.960037	0.93795	CNAG_06913/CNAG_01865	2
GO:0000981	molecular function by up regulated genes	RNA polymerase II transcription factor activity, sequence-specific DNA binding	7/257	122/3340	0.841863	0.960037	0.93795	CNAG_00505/CNAG_03115/CNAG_04457/CNAG_01487/CNAG_06252/CNAG_00332/CNAG_03894	7
GO:0008026	molecular function by up regulated genes	ATP-dependent helicase activity	1/257	23/3340	0.842432	0.960037	0.93795	CNAG_06741	1
GO:0070035	molecular function by up regulated genes	purine NTP-dependent helicase activity	1/257	23/3340	0.842432	0.960037	0.93795	CNAG_06741	1
GO:0008234	molecular function by up regulated genes	cysteine-type peptidase activity	1/257	24/3340	0.854641	0.960037	0.93795	CNAG_00455	1
GO:0030234	molecular function by up regulated genes	enzyme regulator activity	2/257	43/3340	0.855175	0.960037	0.93795	CNAG_05761/CNAG_04574	2
GO:0050662	molecular function by up regulated genes	coenzyme binding	6/257	109/3340	0.85656	0.960037	0.93795	CNAG_04085/CNAG_00126/CNAG_00029/CNAG_01794/CNAG_04866/CNAG_06785	6
GO:0046983	molecular function by up regulated genes	protein dimerization activity	2/257	45/3340	0.872319	0.971181	0.948838	CNAG_01179/CNAG_02516	2
GO:0004674	molecular function by up regulated genes	protein serine/threonine kinase activity	2/257	49/3340	0.901146	0.988427	0.965687	CNAG_02531/CNAG_01687	2
GO:0015077	molecular function by up regulated genes	monovalent inorganic cation transmembrane transporter activity	2/257	49/3340	0.901146	0.988427	0.965687	CNAG_01318/CNAG_04867	2
GO:0016879	molecular function by up regulated genes	ligase activity, forming carbon-nitrogen bonds	1/257	30/3340	0.91045	0.988427	0.965687	CNAG_01680	1
GO:0019842	molecular function by up regulated genes	vitamin binding	2/257	51/3340	0.913175	0.988427	0.965687	CNAG_06913/CNAG_01865	2
GO:0009055	molecular function by up regulated genes	electron carrier activity	1/257	31/3340	0.917403	0.988427	0.965687	CNAG_03848	1
GO:0003924	molecular function by up regulated genes	GTPase activity	2/257	54/3340	0.928678	0.994161	0.971289	CNAG_03876/CNAG_04655	2
GO:0016758	molecular function by up regulated genes	transferase activity, transferring hexosyl groups	1/257	34/3340	0.935197	0.994763	0.971877	CNAG_00546	1
GO:0003677	molecular function by up regulated genes	DNA binding	16/257	301/3340	0.964181	0.997897	0.974938	CNAG_05861/CNAG_01913/CNAG_06611/CNAG_00627/CNAG_01858/CNAG_07909/CNAG_00871/CNAG_07940/CNAG_01883/CNAG_00419/CNAG_04036/CNAG_06762/CNAG_07725/CNAG_01841/CNAG_05757/CNAG_01551	16
GO:0050660	molecular function by up regulated genes	flavin adenine dinucleotide binding	1/257	42/3340	0.966106	0.997897	0.974938	CNAG_06785	1
GO:0015078	molecular function by up regulated genes	hydrogen ion transmembrane transporter activity	1/257	45/3340	0.97343	0.997897	0.974938	CNAG_01318	1
GO:0004518	molecular function by up regulated genes	nuclease activity	2/257	69/3340	0.974144	0.997897	0.974938	CNAG_00449/CNAG_03481	2
GO:0016829	molecular function by up regulated genes	lyase activity	3/257	90/3340	0.974459	0.997897	0.974938	CNAG_02781/CNAG_06913/CNAG_00164	3
GO:0016853	molecular function by up regulated genes	isomerase activity	2/257	71/3340	0.977491	0.997897	0.974938	CNAG_06098/CNAG_02484	2
GO:0008135	molecular function by up regulated genes	translation factor activity, RNA binding	2/257	82/3340	0.989621	0.997897	0.974938	CNAG_00104/CNAG_05597	2
GO:0003743	molecular function by up regulated genes	translation initiation factor activity	1/257	61/3340	0.992776	0.997897	0.974938	CNAG_05597	1
GO:0005515	molecular function by up regulated genes	protein binding	5/257	164/3340	0.996766	0.997897	0.974938	CNAG_01179/CNAG_02658/CNAG_02516/CNAG_05884/CNAG_08028	5
GO:0016874	molecular function by up regulated genes	ligase activity	2/257	104/3340	0.997897	0.997897	0.974938	CNAG_03807/CNAG_01680	2
GO:0016491	molecular function by down regulated genes	oxidoreductase activity	53/203	428/3340	9.28194e-08	1.55008e-05	1.48511e-05	CNAG_01464/CNAG_05258/CNAG_02460/CNAG_03194/CNAG_03465/CNAG_02984/CNAG_02692/CNAG_01078/CNAG_04326/CNAG_05059/CNAG_02553/CNAG_06672/CNAG_04523/CNAG_04926/CNAG_07745/CNAG_00519/CNAG_02814/CNAG_01027/CNAG_05329/CNAG_01737/CNAG_04189/CNAG_01558/CNAG_07491/CNAG_04264/CNAG_00115/CNAG_03226/CNAG_04112/CNAG_04663/CNAG_04325/CNAG_03948/CNAG_05041/CNAG_01846/CNAG_01777/CNAG_03275/CNAG_05035/CNAG_03556/CNA…	53
GO:0008238	molecular function by down regulated genes	exopeptidase activity	8/203	34/3340	0.000745529	0.0622517	0.0596423	CNAG_03128/CNAG_04988/CNAG_02888/CNAG_07509/CNAG_01928/CNAG_02966/CNAG_01026/CNAG_04141	8
GO:0046982	molecular function by down regulated genes	protein heterodimerization activity	6/203	23/3340	0.00197384	0.0877032	0.0840271	CNAG_06745/CNAG_06861/CNAG_06746/CNAG_07715/CNAG_05290/CNAG_06747	6
GO:0050662	molecular function by down regulated genes	coenzyme binding	15/203	109/3340	0.00210068	0.0877032	0.0840271	CNAG_05258/CNAG_04659/CNAG_02182/CNAG_04326/CNAG_06672/CNAG_04523/CNAG_03170/CNAG_04189/CNAG_04264/CNAG_01846/CNAG_01777/CNAG_03275/CNAG_03556/CNAG_06534/CNAG_03245	15
GO:0016903	molecular function by down regulated genes	oxidoreductase activity, acting on the aldehyde or oxo group of donors	5/203	17/3340	0.00267629	0.0893879	0.0856411	CNAG_05059/CNAG_06672/CNAG_04523/CNAG_04467/CNAG_07660	5
GO:0048037	molecular function by down regulated genes	cofactor binding	19/203	178/3340	0.0103647	0.288483	0.276391	CNAG_05258/CNAG_04659/CNAG_02182/CNAG_04326/CNAG_06672/CNAG_04523/CNAG_03170/CNAG_04189/CNAG_06448/CNAG_04264/CNAG_03948/CNAG_01846/CNAG_01777/CNAG_03275/CNAG_01609/CNAG_03556/CNAG_02852/CNAG_06534/CNAG_03245	19
GO:0016776	molecular function by down regulated genes	phosphotransferase activity, phosphate group as acceptor	3/203	10/3340	0.019312	0.385398	0.369244	CNAG_06001/CNAG_02007/CNAG_03592	3
GO:0016627	molecular function by down regulated genes	oxidoreductase activity, acting on the CH-CH group of donors	5/203	27/3340	0.0212708	0.385398	0.369244	CNAG_02460/CNAG_04189/CNAG_03226/CNAG_03275/CNAG_07356	5
GO:0016651	molecular function by down regulated genes	oxidoreductase activity, acting on NAD(P)H	5/203	28/3340	0.0246539	0.385398	0.369244	CNAG_02692/CNAG_03948/CNAG_05041/CNAG_00329/CNAG_07177	5
GO:0050661	molecular function by down regulated genes	NADP binding	4/203	19/3340	0.0249554	0.385398	0.369244	CNAG_04523/CNAG_03556/CNAG_06534/CNAG_03245	4
GO:0008235	molecular function by down regulated genes	metalloexopeptidase activity	3/203	11/3340	0.0253855	0.385398	0.369244	CNAG_04988/CNAG_01928/CNAG_04141	3
GO:0005507	molecular function by down regulated genes	copper ion binding	3/203	12/3340	0.0323627	0.410127	0.392936	CNAG_03465/CNAG_05626/CNAG_04000	3
GO:0016620	molecular function by down regulated genes	oxidoreductase activity, acting on the aldehyde or oxo group of donors, NAD or NADP as acceptor	3/203	12/3340	0.0323627	0.410127	0.392936	CNAG_06672/CNAG_04523/CNAG_04467	3
GO:0050660	molecular function by down regulated genes	flavin adenine dinucleotide binding	6/203	42/3340	0.039256	0.410127	0.392936	CNAG_05258/CNAG_04189/CNAG_04264/CNAG_01846/CNAG_03275/CNAG_03556	6
GO:0016811	molecular function by down regulated genes	hydrolase activity, acting on carbon-nitrogen (but not peptide) bonds, in linear amides	3/203	13/3340	0.0402322	0.410127	0.392936	CNAG_01044/CNAG_01382/CNAG_02365	3
GO:0008237	molecular function by down regulated genes	metallopeptidase activity	5/203	34/3340	0.0520822	0.410127	0.392936	CNAG_04988/CNAG_01928/CNAG_04275/CNAG_04141/CNAG_03507	5
GO:0070011	molecular function by down regulated genes	peptidase activity, acting on L-amino acid peptides	12/203	118/3340	0.0523293	0.410127	0.392936	CNAG_03128/CNAG_04988/CNAG_02888/CNAG_07509/CNAG_01928/CNAG_02966/CNAG_05792/CNAG_04275/CNAG_01026/CNAG_04141/CNAG_03872/CNAG_03507	12
GO:0016810	molecular function by down regulated genes	hydrolase activity, acting on carbon-nitrogen (but not peptide) bonds	6/203	45/3340	0.052493	0.410127	0.392936	CNAG_01072/CNAG_01044/CNAG_01382/CNAG_01230/CNAG_02365/CNAG_03592	6
GO:0046983	molecular function by down regulated genes	protein dimerization activity	6/203	45/3340	0.052493	0.410127	0.392936	CNAG_06745/CNAG_06861/CNAG_06746/CNAG_07715/CNAG_05290/CNAG_06747	6
GO:0004180	molecular function by down regulated genes	carboxypeptidase activity	3/203	15/3340	0.0585584	0.410127	0.392936	CNAG_04988/CNAG_02966/CNAG_04141	3
GO:0016614	molecular function by down regulated genes	oxidoreductase activity, acting on CH-OH group of donors	7/203	58/3340	0.0595073	0.410127	0.392936	CNAG_05258/CNAG_04326/CNAG_06672/CNAG_02814/CNAG_01777/CNAG_06534/CNAG_03245	7
GO:0016746	molecular function by down regulated genes	transferase activity, transferring acyl groups	8/203	70/3340	0.0596417	0.410127	0.392936	CNAG_02988/CNAG_02021/CNAG_02896/CNAG_01120/CNAG_04656/CNAG_00061/CNAG_03509/CNAG_05042	8
GO:0005506	molecular function by down regulated genes	iron ion binding	4/203	25/3340	0.0613963	0.410127	0.392936	CNAG_00519/CNAG_01737/CNAG_04325/CNAG_02577	4
GO:0020037	molecular function by down regulated genes	heme binding	4/203	25/3340	0.0613963	0.410127	0.392936	CNAG_01464/CNAG_05909/CNAG_02577/CNAG_05256	4
GO:0046906	molecular function by down regulated genes	tetrapyrrole binding	4/203	25/3340	0.0613963	0.410127	0.392936	CNAG_01464/CNAG_05909/CNAG_02577/CNAG_05256	4
GO:0016655	molecular function by down regulated genes	oxidoreductase activity, acting on NAD(P)H, quinone or similar compound as acceptor	3/203	16/3340	0.0689526	0.442888	0.424324	CNAG_03948/CNAG_00329/CNAG_07177	3
GO:0016791	molecular function by down regulated genes	phosphatase activity	6/203	52/3340	0.092834	0.574196	0.550127	CNAG_04120/CNAG_04224/CNAG_06418/CNAG_00057/CNAG_01177/CNAG_07354	6
GO:0008233	molecular function by down regulated genes	peptidase activity	12/203	134/3340	0.111273	0.642229	0.615309	CNAG_03128/CNAG_04988/CNAG_02888/CNAG_07509/CNAG_01928/CNAG_02966/CNAG_05792/CNAG_04275/CNAG_01026/CNAG_04141/CNAG_03872/CNAG_03507	12
GO:0009055	molecular function by down regulated genes	electron carrier activity	4/203	31/3340	0.115611	0.642229	0.615309	CNAG_05909/CNAG_07491/CNAG_03226/CNAG_07356	4
GO:0038023	molecular function by down regulated genes	signaling receptor activity	2/203	10/3340	0.119933	0.642229	0.615309	CNAG_00106/CNAG_03355	2
GO:0051537	molecular function by down regulated genes	2 iron, 2 sulfur cluster binding	2/203	10/3340	0.119933	0.642229	0.615309	CNAG_03226/CNAG_01846	2
GO:0042578	molecular function by down regulated genes	phosphoric ester hydrolase activity	7/203	69/3340	0.123062	0.642229	0.615309	CNAG_04120/CNAG_07638/CNAG_04224/CNAG_06418/CNAG_00057/CNAG_01177/CNAG_07354	7
GO:0004497	molecular function by down regulated genes	monooxygenase activity	3/203	21/3340	0.131575	0.653822	0.626416	CNAG_01737/CNAG_04264/CNAG_03556	3
GO:0051287	molecular function by down regulated genes	NAD binding	5/203	45/3340	0.134862	0.653822	0.626416	CNAG_04326/CNAG_06672/CNAG_04523/CNAG_03170/CNAG_01777	5
GO:0004872	molecular function by down regulated genes	receptor activity	2/203	11/3340	0.140944	0.653822	0.626416	CNAG_00106/CNAG_03355	2
GO:0060089	molecular function by down regulated genes	molecular transducer activity	2/203	11/3340	0.140944	0.653822	0.626416	CNAG_00106/CNAG_03355	2
GO:0016616	molecular function by down regulated genes	oxidoreductase activity, acting on the CH-OH group of donors, NAD or NADP as acceptor	5/203	50/3340	0.18472	0.787849	0.754825	CNAG_04326/CNAG_06672/CNAG_01777/CNAG_06534/CNAG_03245	5
GO:0004177	molecular function by down regulated genes	aminopeptidase activity	2/203	13/3340	0.184919	0.787849	0.754825	CNAG_07509/CNAG_01928	2
GO:0016830	molecular function by down regulated genes	carbon-carbon lyase activity	3/203	25/3340	0.191557	0.787849	0.754825	CNAG_06923/CNAG_05125/CNAG_06770	3
GO:0046914	molecular function by down regulated genes	transition metal ion binding	27/203	375/3340	0.195379	0.787849	0.754825	CNAG_03465/CNAG_06136/CNAG_03533/CNAG_03018/CNAG_00519/CNAG_03902/CNAG_06425/CNAG_04041/CNAG_01847/CNAG_01737/CNAG_05626/CNAG_01558/CNAG_04527/CNAG_00115/CNAG_03620/CNAG_03376/CNAG_04325/CNAG_07509/CNAG_04000/CNAG_06903/CNAG_06376/CNAG_00269/CNAG_02577/CNAG_00520/CNAG_02134/CNAG_06770/CNAG_04315	27
GO:0016407	molecular function by down regulated genes	acetyltransferase activity	3/203	26/3340	0.20751	0.787849	0.754825	CNAG_02988/CNAG_02021/CNAG_01120	3
GO:0003954	molecular function by down regulated genes	NADH dehydrogenase activity	2/203	14/3340	0.207577	0.787849	0.754825	CNAG_00329/CNAG_07177	2
GO:0008137	molecular function by down regulated genes	NADH dehydrogenase (ubiquinone) activity	2/203	14/3340	0.207577	0.787849	0.754825	CNAG_00329/CNAG_07177	2
GO:0050136	molecular function by down regulated genes	NADH dehydrogenase (quinone) activity	2/203	14/3340	0.207577	0.787849	0.754825	CNAG_00329/CNAG_07177	2
GO:0004222	molecular function by down regulated genes	metalloendopeptidase activity	2/203	17/3340	0.27671	0.983204	0.941992	CNAG_04275/CNAG_03507	2
GO:0005088	molecular function by down regulated genes	Ras guanyl-nucleotide exchange factor activity	2/203	17/3340	0.27671	0.983204	0.941992	CNAG_04119/CNAG_00547	2
GO:0005089	molecular function by down regulated genes	Rho guanyl-nucleotide exchange factor activity	2/203	17/3340	0.27671	0.983204	0.941992	CNAG_04119/CNAG_00547	2
GO:0051539	molecular function by down regulated genes	4 iron, 4 sulfur cluster binding	2/203	19/3340	0.322764	0.999994	0.958078	CNAG_03226/CNAG_05041	2
GO:0000287	molecular function by down regulated genes	magnesium ion binding	3/203	33/3340	0.324745	0.999994	0.958078	CNAG_04659/CNAG_02100/CNAG_06432	3
GO:0051536	molecular function by down regulated genes	iron-sulfur cluster binding	3/203	33/3340	0.324745	0.999994	0.958078	CNAG_03226/CNAG_05041/CNAG_01846	3
GO:0051540	molecular function by down regulated genes	metal cluster binding	3/203	33/3340	0.324745	0.999994	0.958078	CNAG_03226/CNAG_05041/CNAG_01846	3
GO:0016301	molecular function by down regulated genes	kinase activity	14/203	204/3340	0.356664	0.999994	0.958078	CNAG_02542/CNAG_04083/CNAG_00106/CNAG_03216/CNAG_03355/CNAG_02459/CNAG_06001/CNAG_02007/CNAG_07744/CNAG_06432/CNAG_05694/CNAG_06730/CNAG_03592/CNAG_05063	14
GO:0004871	molecular function by down regulated genes	signal transducer activity	2/203	21/3340	0.368062	0.999994	0.958078	CNAG_00106/CNAG_03355	2
GO:0016705	molecular function by down regulated genes	oxidoreductase activity, acting on paired donors, with incorporation or reduction of molecular oxygen	2/203	21/3340	0.368062	0.999994	0.958078	CNAG_04264/CNAG_03556	2
GO:0019842	molecular function by down regulated genes	vitamin binding	4/203	51/3340	0.375798	0.999994	0.958078	CNAG_04659/CNAG_06448/CNAG_01609/CNAG_02852	4
GO:0044877	molecular function by down regulated genes	macromolecular complex binding	2/203	22/3340	0.390279	0.999994	0.958078	CNAG_05240/CNAG_03191	2
GO:0008080	molecular function by down regulated genes	N-acetyltransferase activity	2/203	23/3340	0.412144	0.999994	0.958078	CNAG_02988/CNAG_02021	2
GO:0098772	molecular function by down regulated genes	molecular function regulator	5/203	70/3340	0.42267	0.999994	0.958078	CNAG_05050/CNAG_06175/CNAG_03191/CNAG_04119/CNAG_00547	5
GO:0016410	molecular function by down regulated genes	N-acyltransferase activity	2/203	25/3340	0.454666	0.999994	0.958078	CNAG_02988/CNAG_02021	2
GO:0030170	molecular function by down regulated genes	pyridoxal phosphate binding	3/203	41/3340	0.458767	0.999994	0.958078	CNAG_06448/CNAG_01609/CNAG_02852	3
GO:0070279	molecular function by down regulated genes	vitamin B6 binding	3/203	41/3340	0.458767	0.999994	0.958078	CNAG_06448/CNAG_01609/CNAG_02852	3
GO:0000981	molecular function by down regulated genes	RNA polymerase II transcription factor activity, sequence-specific DNA binding	8/203	122/3340	0.465768	0.999994	0.958078	CNAG_06136/CNAG_03018/CNAG_03902/CNAG_06425/CNAG_04041/CNAG_01847/CNAG_01173/CNAG_03620	8
GO:0005096	molecular function by down regulated genes	GTPase activator activity	1/203	10/3340	0.466295	0.999994	0.958078	CNAG_05050	1
GO:0016645	molecular function by down regulated genes	oxidoreductase activity, acting on the CH-NH group of donors	1/203	10/3340	0.466295	0.999994	0.958078	CNAG_00760	1
GO:0016684	molecular function by down regulated genes	oxidoreductase activity, acting on peroxide as acceptor	1/203	10/3340	0.466295	0.999994	0.958078	CNAG_05256	1
GO:0016861	molecular function by down regulated genes	intramolecular oxidoreductase activity, interconverting aldoses and ketoses	1/203	10/3340	0.466295	0.999994	0.958078	CNAG_01395	1
GO:0016884	molecular function by down regulated genes	carbon-nitrogen ligase activity, with glutamine as amido-N-donor	1/203	10/3340	0.466295	0.999994	0.958078	CNAG_01382	1
GO:0019205	molecular function by down regulated genes	nucleobase-containing compound kinase activity	1/203	10/3340	0.466295	0.999994	0.958078	CNAG_02007	1
GO:0016829	molecular function by down regulated genes	lyase activity	6/203	90/3340	0.469451	0.999994	0.958078	CNAG_04043/CNAG_06923/CNAG_06448/CNAG_05125/CNAG_05809/CNAG_06770	6
GO:0051213	molecular function by down regulated genes	dioxygenase activity	2/203	26/3340	0.475262	0.999994	0.958078	CNAG_01464/CNAG_04325	2
GO:0016772	molecular function by down regulated genes	transferase activity, transferring phosphorus-containing groups	18/203	286/3340	0.475305	0.999994	0.958078	CNAG_02542/CNAG_04083/CNAG_00106/CNAG_07822/CNAG_03216/CNAG_05226/CNAG_03355/CNAG_02459/CNAG_06001/CNAG_02007/CNAG_02100/CNAG_07744/CNAG_06432/CNAG_05694/CNAG_06730/CNAG_02534/CNAG_03592/CNAG_05063	18
GO:0004553	molecular function by down regulated genes	hydrolase activity, hydrolyzing O-glycosyl compounds	4/203	59/3340	0.486727	0.999994	0.958078	CNAG_00122/CNAG_04245/CNAG_06924/CNAG_04879	4
GO:0030234	molecular function by down regulated genes	enzyme regulator activity	3/203	43/3340	0.490685	0.999994	0.958078	CNAG_05050/CNAG_06175/CNAG_03191	3
GO:0005085	molecular function by down regulated genes	guanyl-nucleotide exchange factor activity	2/203	27/3340	0.495383	0.999994	0.958078	CNAG_04119/CNAG_00547	2
GO:0015036	molecular function by down regulated genes	disulfide oxidoreductase activity	1/203	11/3340	0.49883	0.999994	0.958078	CNAG_07491	1
GO:0071949	molecular function by down regulated genes	FAD binding	1/203	11/3340	0.49883	0.999994	0.958078	CNAG_04264	1
GO:0003777	molecular function by down regulated genes	microtubule motor activity	1/203	12/3340	0.529391	0.999994	0.958078	CNAG_05752	1
GO:0043021	molecular function by down regulated genes	ribonucleoprotein complex binding	1/203	12/3340	0.529391	0.999994	0.958078	CNAG_05240	1
GO:0004721	molecular function by down regulated genes	phosphoprotein phosphatase activity	2/203	30/3340	0.552728	0.999994	0.958078	CNAG_04120/CNAG_06418	2
GO:0016879	molecular function by down regulated genes	ligase activity, forming carbon-nitrogen bonds	2/203	30/3340	0.552728	0.999994	0.958078	CNAG_01382/CNAG_05759	2
GO:0008081	molecular function by down regulated genes	phosphoric diester hydrolase activity	1/203	13/3340	0.558097	0.999994	0.958078	CNAG_07638	1
GO:0016860	molecular function by down regulated genes	intramolecular oxidoreductase activity	1/203	13/3340	0.558097	0.999994	0.958078	CNAG_01395	1
GO:0030695	molecular function by down regulated genes	GTPase regulator activity	1/203	13/3340	0.558097	0.999994	0.958078	CNAG_05050	1
GO:0016788	molecular function by down regulated genes	hydrolase activity, acting on ester bonds	10/203	166/3340	0.560802	0.999994	0.958078	CNAG_04120/CNAG_02175/CNAG_07638/CNAG_04224/CNAG_06418/CNAG_00057/CNAG_03213/CNAG_01177/CNAG_04104/CNAG_07354	10
GO:0016798	molecular function by down regulated genes	hydrolase activity, acting on glycosyl bonds	4/203	65/3340	0.564515	0.999994	0.958078	CNAG_00122/CNAG_04245/CNAG_06924/CNAG_04879	4
GO:0004298	molecular function by down regulated genes	threonine-type endopeptidase activity	1/203	14/3340	0.58506	0.999994	0.958078	CNAG_05792	1
GO:0070003	molecular function by down regulated genes	threonine-type peptidase activity	1/203	14/3340	0.58506	0.999994	0.958078	CNAG_05792	1
GO:0005509	molecular function by down regulated genes	calcium ion binding	2/203	32/3340	0.588341	0.999994	0.958078	CNAG_00122/CNAG_02814	2
GO:0016747	molecular function by down regulated genes	transferase activity, transferring acyl groups other than amino-acyl groups	3/203	50/3340	0.594371	0.999994	0.958078	CNAG_02988/CNAG_02021/CNAG_01120	3
GO:0015171	molecular function by down regulated genes	amino acid transmembrane transporter activity	1/203	15/3340	0.610386	0.999994	0.958078	CNAG_02455	1
GO:0003774	molecular function by down regulated genes	motor activity	1/203	16/3340	0.634173	0.999994	0.958078	CNAG_05752	1
GO:0005342	molecular function by down regulated genes	organic acid transmembrane transporter activity	1/203	16/3340	0.634173	0.999994	0.958078	CNAG_02455	1
GO:0008017	molecular function by down regulated genes	microtubule binding	1/203	16/3340	0.634173	0.999994	0.958078	CNAG_05752	1
GO:0008514	molecular function by down regulated genes	organic anion transmembrane transporter activity	1/203	16/3340	0.634173	0.999994	0.958078	CNAG_02455	1
GO:0008565	molecular function by down regulated genes	protein transporter activity	1/203	16/3340	0.634173	0.999994	0.958078	CNAG_05248	1
GO:0015197	molecular function by down regulated genes	peptide transporter activity	1/203	16/3340	0.634173	0.999994	0.958078	CNAG_05248	1
GO:0016831	molecular function by down regulated genes	carboxy-lyase activity	1/203	16/3340	0.634173	0.999994	0.958078	CNAG_05125	1
GO:0035091	molecular function by down regulated genes	phosphatidylinositol binding	1/203	16/3340	0.634173	0.999994	0.958078	CNAG_06664	1
GO:0046943	molecular function by down regulated genes	carboxylic acid transmembrane transporter activity	1/203	16/3340	0.634173	0.999994	0.958078	CNAG_02455	1
GO:0008270	molecular function by down regulated genes	zinc ion binding	19/203	330/3340	0.637889	0.999994	0.958078	CNAG_06136/CNAG_03533/CNAG_03018/CNAG_03902/CNAG_06425/CNAG_04041/CNAG_01847/CNAG_01558/CNAG_04527/CNAG_00115/CNAG_03620/CNAG_03376/CNAG_04325/CNAG_06376/CNAG_00269/CNAG_00520/CNAG_02134/CNAG_06770/CNAG_04315	19
GO:0003690	molecular function by down regulated genes	double-stranded DNA binding	1/203	17/3340	0.656514	0.999994	0.958078	CNAG_01173	1
GO:0008047	molecular function by down regulated genes	enzyme activator activity	1/203	17/3340	0.656514	0.999994	0.958078	CNAG_05050	1
GO:0016209	molecular function by down regulated genes	antioxidant activity	1/203	17/3340	0.656514	0.999994	0.958078	CNAG_05256	1
GO:0060589	molecular function by down regulated genes	nucleoside-triphosphatase regulator activity	1/203	17/3340	0.656514	0.999994	0.958078	CNAG_05050	1
GO:0004672	molecular function by down regulated genes	protein kinase activity	6/203	109/3340	0.659823	0.999994	0.958078	CNAG_00106/CNAG_03216/CNAG_03355/CNAG_05694/CNAG_06730/CNAG_05063	6
GO:0005515	molecular function by down regulated genes	protein binding	9/203	164/3340	0.676148	0.999994	0.958078	CNAG_06745/CNAG_06861/CNAG_06746/CNAG_03620/CNAG_07715/CNAG_05752/CNAG_05290/CNAG_03191/CNAG_06747	9
GO:0003746	molecular function by down regulated genes	translation elongation factor activity	1/203	18/3340	0.677498	0.999994	0.958078	CNAG_01843	1
GO:0016765	molecular function by down regulated genes	transferase activity, transferring alkyl or aryl (other than methyl) groups	1/203	18/3340	0.677498	0.999994	0.958078	CNAG_01667	1
GO:0019783	molecular function by down regulated genes	ubiquitin-like protein-specific protease activity	1/203	18/3340	0.677498	0.999994	0.958078	CNAG_03872	1
GO:0036459	molecular function by down regulated genes	thiol-dependent ubiquitinyl hydrolase activity	1/203	18/3340	0.677498	0.999994	0.958078	CNAG_03872	1
GO:0101005	molecular function by down regulated genes	ubiquitinyl hydrolase activity	1/203	18/3340	0.677498	0.999994	0.958078	CNAG_03872	1
GO:0005543	molecular function by down regulated genes	phospholipid binding	1/203	19/3340	0.697205	0.999994	0.958078	CNAG_06664	1
GO:0004175	molecular function by down regulated genes	endopeptidase activity	3/203	61/3340	0.727449	0.999994	0.958078	CNAG_05792/CNAG_04275/CNAG_03507	3
GO:0016667	molecular function by down regulated genes	oxidoreductase activity, acting on a sulfur group of donors	1/203	21/3340	0.733096	0.999994	0.958078	CNAG_07491	1
GO:0001071	molecular function by down regulated genes	nucleic acid binding transcription factor activity	9/203	173/3340	0.736708	0.999994	0.958078	CNAG_06136/CNAG_03018/CNAG_03902/CNAG_06425/CNAG_04041/CNAG_01847/CNAG_01173/CNAG_07560/CNAG_03620	9
GO:0003700	molecular function by down regulated genes	transcription factor activity, sequence-specific DNA binding	9/203	173/3340	0.736708	0.999994	0.958078	CNAG_06136/CNAG_03018/CNAG_03902/CNAG_06425/CNAG_04041/CNAG_01847/CNAG_01173/CNAG_07560/CNAG_03620	9
GO:0008289	molecular function by down regulated genes	lipid binding	1/203	22/3340	0.749421	0.999994	0.958078	CNAG_06664	1
GO:0004527	molecular function by down regulated genes	exonuclease activity	1/203	23/3340	0.764752	0.999994	0.958078	CNAG_02175	1
GO:0008026	molecular function by down regulated genes	ATP-dependent helicase activity	1/203	23/3340	0.764752	0.999994	0.958078	CNAG_06440	1
GO:0015631	molecular function by down regulated genes	tubulin binding	1/203	23/3340	0.764752	0.999994	0.958078	CNAG_05752	1
GO:0070035	molecular function by down regulated genes	purine NTP-dependent helicase activity	1/203	23/3340	0.764752	0.999994	0.958078	CNAG_06440	1
GO:0008234	molecular function by down regulated genes	cysteine-type peptidase activity	1/203	24/3340	0.779149	0.999994	0.958078	CNAG_03872	1
GO:0008483	molecular function by down regulated genes	transaminase activity	1/203	24/3340	0.779149	0.999994	0.958078	CNAG_02852	1
GO:0016769	molecular function by down regulated genes	transferase activity, transferring nitrogenous groups	1/203	24/3340	0.779149	0.999994	0.958078	CNAG_02852	1
GO:0022891	molecular function by down regulated genes	substrate-specific transmembrane transporter activity	8/203	164/3340	0.792021	0.999994	0.958078	CNAG_06290/CNAG_06963/CNAG_05914/CNAG_05662/CNAG_02733/CNAG_00727/CNAG_07481/CNAG_02455	8
GO:0008509	molecular function by down regulated genes	anion transmembrane transporter activity	1/203	25/3340	0.792669	0.999994	0.958078	CNAG_02455	1
GO:0022892	molecular function by down regulated genes	substrate-specific transporter activity	9/203	185/3340	0.804948	0.999994	0.958078	CNAG_06290/CNAG_06963/CNAG_05914/CNAG_05662/CNAG_02733/CNAG_00727/CNAG_07481/CNAG_05248/CNAG_02455	9
GO:0004674	molecular function by down regulated genes	protein serine/threonine kinase activity	2/203	49/3340	0.80903	0.999994	0.958078	CNAG_05694/CNAG_06730	2
GO:0016853	molecular function by down regulated genes	isomerase activity	3/203	71/3340	0.816535	0.999994	0.958078	CNAG_01539/CNAG_01341/CNAG_01395	3
GO:0008236	molecular function by down regulated genes	serine-type peptidase activity	1/203	27/3340	0.817288	0.999994	0.958078	CNAG_02966	1
GO:0010181	molecular function by down regulated genes	FMN binding	1/203	27/3340	0.817288	0.999994	0.958078	CNAG_03948	1
GO:0017171	molecular function by down regulated genes	serine hydrolase activity	1/203	27/3340	0.817288	0.999994	0.958078	CNAG_02966	1
GO:0046873	molecular function by down regulated genes	metal ion transmembrane transporter activity	1/203	28/3340	0.828483	0.999994	0.958078	CNAG_07481	1
GO:0004812	molecular function by down regulated genes	aminoacyl-tRNA ligase activity	1/203	30/3340	0.848867	0.999994	0.958078	CNAG_04896	1
GO:0016875	molecular function by down regulated genes	ligase activity, forming carbon-oxygen bonds	1/203	30/3340	0.848867	0.999994	0.958078	CNAG_04896	1
GO:0016876	molecular function by down regulated genes	ligase activity, forming aminoacyl-tRNA and related compounds	1/203	30/3340	0.848867	0.999994	0.958078	CNAG_04896	1
GO:0016758	molecular function by down regulated genes	transferase activity, transferring hexosyl groups	1/203	34/3340	0.882683	0.999994	0.958078	CNAG_04879	1
GO:0043565	molecular function by down regulated genes	sequence-specific DNA binding	2/203	62/3340	0.899454	0.999994	0.958078	CNAG_01173/CNAG_07560	2
GO:0016773	molecular function by down regulated genes	phosphotransferase activity, alcohol group as acceptor	6/203	150/3340	0.903753	0.999994	0.958078	CNAG_00106/CNAG_03216/CNAG_03355/CNAG_05694/CNAG_06730/CNAG_05063	6
GO:0003723	molecular function by down regulated genes	RNA binding	9/203	213/3340	0.912095	0.999994	0.958078	CNAG_05106/CNAG_02362/CNAG_05240/CNAG_03314/CNAG_01843/CNAG_06903/CNAG_02175/CNAG_04896/CNAG_07689	9
GO:0005215	molecular function by down regulated genes	transporter activity	11/203	254/3340	0.916836	0.999994	0.958078	CNAG_01119/CNAG_06290/CNAG_06963/CNAG_05914/CNAG_05662/CNAG_02733/CNAG_03051/CNAG_00727/CNAG_07481/CNAG_05248/CNAG_02455	11
GO:0004519	molecular function by down regulated genes	endonuclease activity	1/203	41/3340	0.924746	0.999994	0.958078	CNAG_03213	1
GO:0004518	molecular function by down regulated genes	nuclease activity	2/203	69/3340	0.929796	0.999994	0.958078	CNAG_02175/CNAG_03213	2
GO:0016779	molecular function by down regulated genes	nucleotidyltransferase activity	2/203	69/3340	0.929796	0.999994	0.958078	CNAG_07822/CNAG_05226	2
GO:0003677	molecular function by down regulated genes	DNA binding	13/203	301/3340	0.934274	0.999994	0.958078	CNAG_06745/CNAG_03018/CNAG_06425/CNAG_04041/CNAG_01173/CNAG_07560/CNAG_06746/CNAG_05131/CNAG_00240/CNAG_02134/CNAG_04168/CNAG_06744/CNAG_06747	13
GO:0022857	molecular function by down regulated genes	transmembrane transporter activity	8/203	206/3340	0.942494	0.999994	0.958078	CNAG_06290/CNAG_06963/CNAG_05914/CNAG_05662/CNAG_02733/CNAG_00727/CNAG_07481/CNAG_02455	8
GO:0008092	molecular function by down regulated genes	cytoskeletal protein binding	1/203	46/3340	0.94523	0.999994	0.958078	CNAG_05752	1
GO:0016874	molecular function by down regulated genes	ligase activity	3/203	104/3340	0.95789	0.999994	0.958078	CNAG_01382/CNAG_04896/CNAG_05759	3
GO:0008324	molecular function by down regulated genes	cation transmembrane transporter activity	2/203	81/3340	0.962741	0.999994	0.958078	CNAG_00727/CNAG_07481	2
GO:0008135	molecular function by down regulated genes	translation factor activity, RNA binding	2/203	82/3340	0.964689	0.999994	0.958078	CNAG_05106/CNAG_01843	2
GO:0015075	molecular function by down regulated genes	ion transmembrane transporter activity	3/203	110/3340	0.96844	0.999994	0.958078	CNAG_00727/CNAG_07481/CNAG_02455	3
GO:0022890	molecular function by down regulated genes	inorganic cation transmembrane transporter activity	1/203	70/3340	0.988166	0.999994	0.958078	CNAG_07481	1
GO:0042623	molecular function by down regulated genes	ATPase activity, coupled	1/203	74/3340	0.990843	0.999994	0.958078	CNAG_06440	1
GO:0004386	molecular function by down regulated genes	helicase activity	1/203	76/3340	0.991946	0.999994	0.958078	CNAG_06440	1
GO:0016757	molecular function by down regulated genes	transferase activity, transferring glycosyl groups	1/203	76/3340	0.991946	0.999994	0.958078	CNAG_04879	1
GO:0008168	molecular function by down regulated genes	methyltransferase activity	1/203	83/3340	0.994864	0.999994	0.958078	CNAG_02182	1
GO:0016741	molecular function by down regulated genes	transferase activity, transferring one-carbon groups	1/203	89/3340	0.99651	0.999994	0.958078	CNAG_02182	1
GO:0016887	molecular function by down regulated genes	ATPase activity	1/203	95/3340	0.997631	0.999994	0.958078	CNAG_06440	1
GO:0005524	molecular function by down regulated genes	ATP binding	15/203	452/3340	0.998362	0.999994	0.958078	CNAG_03452/CNAG_05125/CNAG_01382/CNAG_03216/CNAG_05752/CNAG_06001/CNAG_04896/CNAG_06440/CNAG_02007/CNAG_05759/CNAG_07347/CNAG_06432/CNAG_05694/CNAG_06730/CNAG_05063	15
GO:0005198	molecular function by down regulated genes	structural molecule activity	2/203	137/3340	0.998415	0.999994	0.958078	CNAG_01199/CNAG_04726	2
GO:0032559	molecular function by down regulated genes	adenyl ribonucleotide binding	15/203	453/3340	0.998423	0.999994	0.958078	CNAG_03452/CNAG_05125/CNAG_01382/CNAG_03216/CNAG_05752/CNAG_06001/CNAG_04896/CNAG_06440/CNAG_02007/CNAG_05759/CNAG_07347/CNAG_06432/CNAG_05694/CNAG_06730/CNAG_05063	15
GO:0030554	molecular function by down regulated genes	adenyl nucleotide binding	15/203	454/3340	0.998483	0.999994	0.958078	CNAG_03452/CNAG_05125/CNAG_01382/CNAG_03216/CNAG_05752/CNAG_06001/CNAG_04896/CNAG_06440/CNAG_02007/CNAG_05759/CNAG_07347/CNAG_06432/CNAG_05694/CNAG_06730/CNAG_05063	15
GO:0003735	molecular function by down regulated genes	structural constituent of ribosome	1/203	121/3340	0.999561	0.999994	0.958078	CNAG_04726	1
GO:0017111	molecular function by down regulated genes	nucleoside-triphosphatase activity	2/203	214/3340	0.999985	0.999994	0.958078	CNAG_05752/CNAG_06440	2
GO:0016462	molecular function by down regulated genes	pyrophosphatase activity	2/203	222/3340	0.999991	0.999994	0.958078	CNAG_05752/CNAG_06440	2
GO:0016818	molecular function by down regulated genes	hydrolase activity, acting on acid anhydrides, in phosphorus-containing anhydrides	2/203	225/3340	0.999993	0.999994	0.958078	CNAG_05752/CNAG_06440	2
GO:0016817	molecular function by down regulated genes	hydrolase activity, acting on acid anhydrides	2/203	228/3340	0.999994	0.999994	0.958078	CNAG_05752/CNAG_06440	2
GO:0005730	cellular component by up regulated genes	nucleolus	11/255	29/2620	4.22068e-05	0.00266583	0.00266583	CNAG_02378/CNAG_03975/CNAG_00775/CNAG_03624/CNAG_03762/CNAG_03521/CNAG_03284/CNAG_05755/CNAG_07413/CNAG_01810/CNAG_06468	11
GO:0030684	cellular component by up regulated genes	preribosome	7/255	13/2620	7.84068e-05	0.00266583	0.00266583	CNAG_05151/CNAG_02162/CNAG_06766/CNAG_03975/CNAG_03624/CNAG_03762/CNAG_06007	7
GO:0031981	cellular component by up regulated genes	nuclear lumen	13/255	99/2620	0.160213	1	1	CNAG_02378/CNAG_01736/CNAG_03975/CNAG_00775/CNAG_03624/CNAG_03491/CNAG_03762/CNAG_03521/CNAG_03284/CNAG_05755/CNAG_07413/CNAG_01810/CNAG_06468	13
GO:0005886	cellular component by up regulated genes	plasma membrane	4/255	24/2620	0.199863	1	1	CNAG_05654/CNAG_04867/CNAG_06424/CNAG_06242	4
GO:0019012	cellular component by up regulated genes	virion	4/255	25/2620	0.221058	1	1	CNAG_02454/CNAG_02378/CNAG_05228/CNAG_07864	4
GO:0019013	cellular component by up regulated genes	viral nucleocapsid	4/255	25/2620	0.221058	1	1	CNAG_02454/CNAG_02378/CNAG_05228/CNAG_07864	4
GO:0019028	cellular component by up regulated genes	viral capsid	4/255	25/2620	0.221058	1	1	CNAG_02454/CNAG_02378/CNAG_05228/CNAG_07864	4
GO:0044423	cellular component by up regulated genes	virion part	4/255	25/2620	0.221058	1	1	CNAG_02454/CNAG_02378/CNAG_05228/CNAG_07864	4
GO:0031974	cellular component by up regulated genes	membrane-enclosed lumen	14/255	125/2620	0.328735	1	1	CNAG_02378/CNAG_01736/CNAG_03975/CNAG_00775/CNAG_04039/CNAG_03624/CNAG_03491/CNAG_03762/CNAG_03521/CNAG_03284/CNAG_05755/CNAG_07413/CNAG_01810/CNAG_06468	14
GO:0043233	cellular component by up regulated genes	organelle lumen	14/255	125/2620	0.328735	1	1	CNAG_02378/CNAG_01736/CNAG_03975/CNAG_00775/CNAG_04039/CNAG_03624/CNAG_03491/CNAG_03762/CNAG_03521/CNAG_03284/CNAG_05755/CNAG_07413/CNAG_01810/CNAG_06468	14
GO:0070013	cellular component by up regulated genes	intracellular organelle lumen	14/255	125/2620	0.328735	1	1	CNAG_02378/CNAG_01736/CNAG_03975/CNAG_00775/CNAG_04039/CNAG_03624/CNAG_03491/CNAG_03762/CNAG_03521/CNAG_03284/CNAG_05755/CNAG_07413/CNAG_01810/CNAG_06468	14
GO:0044459	cellular component by up regulated genes	plasma membrane part	2/255	12/2620	0.328746	1	1	CNAG_04867/CNAG_06242	2
GO:0000775	cellular component by up regulated genes	chromosome, centromeric region	2/255	14/2620	0.401841	1	1	CNAG_01736/CNAG_00680	2
GO:0071944	cellular component by up regulated genes	cell periphery	4/255	37/2620	0.492359	1	1	CNAG_05654/CNAG_04867/CNAG_06424/CNAG_06242	4
GO:0098687	cellular component by up regulated genes	chromosomal region	2/255	18/2620	0.535136	1	1	CNAG_01736/CNAG_00680	2
GO:0000794	cellular component by up regulated genes	condensed nuclear chromosome	1/255	10/2620	0.641497	1	1	CNAG_01736	1
GO:0000776	cellular component by up regulated genes	kinetochore	1/255	11/2620	0.676524	1	1	CNAG_01736	1
GO:0030176	cellular component by up regulated genes	integral component of endoplasmic reticulum membrane	1/255	12/2620	0.70814	1	1	CNAG_04574	1
GO:0031227	cellular component by up regulated genes	intrinsic component of endoplasmic reticulum membrane	1/255	12/2620	0.70814	1	1	CNAG_04574	1
GO:0005819	cellular component by up regulated genes	spindle	1/255	14/2620	0.762433	1	1	CNAG_01736	1
GO:0044428	cellular component by up regulated genes	nuclear part	13/255	157/2620	0.776013	1	1	CNAG_02378/CNAG_01736/CNAG_03975/CNAG_00775/CNAG_03624/CNAG_03491/CNAG_03762/CNAG_03521/CNAG_03284/CNAG_05755/CNAG_07413/CNAG_01810/CNAG_06468	13
GO:0005741	cellular component by up regulated genes	mitochondrial outer membrane	1/255	15/2620	0.785679	1	1	CNAG_06345	1
GO:0031300	cellular component by up regulated genes	intrinsic component of organelle membrane	1/255	15/2620	0.785679	1	1	CNAG_06345	1
GO:0031301	cellular component by up regulated genes	integral component of organelle membrane	1/255	15/2620	0.785679	1	1	CNAG_06345	1
GO:0031968	cellular component by up regulated genes	organelle outer membrane	1/255	15/2620	0.785679	1	1	CNAG_06345	1
GO:1990204	cellular component by up regulated genes	oxidoreductase complex	1/255	15/2620	0.785679	1	1	CNAG_06242	1
GO:0019867	cellular component by up regulated genes	outer membrane	1/255	16/2620	0.806659	1	1	CNAG_06345	1
GO:0005654	cellular component by up regulated genes	nucleoplasm	3/255	49/2620	0.870281	1	1	CNAG_03975/CNAG_03624/CNAG_03491	3
GO:0000793	cellular component by up regulated genes	condensed chromosome	1/255	21/2620	0.884561	1	1	CNAG_01736	1
GO:0005759	cellular component by up regulated genes	mitochondrial matrix	1/255	22/2620	0.895887	1	1	CNAG_04039	1
GO:0044454	cellular component by up regulated genes	nuclear chromosome part	1/255	22/2620	0.895887	1	1	CNAG_01736	1
GO:0098798	cellular component by up regulated genes	mitochondrial protein complex	1/255	24/2620	0.915326	1	1	CNAG_06345	1
GO:0000228	cellular component by up regulated genes	nuclear chromosome	1/255	26/2620	0.931146	1	1	CNAG_01736	1
GO:0015630	cellular component by up regulated genes	microtubule cytoskeleton	1/255	31/2620	0.958975	1	1	CNAG_01736	1
GO:0044455	cellular component by up regulated genes	mitochondrial membrane part	1/255	33/2620	0.96666	1	1	CNAG_06345	1
GO:0044427	cellular component by up regulated genes	chromosomal part	2/255	54/2620	0.973997	1	1	CNAG_01736/CNAG_00680	2
GO:0005794	cellular component by up regulated genes	Golgi apparatus	1/255	36/2620	0.975582	1	1	CNAG_03426	1
GO:0044432	cellular component by up regulated genes	endoplasmic reticulum part	2/255	59/2620	0.983347	1	1	CNAG_06345/CNAG_04574	2
GO:0031966	cellular component by up regulated genes	mitochondrial membrane	3/255	79/2620	0.987077	1	1	CNAG_06345/CNAG_04712/CNAG_06102	3
GO:0044430	cellular component by up regulated genes	cytoskeletal part	1/255	44/2620	0.989378	1	1	CNAG_01736	1
GO:0044451	cellular component by up regulated genes	nucleoplasm part	1/255	45/2620	0.990429	1	1	CNAG_03491	1
GO:0030529	cellular component by up regulated genes	intracellular ribonucleoprotein complex	12/255	212/2620	0.990458	1	1	CNAG_02454/CNAG_05151/CNAG_02378/CNAG_02162/CNAG_06766/CNAG_03975/CNAG_01812/CNAG_05228/CNAG_03624/CNAG_03762/CNAG_07864/CNAG_06007	12
GO:1990904	cellular component by up regulated genes	ribonucleoprotein complex	12/255	212/2620	0.990458	1	1	CNAG_02454/CNAG_05151/CNAG_02378/CNAG_02162/CNAG_06766/CNAG_03975/CNAG_01812/CNAG_05228/CNAG_03624/CNAG_03762/CNAG_07864/CNAG_06007	12
GO:0005740	cellular component by up regulated genes	mitochondrial envelope	3/255	84/2620	0.99147	1	1	CNAG_06345/CNAG_04712/CNAG_06102	3
GO:0005694	cellular component by up regulated genes	chromosome	2/255	67/2620	0.991943	1	1	CNAG_01736/CNAG_00680	2
GO:0098805	cellular component by up regulated genes	whole membrane	1/255	47/2620	0.992231	1	1	CNAG_06345	1
GO:0005856	cellular component by up regulated genes	cytoskeleton	1/255	48/2620	0.993001	1	1	CNAG_01736	1
GO:0044429	cellular component by up regulated genes	mitochondrial part	4/255	105/2620	0.994097	1	1	CNAG_06345/CNAG_04712/CNAG_04039/CNAG_06102	4
GO:0005783	cellular component by up regulated genes	endoplasmic reticulum	2/255	75/2620	0.996155	1	1	CNAG_06345/CNAG_04574	2
GO:0031967	cellular component by up regulated genes	organelle envelope	3/255	97/2620	0.997189	1	1	CNAG_06345/CNAG_04712/CNAG_06102	3
GO:0031975	cellular component by up regulated genes	envelope	3/255	97/2620	0.997189	1	1	CNAG_06345/CNAG_04712/CNAG_06102	3
GO:0005789	cellular component by up regulated genes	endoplasmic reticulum membrane	1/255	57/2620	0.99727	1	1	CNAG_04574	1
GO:0042175	cellular component by up regulated genes	nuclear outer membrane-endoplasmic reticulum membrane network	1/255	57/2620	0.99727	1	1	CNAG_04574	1
GO:0005743	cellular component by up regulated genes	mitochondrial inner membrane	1/255	58/2620	0.997541	1	1	CNAG_06102	1
GO:0019866	cellular component by up regulated genes	organelle inner membrane	1/255	59/2620	0.997786	1	1	CNAG_06102	1
GO:0098588	cellular component by up regulated genes	bounding membrane of organelle	1/255	60/2620	0.998006	1	1	CNAG_06345	1
GO:0098796	cellular component by up regulated genes	membrane protein complex	2/255	85/2620	0.9985	1	1	CNAG_06345/CNAG_06242	2
GO:0043228	cellular component by up regulated genes	non-membrane-bounded organelle	14/255	270/2620	0.998534	1	1	CNAG_02378/CNAG_01736/CNAG_03975/CNAG_00775/CNAG_00680/CNAG_01812/CNAG_03624/CNAG_03762/CNAG_03521/CNAG_03284/CNAG_05755/CNAG_07413/CNAG_01810/CNAG_06468	14
GO:0043232	cellular component by up regulated genes	intracellular non-membrane-bounded organelle	14/255	270/2620	0.998534	1	1	CNAG_02378/CNAG_01736/CNAG_03975/CNAG_00775/CNAG_00680/CNAG_01812/CNAG_03624/CNAG_03762/CNAG_03521/CNAG_03284/CNAG_05755/CNAG_07413/CNAG_01810/CNAG_06468	14
GO:0031090	cellular component by up regulated genes	organelle membrane	3/255	127/2620	0.99981	1	1	CNAG_06345/CNAG_04712/CNAG_06102	3
GO:0012505	cellular component by up regulated genes	endomembrane system	3/255	129/2620	0.999842	1	1	CNAG_06345/CNAG_03426/CNAG_04574	3
GO:0005739	cellular component by up regulated genes	mitochondrion	4/255	155/2620	0.999916	1	1	CNAG_06345/CNAG_04712/CNAG_04039/CNAG_06102	4
GO:1902494	cellular component by up regulated genes	catalytic complex	1/255	131/2620	0.999999	1	1	CNAG_06242	1
GO:0005840	cellular component by up regulated genes	ribosome	1/255	132/2620	0.999999	1	1	CNAG_01812	1
GO:0044422	cellular component by up regulated genes	organelle part	19/255	453/2620	0.999999	1	1	CNAG_06345/CNAG_02378/CNAG_01736/CNAG_03975/CNAG_04712/CNAG_00775/CNAG_00680/CNAG_04039/CNAG_04574/CNAG_03624/CNAG_03491/CNAG_06102/CNAG_03762/CNAG_03521/CNAG_03284/CNAG_05755/CNAG_07413/CNAG_01810/CNAG_06468	19
GO:0044446	cellular component by up regulated genes	intracellular organelle part	19/255	453/2620	0.999999	1	1	CNAG_06345/CNAG_02378/CNAG_01736/CNAG_03975/CNAG_04712/CNAG_00775/CNAG_00680/CNAG_04039/CNAG_04574/CNAG_03624/CNAG_03491/CNAG_06102/CNAG_03762/CNAG_03521/CNAG_03284/CNAG_05755/CNAG_07413/CNAG_01810/CNAG_06468	19
GO:0043234	cellular component by up regulated genes	protein complex	5/255	314/2620	1	1	1	CNAG_06345/CNAG_01736/CNAG_00321/CNAG_03491/CNAG_06242	5
GO:0044444	cellular component by up regulated genes	cytoplasmic part	7/255	486/2620	1	1	1	CNAG_06345/CNAG_04712/CNAG_03426/CNAG_04039/CNAG_01812/CNAG_04574/CNAG_06102	7
GO:0000785	cellular component by down regulated genes	chromatin	5/117	14/2620	0.000236223	0.0193703	0.0159139	CNAG_06745/CNAG_06746/CNAG_03723/CNAG_04168/CNAG_06747	5
GO:0000786	cellular component by down regulated genes	nucleosome	4/117	10/2620	0.000644014	0.0202761	0.0166581	CNAG_06745/CNAG_06746/CNAG_04168/CNAG_06747	4
GO:0005743	cellular component by down regulated genes	mitochondrial inner membrane	9/117	58/2620	0.000870414	0.0202761	0.0166581	CNAG_04189/CNAG_05626/CNAG_04264/CNAG_03226/CNAG_02916/CNAG_01667/CNAG_01962/CNAG_01569/CNAG_01323	9
GO:0019866	cellular component by down regulated genes	organelle inner membrane	9/117	59/2620	0.000989077	0.0202761	0.0166581	CNAG_04189/CNAG_05626/CNAG_04264/CNAG_03226/CNAG_02916/CNAG_01667/CNAG_01962/CNAG_01569/CNAG_01323	9
GO:0044815	cellular component by down regulated genes	DNA packaging complex	4/117	12/2620	0.00141573	0.0232179	0.0190751	CNAG_06745/CNAG_06746/CNAG_04168/CNAG_06747	4
GO:0032993	cellular component by down regulated genes	protein-DNA complex	4/117	14/2620	0.00267046	0.0246086	0.0202176	CNAG_06745/CNAG_06746/CNAG_04168/CNAG_06747	4
GO:0044455	cellular component by down regulated genes	mitochondrial membrane part	6/117	33/2620	0.00286939	0.0246086	0.0202176	CNAG_04264/CNAG_02916/CNAG_01667/CNAG_01962/CNAG_01569/CNAG_01323	6
GO:0005739	cellular component by down regulated genes	mitochondrion	15/117	155/2620	0.00310531	0.0246086	0.0202176	CNAG_04189/CNAG_05626/CNAG_04264/CNAG_03226/CNAG_01382/CNAG_02916/CNAG_01120/CNAG_01667/CNAG_01843/CNAG_01962/CNAG_00329/CNAG_05997/CNAG_02007/CNAG_01569/CNAG_01323	15
GO:0031967	cellular component by down regulated genes	organelle envelope	11/117	97/2620	0.00335586	0.0246086	0.0202176	CNAG_04189/CNAG_05626/CNAG_04264/CNAG_03226/CNAG_02916/CNAG_01667/CNAG_01962/CNAG_02007/CNAG_01569/CNAG_01199/CNAG_01323	11
GO:0031975	cellular component by down regulated genes	envelope	11/117	97/2620	0.00335586	0.0246086	0.0202176	CNAG_04189/CNAG_05626/CNAG_04264/CNAG_03226/CNAG_02916/CNAG_01667/CNAG_01962/CNAG_02007/CNAG_01569/CNAG_01199/CNAG_01323	11
GO:1990204	cellular component by down regulated genes	oxidoreductase complex	4/117	15/2620	0.00351726	0.0246086	0.0202176	CNAG_02814/CNAG_01120/CNAG_07356/CNAG_01323	4
GO:0005740	cellular component by down regulated genes	mitochondrial envelope	10/117	84/2620	0.00360127	0.0246086	0.0202176	CNAG_04189/CNAG_05626/CNAG_04264/CNAG_03226/CNAG_02916/CNAG_01667/CNAG_01962/CNAG_02007/CNAG_01569/CNAG_01323	10
GO:0044429	cellular component by down regulated genes	mitochondrial part	11/117	105/2620	0.0062067	0.03915	0.0321643	CNAG_04189/CNAG_05626/CNAG_04264/CNAG_03226/CNAG_02916/CNAG_01120/CNAG_01667/CNAG_01962/CNAG_02007/CNAG_01569/CNAG_01323	11
GO:0031966	cellular component by down regulated genes	mitochondrial membrane	9/117	79/2620	0.00763478	0.044718	0.0367388	CNAG_04189/CNAG_05626/CNAG_04264/CNAG_03226/CNAG_02916/CNAG_01667/CNAG_01962/CNAG_01569/CNAG_01323	9
GO:1902494	cellular component by down regulated genes	catalytic complex	11/117	131/2620	0.0295825	0.161718	0.132862	CNAG_02814/CNAG_06861/CNAG_01120/CNAG_07715/CNAG_03723/CNAG_05792/CNAG_06175/CNAG_07356/CNAG_00482/CNAG_03721/CNAG_01323	11
GO:0098800	cellular component by down regulated genes	inner mitochondrial membrane protein complex	3/117	18/2620	0.0433883	0.213344	0.175276	CNAG_02916/CNAG_01569/CNAG_01323	3
GO:0000502	cellular component by down regulated genes	proteasome complex	4/117	31/2620	0.0468315	0.213344	0.175276	CNAG_05792/CNAG_06175/CNAG_00482/CNAG_03721	4
GO:1905369	cellular component by down regulated genes	endopeptidase complex	4/117	31/2620	0.0468315	0.213344	0.175276	CNAG_05792/CNAG_06175/CNAG_00482/CNAG_03721	4
GO:0031090	cellular component by down regulated genes	organelle membrane	10/117	127/2620	0.0541886	0.233867	0.192137	CNAG_04189/CNAG_05626/CNAG_04264/CNAG_03226/CNAG_02916/CNAG_01667/CNAG_01962/CNAG_01569/CNAG_00148/CNAG_01323	10
GO:0090575	cellular component by down regulated genes	RNA polymerase II transcription factor complex	2/117	10/2620	0.0703809	0.282854	0.232383	CNAG_06861/CNAG_07715	2
GO:1905368	cellular component by down regulated genes	peptidase complex	4/117	36/2620	0.074062	0.282854	0.232383	CNAG_05792/CNAG_06175/CNAG_00482/CNAG_03721	4
GO:0005694	cellular component by down regulated genes	chromosome	6/117	67/2620	0.0758877	0.282854	0.232383	CNAG_06745/CNAG_00740/CNAG_06746/CNAG_03723/CNAG_04168/CNAG_06747	6
GO:0098798	cellular component by down regulated genes	mitochondrial protein complex	3/117	24/2620	0.0888374	0.30942	0.254209	CNAG_02916/CNAG_01569/CNAG_01323	3
GO:0044427	cellular component by down regulated genes	chromosomal part	5/117	54/2620	0.0905619	0.30942	0.254209	CNAG_06745/CNAG_06746/CNAG_03723/CNAG_04168/CNAG_06747	5
GO:0005667	cellular component by down regulated genes	transcription factor complex	2/117	13/2620	0.111914	0.352959	0.289979	CNAG_06861/CNAG_07715	2
GO:0044798	cellular component by down regulated genes	nuclear transcription factor complex	2/117	13/2620	0.111914	0.352959	0.289979	CNAG_06861/CNAG_07715	2
GO:0005829	cellular component by down regulated genes	cytosol	2/117	14/2620	0.126895	0.371621	0.305311	CNAG_05125/CNAG_02007	2
GO:0016591	cellular component by down regulated genes	DNA-directed RNA polymerase II, holoenzyme	2/117	14/2620	0.126895	0.371621	0.305311	CNAG_06861/CNAG_07715	2
GO:0044422	cellular component by down regulated genes	organelle part	25/117	453/2620	0.143222	0.391474	0.321622	CNAG_06745/CNAG_00740/CNAG_06861/CNAG_04189/CNAG_05626/CNAG_04264/CNAG_06746/CNAG_03226/CNAG_02916/CNAG_01120/CNAG_07715/CNAG_01667/CNAG_05776/CNAG_03723/CNAG_05752/CNAG_01962/CNAG_02007/CNAG_06534/CNAG_02577/CNAG_01569/CNAG_01199/CNAG_00148/CNAG_04168/CNAG_01323/CNAG_06747	25
GO:0044446	cellular component by down regulated genes	intracellular organelle part	25/117	453/2620	0.143222	0.391474	0.321622	CNAG_06745/CNAG_00740/CNAG_06861/CNAG_04189/CNAG_05626/CNAG_04264/CNAG_06746/CNAG_03226/CNAG_02916/CNAG_01120/CNAG_07715/CNAG_01667/CNAG_05776/CNAG_03723/CNAG_05752/CNAG_01962/CNAG_02007/CNAG_06534/CNAG_02577/CNAG_01569/CNAG_01199/CNAG_00148/CNAG_04168/CNAG_01323/CNAG_06747	25
GO:0000428	cellular component by down regulated genes	DNA-directed RNA polymerase complex	2/117	16/2620	0.15811	0.392879	0.322776	CNAG_06861/CNAG_07715	2
GO:0030880	cellular component by down regulated genes	RNA polymerase complex	2/117	16/2620	0.15811	0.392879	0.322776	CNAG_06861/CNAG_07715	2
GO:0055029	cellular component by down regulated genes	nuclear DNA-directed RNA polymerase complex	2/117	16/2620	0.15811	0.392879	0.322776	CNAG_06861/CNAG_07715	2
GO:0070469	cellular component by down regulated genes	respiratory chain	2/117	17/2620	0.174212	0.41377	0.339939	CNAG_07356/CNAG_01323	2
GO:0098796	cellular component by down regulated genes	membrane protein complex	6/117	85/2620	0.176609	0.41377	0.339939	CNAG_02916/CNAG_06532/CNAG_05248/CNAG_07356/CNAG_01569/CNAG_01323	6
GO:0043234	cellular component by down regulated genes	protein complex	17/117	314/2620	0.230281	0.52453	0.430936	CNAG_06861/CNAG_01382/CNAG_02916/CNAG_01063/CNAG_07715/CNAG_05776/CNAG_03723/CNAG_05792/CNAG_06532/CNAG_05248/CNAG_06175/CNAG_07356/CNAG_01569/CNAG_01199/CNAG_00482/CNAG_03721/CNAG_01323	17
GO:0044444	cellular component by down regulated genes	cytoplasmic part	25/117	486/2620	0.244156	0.527808	0.433629	CNAG_02814/CNAG_04189/CNAG_03626/CNAG_05626/CNAG_04264/CNAG_05125/CNAG_03226/CNAG_01382/CNAG_02916/CNAG_01120/CNAG_01667/CNAG_05240/CNAG_06532/CNAG_05248/CNAG_01843/CNAG_01962/CNAG_00329/CNAG_05997/CNAG_02007/CNAG_06534/CNAG_02577/CNAG_01569/CNAG_00148/CNAG_04726/CNAG_01323	25
GO:0030117	cellular component by down regulated genes	membrane coat	2/117	22/2620	0.257467	0.527808	0.433629	CNAG_06532/CNAG_05248	2
GO:0048475	cellular component by down regulated genes	coated membrane	2/117	22/2620	0.257467	0.527808	0.433629	CNAG_06532/CNAG_05248	2
GO:0061695	cellular component by down regulated genes	transferase complex, transferring phosphorus-containing groups	2/117	22/2620	0.257467	0.527808	0.433629	CNAG_06861/CNAG_07715	2
GO:0000228	cellular component by down regulated genes	nuclear chromosome	2/117	26/2620	0.324771	0.649542	0.533641	CNAG_00740/CNAG_03723	2
GO:0005643	cellular component by down regulated genes	nuclear pore	1/117	11/2620	0.395595	0.714968	0.587393	CNAG_01199	1
GO:0005635	cellular component by down regulated genes	nuclear envelope	1/117	13/2620	0.448599	0.714968	0.587393	CNAG_01199	1
GO:0005874	cellular component by down regulated genes	microtubule	1/117	13/2620	0.448599	0.714968	0.587393	CNAG_05752	1
GO:0099080	cellular component by down regulated genes	supramolecular complex	1/117	13/2620	0.448599	0.714968	0.587393	CNAG_05752	1
GO:0099081	cellular component by down regulated genes	supramolecular polymer	1/117	13/2620	0.448599	0.714968	0.587393	CNAG_05752	1
GO:0099512	cellular component by down regulated genes	supramolecular fiber	1/117	13/2620	0.448599	0.714968	0.587393	CNAG_05752	1
GO:0099513	cellular component by down regulated genes	polymeric cytoskeletal fiber	1/117	13/2620	0.448599	0.714968	0.587393	CNAG_05752	1
GO:0005839	cellular component by down regulated genes	proteasome core complex	1/117	14/2620	0.473345	0.714968	0.587393	CNAG_05792	1
GO:0045259	cellular component by down regulated genes	proton-transporting ATP synthase complex	1/117	14/2620	0.473345	0.714968	0.587393	CNAG_02916	1
GO:0005794	cellular component by down regulated genes	Golgi apparatus	2/117	36/2620	0.483288	0.714968	0.587393	CNAG_03626/CNAG_00148	2
GO:0031974	cellular component by down regulated genes	membrane-enclosed lumen	6/117	125/2620	0.489634	0.714968	0.587393	CNAG_00740/CNAG_06861/CNAG_01120/CNAG_07715/CNAG_03723/CNAG_02007	6
GO:0043233	cellular component by down regulated genes	organelle lumen	6/117	125/2620	0.489634	0.714968	0.587393	CNAG_00740/CNAG_06861/CNAG_01120/CNAG_07715/CNAG_03723/CNAG_02007	6
GO:0070013	cellular component by down regulated genes	intracellular organelle lumen	6/117	125/2620	0.489634	0.714968	0.587393	CNAG_00740/CNAG_06861/CNAG_01120/CNAG_07715/CNAG_03723/CNAG_02007	6
GO:0031300	cellular component by down regulated genes	intrinsic component of organelle membrane	1/117	15/2620	0.49699	0.714968	0.587393	CNAG_01667	1
GO:0031301	cellular component by down regulated genes	integral component of organelle membrane	1/117	15/2620	0.49699	0.714968	0.587393	CNAG_01667	1
GO:0033177	cellular component by down regulated genes	proton-transporting two-sector ATPase complex, proton-transporting domain	1/117	15/2620	0.49699	0.714968	0.587393	CNAG_02916	1
GO:0000139	cellular component by down regulated genes	Golgi membrane	1/117	18/2620	0.561791	0.794256	0.652534	CNAG_00148	1
GO:0044451	cellular component by down regulated genes	nucleoplasm part	2/117	45/2620	0.605086	0.840966	0.69091	CNAG_06861/CNAG_07715	2
GO:0005759	cellular component by down regulated genes	mitochondrial matrix	1/117	22/2620	0.635489	0.849325	0.697776	CNAG_01120	1
GO:0044454	cellular component by down regulated genes	nuclear chromosome part	1/117	22/2620	0.635489	0.849325	0.697776	CNAG_03723	1
GO:0005654	cellular component by down regulated genes	nucleoplasm	2/117	49/2620	0.65189	0.849325	0.697776	CNAG_06861/CNAG_07715	2
GO:0031981	cellular component by down regulated genes	nuclear lumen	4/117	99/2620	0.654513	0.849325	0.697776	CNAG_00740/CNAG_06861/CNAG_07715/CNAG_03723	4
GO:1990234	cellular component by down regulated genes	transferase complex	2/117	50/2620	0.662888	0.849325	0.697776	CNAG_06861/CNAG_07715	2
GO:0012505	cellular component by down regulated genes	endomembrane system	5/117	129/2620	0.693831	0.85779	0.704731	CNAG_03626/CNAG_06534/CNAG_02577/CNAG_01199/CNAG_00148	5
GO:0044431	cellular component by down regulated genes	Golgi apparatus part	1/117	26/2620	0.696881	0.85779	0.704731	CNAG_00148	1
GO:0016469	cellular component by down regulated genes	proton-transporting two-sector ATPase complex	1/117	27/2620	0.710553	0.85779	0.704731	CNAG_02916	1
GO:0044428	cellular component by down regulated genes	nuclear part	6/117	157/2620	0.714429	0.85779	0.704731	CNAG_00740/CNAG_06861/CNAG_07715/CNAG_05776/CNAG_03723/CNAG_01199	6
GO:0005789	cellular component by down regulated genes	endoplasmic reticulum membrane	2/117	57/2620	0.73226	0.85779	0.704731	CNAG_06534/CNAG_02577	2
GO:0042175	cellular component by down regulated genes	nuclear outer membrane-endoplasmic reticulum membrane network	2/117	57/2620	0.73226	0.85779	0.704731	CNAG_06534/CNAG_02577	2
GO:0044432	cellular component by down regulated genes	endoplasmic reticulum part	2/117	59/2620	0.74974	0.86486	0.71054	CNAG_06534/CNAG_02577	2
GO:0015630	cellular component by down regulated genes	microtubule cytoskeleton	1/117	31/2620	0.75939	0.86486	0.71054	CNAG_05752	1
GO:0071944	cellular component by down regulated genes	cell periphery	1/117	37/2620	0.817739	0.918556	0.754655	CNAG_03465	1
GO:0005783	cellular component by down regulated genes	endoplasmic reticulum	2/117	75/2620	0.857444	0.949334	0.779941	CNAG_06534/CNAG_02577	2
GO:0044430	cellular component by down regulated genes	cytoskeletal part	1/117	44/2620	0.868294	0.949334	0.779941	CNAG_05752	1
GO:0005856	cellular component by down regulated genes	cytoskeleton	1/117	48/2620	0.890652	0.960967	0.789498	CNAG_05752	1
GO:0043228	cellular component by down regulated genes	non-membrane-bounded organelle	8/117	270/2620	0.928812	0.973137	0.799496	CNAG_06745/CNAG_00740/CNAG_06746/CNAG_03723/CNAG_05752/CNAG_04726/CNAG_04168/CNAG_06747	8
GO:0043232	cellular component by down regulated genes	intracellular non-membrane-bounded organelle	8/117	270/2620	0.928812	0.973137	0.799496	CNAG_06745/CNAG_00740/CNAG_06746/CNAG_03723/CNAG_05752/CNAG_04726/CNAG_04168/CNAG_06747	8
GO:0098588	cellular component by down regulated genes	bounding membrane of organelle	1/117	60/2620	0.937534	0.973137	0.799496	CNAG_00148	1
GO:0030529	cellular component by down regulated genes	intracellular ribonucleoprotein complex	4/117	212/2620	0.9889	0.99795	0.819882	CNAG_00781/CNAG_05240/CNAG_03742/CNAG_04726	4
GO:1990904	cellular component by down regulated genes	ribonucleoprotein complex	4/117	212/2620	0.9889	0.99795	0.819882	CNAG_00781/CNAG_05240/CNAG_03742/CNAG_04726	4
GO:0005840	cellular component by down regulated genes	ribosome	1/117	132/2620	0.99795	0.99795	0.819882	CNAG_04726	1
GO:0042254	biological process by up regulated genes	ribosome biogenesis	20/128	48/2183	2.23581e-13	5.70131e-11	5.69543e-11	CNAG_02454/CNAG_05151/CNAG_06766/CNAG_03975/CNAG_00775/CNAG_07657/CNAG_05473/CNAG_00449/CNAG_03724/CNAG_03624/CNAG_04222/CNAG_03789/CNAG_03762/CNAG_03284/CNAG_05597/CNAG_02328/CNAG_07855/CNAG_07413/CNAG_04072/CNAG_06468	20
GO:0022613	biological process by up regulated genes	ribonucleoprotein complex biogenesis	20/128	69/2183	5.48295e-10	6.99076e-08	6.98355e-08	CNAG_02454/CNAG_05151/CNAG_06766/CNAG_03975/CNAG_00775/CNAG_07657/CNAG_05473/CNAG_00449/CNAG_03724/CNAG_03624/CNAG_04222/CNAG_03789/CNAG_03762/CNAG_03284/CNAG_05597/CNAG_02328/CNAG_07855/CNAG_07413/CNAG_04072/CNAG_06468	20
GO:0055085	biological process by up regulated genes	transmembrane transport	34/128	204/2183	3.99667e-09	3.39717e-07	3.39367e-07	CNAG_06345/CNAG_02299/CNAG_01499/CNAG_03719/CNAG_07751/CNAG_03707/CNAG_00028/CNAG_03838/CNAG_01690/CNAG_02600/CNAG_04474/CNAG_03426/CNAG_06323/CNAG_02336/CNAG_01960/CNAG_00815/CNAG_07917/CNAG_00844/CNAG_00529/CNAG_01925/CNAG_04947/CNAG_06102/CNAG_01953/CNAG_03090/CNAG_00003/CNAG_07519/CNAG_00433/CNAG_06186/CNAG_06034/CNAG_01681/CNAG_06758/CNAG_06242/CNAG_07869/CNAG_03474	34
GO:0006364	biological process by up regulated genes	rRNA processing	11/128	28/2183	1.68521e-07	1.07432e-05	1.07322e-05	CNAG_05151/CNAG_06766/CNAG_03975/CNAG_00775/CNAG_05473/CNAG_00449/CNAG_03724/CNAG_03624/CNAG_03762/CNAG_03284/CNAG_05597	11
GO:0016072	biological process by up regulated genes	rRNA metabolic process	11/128	29/2183	2.58092e-07	1.31627e-05	1.31491e-05	CNAG_05151/CNAG_06766/CNAG_03975/CNAG_00775/CNAG_05473/CNAG_00449/CNAG_03724/CNAG_03624/CNAG_03762/CNAG_03284/CNAG_05597	11
GO:0044085	biological process by up regulated genes	cellular component biogenesis	22/128	126/2183	1.64472e-06	6.99005e-05	6.98284e-05	CNAG_06345/CNAG_02454/CNAG_05151/CNAG_06766/CNAG_03975/CNAG_00775/CNAG_07657/CNAG_05473/CNAG_00449/CNAG_04039/CNAG_03724/CNAG_03624/CNAG_04222/CNAG_03789/CNAG_03762/CNAG_03284/CNAG_05597/CNAG_02328/CNAG_07855/CNAG_07413/CNAG_04072/CNAG_06468	22
GO:0006810	biological process by up regulated genes	transport	45/128	438/2183	2.84823e-05	0.000969921	0.00096892	CNAG_06345/CNAG_05277/CNAG_02299/CNAG_01499/CNAG_03719/CNAG_07751/CNAG_03140/CNAG_03707/CNAG_00028/CNAG_04712/CNAG_03838/CNAG_01690/CNAG_02600/CNAG_04474/CNAG_03426/CNAG_06323/CNAG_02336/CNAG_01960/CNAG_00815/CNAG_07917/CNAG_00844/CNAG_05884/CNAG_06292/CNAG_00529/CNAG_04222/CNAG_01925/CNAG_03897/CNAG_04947/CNAG_06102/CNAG_01953/CNAG_03090/CNAG_06932/CNAG_00003/CNAG_07519/CNAG_04311/CNAG_00433/CNA…	45
GO:0034470	biological process by up regulated genes	ncRNA processing	12/128	53/2183	3.3425e-05	0.000969921	0.00096892	CNAG_05151/CNAG_06766/CNAG_03975/CNAG_00775/CNAG_05473/CNAG_00449/CNAG_03481/CNAG_03724/CNAG_03624/CNAG_03762/CNAG_03284/CNAG_05597	12
GO:0051234	biological process by up regulated genes	establishment of localization	45/128	441/2183	3.42325e-05	0.000969921	0.00096892	CNAG_06345/CNAG_05277/CNAG_02299/CNAG_01499/CNAG_03719/CNAG_07751/CNAG_03140/CNAG_03707/CNAG_00028/CNAG_04712/CNAG_03838/CNAG_01690/CNAG_02600/CNAG_04474/CNAG_03426/CNAG_06323/CNAG_02336/CNAG_01960/CNAG_00815/CNAG_07917/CNAG_00844/CNAG_05884/CNAG_06292/CNAG_00529/CNAG_04222/CNAG_01925/CNAG_03897/CNAG_04947/CNAG_06102/CNAG_01953/CNAG_03090/CNAG_06932/CNAG_00003/CNAG_07519/CNAG_04311/CNAG_00433/CNA…	45
GO:0051179	biological process by up regulated genes	localization	45/128	447/2183	4.90802e-05	0.00125155	0.00125025	CNAG_06345/CNAG_05277/CNAG_02299/CNAG_01499/CNAG_03719/CNAG_07751/CNAG_03140/CNAG_03707/CNAG_00028/CNAG_04712/CNAG_03838/CNAG_01690/CNAG_02600/CNAG_04474/CNAG_03426/CNAG_06323/CNAG_02336/CNAG_01960/CNAG_00815/CNAG_07917/CNAG_00844/CNAG_05884/CNAG_06292/CNAG_00529/CNAG_04222/CNAG_01925/CNAG_03897/CNAG_04947/CNAG_06102/CNAG_01953/CNAG_03090/CNAG_06932/CNAG_00003/CNAG_07519/CNAG_04311/CNAG_00433/CNA…	45
GO:0034660	biological process by up regulated genes	ncRNA metabolic process	12/128	85/2183	0.00325656	0.0754929	0.075415	CNAG_05151/CNAG_06766/CNAG_03975/CNAG_00775/CNAG_05473/CNAG_00449/CNAG_03481/CNAG_03724/CNAG_03624/CNAG_03762/CNAG_03284/CNAG_05597	12
GO:0071840	biological process by up regulated genes	cellular component organization or biogenesis	24/128	249/2183	0.00795707	0.169088	0.168913	CNAG_06345/CNAG_02454/CNAG_05151/CNAG_06766/CNAG_03975/CNAG_00775/CNAG_07909/CNAG_07657/CNAG_00680/CNAG_05473/CNAG_00449/CNAG_04039/CNAG_03724/CNAG_03624/CNAG_04222/CNAG_03789/CNAG_03762/CNAG_03284/CNAG_05597/CNAG_02328/CNAG_07855/CNAG_07413/CNAG_04072/CNAG_06468	24
GO:0006396	biological process by up regulated genes	RNA processing	14/128	127/2183	0.0143262	0.281013	0.280723	CNAG_05151/CNAG_06766/CNAG_03975/CNAG_00775/CNAG_05473/CNAG_00449/CNAG_03481/CNAG_03724/CNAG_03624/CNAG_03491/CNAG_03762/CNAG_03284/CNAG_05597/CNAG_03222	14
GO:0050790	biological process by up regulated genes	regulation of catalytic activity	3/128	17/2183	0.0732805	1	0.998968	CNAG_03763/CNAG_02658/CNAG_06929	3
GO:0008643	biological process by up regulated genes	carbohydrate transport	3/128	18/2183	0.0843063	1	0.998968	CNAG_03140/CNAG_06292/CNAG_06932	3
GO:0065009	biological process by up regulated genes	regulation of molecular function	3/128	18/2183	0.0843063	1	0.998968	CNAG_03763/CNAG_02658/CNAG_06929	3
GO:0005975	biological process by up regulated genes	carbohydrate metabolic process	12/128	134/2183	0.0886142	1	0.998968	CNAG_05799/CNAG_06515/CNAG_05653/CNAG_06336/CNAG_05652/CNAG_05803/CNAG_06098/CNAG_05458/CNAG_00897/CNAG_06623/CNAG_05264/CNAG_04874	12
GO:0007154	biological process by up regulated genes	cell communication	9/128	97/2183	0.110833	1	0.998968	CNAG_03763/CNAG_00495/CNAG_06929/CNAG_03876/CNAG_00321/CNAG_05695/CNAG_02523/CNAG_00125/CNAG_02381	9
GO:0007165	biological process by up regulated genes	signal transduction	9/128	97/2183	0.110833	1	0.998968	CNAG_03763/CNAG_00495/CNAG_06929/CNAG_03876/CNAG_00321/CNAG_05695/CNAG_02523/CNAG_00125/CNAG_02381	9
GO:0023052	biological process by up regulated genes	signaling	9/128	97/2183	0.110833	1	0.998968	CNAG_03763/CNAG_00495/CNAG_06929/CNAG_03876/CNAG_00321/CNAG_05695/CNAG_02523/CNAG_00125/CNAG_02381	9
GO:0044700	biological process by up regulated genes	single organism signaling	9/128	97/2183	0.110833	1	0.998968	CNAG_03763/CNAG_00495/CNAG_06929/CNAG_03876/CNAG_00321/CNAG_05695/CNAG_02523/CNAG_00125/CNAG_02381	9
GO:0006555	biological process by up regulated genes	methionine metabolic process	2/128	11/2183	0.132722	1	0.998968	CNAG_04215/CNAG_00165	2
GO:0015931	biological process by up regulated genes	nucleobase-containing compound transport	2/128	11/2183	0.132722	1	0.998968	CNAG_03426/CNAG_04222	2
GO:0032259	biological process by up regulated genes	methylation	2/128	11/2183	0.132722	1	0.998968	CNAG_02317/CNAG_03762	2
GO:0043414	biological process by up regulated genes	macromolecule methylation	2/128	11/2183	0.132722	1	0.998968	CNAG_02317/CNAG_03762	2
GO:0000097	biological process by up regulated genes	sulfur amino acid biosynthetic process	2/128	12/2183	0.1534	1	0.998968	CNAG_04215/CNAG_00165	2
GO:0006066	biological process by up regulated genes	alcohol metabolic process	2/128	13/2183	0.174648	1	0.998968	CNAG_04574/CNAG_06623	2
GO:0022618	biological process by up regulated genes	ribonucleoprotein complex assembly	3/128	27/2183	0.208125	1	0.998968	CNAG_03789/CNAG_07855/CNAG_04072	3
GO:0000096	biological process by up regulated genes	sulfur amino acid metabolic process	2/128	15/2183	0.218325	1	0.998968	CNAG_04215/CNAG_00165	2
GO:0009067	biological process by up regulated genes	aspartate family amino acid biosynthetic process	2/128	15/2183	0.218325	1	0.998968	CNAG_04215/CNAG_00165	2
GO:0071826	biological process by up regulated genes	ribonucleoprotein complex subunit organization	3/128	28/2183	0.223805	1	0.998968	CNAG_03789/CNAG_07855/CNAG_04072	3
GO:0006839	biological process by up regulated genes	mitochondrial transport	2/128	16/2183	0.240521	1	0.998968	CNAG_06345/CNAG_04712	2
GO:1902582	biological process by up regulated genes	single-organism intracellular transport	2/128	16/2183	0.240521	1	0.998968	CNAG_06345/CNAG_03426	2
GO:0007049	biological process by up regulated genes	cell cycle	5/128	58/2183	0.250788	1	0.998968	CNAG_02658/CNAG_01736/CNAG_07909/CNAG_00680/CNAG_05761	5
GO:1902580	biological process by up regulated genes	single-organism cellular localization	2/128	17/2183	0.26282	1	0.998968	CNAG_06345/CNAG_03426	2
GO:0009066	biological process by up regulated genes	aspartate family amino acid metabolic process	2/128	18/2183	0.285134	1	0.998968	CNAG_04215/CNAG_00165	2
GO:0042592	biological process by up regulated genes	homeostatic process	3/128	35/2183	0.337789	1	0.998968	CNAG_01318/CNAG_06917/CNAG_03848	3
GO:1901615	biological process by up regulated genes	organic hydroxy compound metabolic process	2/128	21/2183	0.351434	1	0.998968	CNAG_04574/CNAG_06623	2
GO:0045454	biological process by up regulated genes	cell redox homeostasis	2/128	22/2183	0.373117	1	0.998968	CNAG_06917/CNAG_03848	2
GO:0022402	biological process by up regulated genes	cell cycle process	3/128	39/2183	0.403272	1	0.998968	CNAG_01736/CNAG_07909/CNAG_00680	3
GO:0009451	biological process by up regulated genes	RNA modification	2/128	25/2183	0.436258	1	0.998968	CNAG_02454/CNAG_03762	2
GO:0019725	biological process by up regulated genes	cellular homeostasis	2/128	25/2183	0.436258	1	0.998968	CNAG_06917/CNAG_03848	2
GO:0044262	biological process by up regulated genes	cellular carbohydrate metabolic process	2/128	25/2183	0.436258	1	0.998968	CNAG_05653/CNAG_06623	2
GO:0042278	biological process by up regulated genes	purine nucleoside metabolic process	1/128	10/2183	0.454215	1	0.998968	CNAG_00165	1
GO:0043094	biological process by up regulated genes	cellular metabolic compound salvage	1/128	10/2183	0.454215	1	0.998968	CNAG_00165	1
GO:0043650	biological process by up regulated genes	dicarboxylic acid biosynthetic process	1/128	10/2183	0.454215	1	0.998968	CNAG_04951	1
GO:0044275	biological process by up regulated genes	cellular carbohydrate catabolic process	1/128	10/2183	0.454215	1	0.998968	CNAG_06623	1
GO:0046128	biological process by up regulated genes	purine ribonucleoside metabolic process	1/128	10/2183	0.454215	1	0.998968	CNAG_00165	1
GO:0051338	biological process by up regulated genes	regulation of transferase activity	1/128	10/2183	0.454215	1	0.998968	CNAG_02658	1
GO:0044272	biological process by up regulated genes	sulfur compound biosynthetic process	2/128	26/2183	0.456553	1	0.998968	CNAG_04215/CNAG_00165	2
GO:0000280	biological process by up regulated genes	nuclear division	2/128	27/2183	0.476427	1	0.998968	CNAG_07909/CNAG_00680	2
GO:0016052	biological process by up regulated genes	carbohydrate catabolic process	2/128	27/2183	0.476427	1	0.998968	CNAG_06623/CNAG_05264	2
GO:0006720	biological process by up regulated genes	isoprenoid metabolic process	1/128	11/2183	0.486364	1	0.998968	CNAG_04574	1
GO:0009073	biological process by up regulated genes	aromatic amino acid family biosynthetic process	1/128	11/2183	0.486364	1	0.998968	CNAG_04951	1
GO:0009163	biological process by up regulated genes	nucleoside biosynthetic process	1/128	11/2183	0.486364	1	0.998968	CNAG_00165	1
GO:0030001	biological process by up regulated genes	metal ion transport	1/128	11/2183	0.486364	1	0.998968	CNAG_06242	1
GO:0042398	biological process by up regulated genes	cellular modified amino acid biosynthetic process	1/128	11/2183	0.486364	1	0.998968	CNAG_06645	1
GO:0042455	biological process by up regulated genes	ribonucleoside biosynthetic process	1/128	11/2183	0.486364	1	0.998968	CNAG_00165	1
GO:0044743	biological process by up regulated genes	protein transmembrane import into intracellular organelle	1/128	11/2183	0.486364	1	0.998968	CNAG_06345	1
GO:1901659	biological process by up regulated genes	glycosyl compound biosynthetic process	1/128	11/2183	0.486364	1	0.998968	CNAG_00165	1
GO:0044765	biological process by up regulated genes	single-organism transport	5/128	80/2183	0.509811	1	0.998968	CNAG_06345/CNAG_03140/CNAG_03426/CNAG_06292/CNAG_06932	5
GO:0016071	biological process by up regulated genes	mRNA metabolic process	4/128	63/2183	0.510985	1	0.998968	CNAG_03491/CNAG_03521/CNAG_03222/CNAG_01810	4
GO:0050794	biological process by up regulated genes	regulation of cellular process	14/128	234/2183	0.512202	1	0.998968	CNAG_03763/CNAG_00495/CNAG_02658/CNAG_06929/CNAG_03876/CNAG_00321/CNAG_05695/CNAG_07572/CNAG_02523/CNAG_05597/CNAG_00125/CNAG_02381/CNAG_06917/CNAG_03848	14
GO:0006626	biological process by up regulated genes	protein targeting to mitochondrion	1/128	12/2183	0.516634	1	0.998968	CNAG_06345	1
GO:0009069	biological process by up regulated genes	serine family amino acid metabolic process	1/128	12/2183	0.516634	1	0.998968	CNAG_04215	1
GO:0017038	biological process by up regulated genes	protein import	1/128	12/2183	0.516634	1	0.998968	CNAG_06345	1
GO:0006811	biological process by up regulated genes	ion transport	3/128	48/2183	0.5419	1	0.998968	CNAG_02777/CNAG_06242/CNAG_05075	3
GO:1902578	biological process by up regulated genes	single-organism localization	5/128	83/2183	0.543449	1	0.998968	CNAG_06345/CNAG_03140/CNAG_03426/CNAG_06292/CNAG_06932	5
GO:0018193	biological process by up regulated genes	peptidyl-amino acid modification	1/128	13/2183	0.545133	1	0.998968	CNAG_00762	1
GO:0065002	biological process by up regulated genes	intracellular protein transmembrane transport	1/128	13/2183	0.545133	1	0.998968	CNAG_06345	1
GO:0070585	biological process by up regulated genes	protein localization to mitochondrion	1/128	13/2183	0.545133	1	0.998968	CNAG_06345	1
GO:0071806	biological process by up regulated genes	protein transmembrane transport	1/128	13/2183	0.545133	1	0.998968	CNAG_06345	1
GO:0072655	biological process by up regulated genes	establishment of protein localization to mitochondrion	1/128	13/2183	0.545133	1	0.998968	CNAG_06345	1
GO:0048285	biological process by up regulated genes	organelle fission	2/128	31/2183	0.551356	1	0.998968	CNAG_07909/CNAG_00680	2
GO:0022607	biological process by up regulated genes	cellular component assembly	5/128	84/2183	0.554427	1	0.998968	CNAG_06345/CNAG_04039/CNAG_03789/CNAG_07855/CNAG_04072	5
GO:0016070	biological process by up regulated genes	RNA metabolic process	22/128	379/2183	0.560027	1	0.998968	CNAG_05861/CNAG_02454/CNAG_05151/CNAG_01179/CNAG_07536/CNAG_06611/CNAG_06766/CNAG_03975/CNAG_00775/CNAG_05473/CNAG_07572/CNAG_00449/CNAG_03481/CNAG_03724/CNAG_03624/CNAG_03491/CNAG_03762/CNAG_03521/CNAG_03284/CNAG_05597/CNAG_03222/CNAG_01810	22
GO:0006790	biological process by up regulated genes	sulfur compound metabolic process	3/128	50/2183	0.570197	1	0.998968	CNAG_04215/CNAG_04039/CNAG_00165	3
GO:0051716	biological process by up regulated genes	cellular response to stimulus	12/128	208/2183	0.57137	1	0.998968	CNAG_01913/CNAG_03763/CNAG_00495/CNAG_06929/CNAG_03876/CNAG_00321/CNAG_07909/CNAG_05695/CNAG_02523/CNAG_00419/CNAG_00125/CNAG_02381	12
GO:0044802	biological process by up regulated genes	single-organism membrane organization	1/128	14/2183	0.571963	1	0.998968	CNAG_06345	1
GO:0035556	biological process by up regulated genes	intracellular signal transduction	4/128	68/2183	0.572853	1	0.998968	CNAG_00495/CNAG_00321/CNAG_00125/CNAG_02381	4
GO:0009072	biological process by up regulated genes	aromatic amino acid family metabolic process	1/128	15/2183	0.597223	1	0.998968	CNAG_04951	1
GO:0009119	biological process by up regulated genes	ribonucleoside metabolic process	1/128	15/2183	0.597223	1	0.998968	CNAG_00165	1
GO:0061024	biological process by up regulated genes	membrane organization	1/128	15/2183	0.597223	1	0.998968	CNAG_06345	1
GO:0065008	biological process by up regulated genes	regulation of biological quality	3/128	52/2183	0.597408	1	0.998968	CNAG_01318/CNAG_06917/CNAG_03848	3
GO:0071702	biological process by up regulated genes	organic substance transport	8/128	143/2183	0.611027	1	0.998968	CNAG_06345/CNAG_03140/CNAG_03426/CNAG_05884/CNAG_06292/CNAG_04222/CNAG_03897/CNAG_06932	8
GO:0065003	biological process by up regulated genes	macromolecular complex assembly	4/128	72/2183	0.619111	1	0.998968	CNAG_06345/CNAG_03789/CNAG_07855/CNAG_04072	4
GO:0006081	biological process by up regulated genes	cellular aldehyde metabolic process	1/128	16/2183	0.621004	1	0.998968	CNAG_05653	1
GO:0007266	biological process by up regulated genes	Rho protein signal transduction	1/128	16/2183	0.621004	1	0.998968	CNAG_02381	1
GO:0035023	biological process by up regulated genes	regulation of Rho protein signal transduction	1/128	16/2183	0.621004	1	0.998968	CNAG_02381	1
GO:0050896	biological process by up regulated genes	response to stimulus	13/128	236/2183	0.641671	1	0.998968	CNAG_01913/CNAG_03763/CNAG_00495/CNAG_06929/CNAG_03876/CNAG_00321/CNAG_07909/CNAG_05695/CNAG_02523/CNAG_00419/CNAG_00125/CNAG_02381/CNAG_06346	13
GO:0006099	biological process by up regulated genes	tricarboxylic acid cycle	1/128	17/2183	0.64339	1	0.998968	CNAG_05653	1
GO:0009110	biological process by up regulated genes	vitamin biosynthetic process	1/128	17/2183	0.64339	1	0.998968	CNAG_06009	1
GO:0042364	biological process by up regulated genes	water-soluble vitamin biosynthetic process	1/128	17/2183	0.64339	1	0.998968	CNAG_06009	1
GO:0051301	biological process by up regulated genes	cell division	1/128	17/2183	0.64339	1	0.998968	CNAG_05761	1
GO:0050789	biological process by up regulated genes	regulation of biological process	14/128	256/2183	0.655709	1	0.998968	CNAG_03763/CNAG_00495/CNAG_02658/CNAG_06929/CNAG_03876/CNAG_00321/CNAG_05695/CNAG_07572/CNAG_02523/CNAG_05597/CNAG_00125/CNAG_02381/CNAG_06917/CNAG_03848	14
GO:0043933	biological process by up regulated genes	macromolecular complex subunit organization	4/128	76/2183	0.662165	1	0.998968	CNAG_06345/CNAG_03789/CNAG_07855/CNAG_04072	4
GO:0065007	biological process by up regulated genes	biological regulation	15/128	275/2183	0.663132	1	0.998968	CNAG_03763/CNAG_00495/CNAG_02658/CNAG_06929/CNAG_03876/CNAG_00321/CNAG_05695/CNAG_01318/CNAG_07572/CNAG_02523/CNAG_05597/CNAG_00125/CNAG_02381/CNAG_06917/CNAG_03848	15
GO:0006101	biological process by up regulated genes	citrate metabolic process	1/128	18/2183	0.664464	1	0.998968	CNAG_05653	1
GO:0006766	biological process by up regulated genes	vitamin metabolic process	1/128	18/2183	0.664464	1	0.998968	CNAG_06009	1
GO:0006767	biological process by up regulated genes	water-soluble vitamin metabolic process	1/128	18/2183	0.664464	1	0.998968	CNAG_06009	1
GO:0016579	biological process by up regulated genes	protein deubiquitination	1/128	18/2183	0.664464	1	0.998968	CNAG_00455	1
GO:0044724	biological process by up regulated genes	single-organism carbohydrate catabolic process	1/128	18/2183	0.664464	1	0.998968	CNAG_06623	1
GO:0072350	biological process by up regulated genes	tricarboxylic acid metabolic process	1/128	18/2183	0.664464	1	0.998968	CNAG_05653	1
GO:0072657	biological process by up regulated genes	protein localization to membrane	1/128	18/2183	0.664464	1	0.998968	CNAG_06345	1
GO:0090150	biological process by up regulated genes	establishment of protein localization to membrane	1/128	18/2183	0.664464	1	0.998968	CNAG_06345	1
GO:0009060	biological process by up regulated genes	aerobic respiration	1/128	19/2183	0.684302	1	0.998968	CNAG_05653	1
GO:0030029	biological process by up regulated genes	actin filament-based process	1/128	19/2183	0.684302	1	0.998968	CNAG_04222	1
GO:0030036	biological process by up regulated genes	actin cytoskeleton organization	1/128	19/2183	0.684302	1	0.998968	CNAG_04222	1
GO:0051726	biological process by up regulated genes	regulation of cell cycle	1/128	19/2183	0.684302	1	0.998968	CNAG_02658	1
GO:0008652	biological process by up regulated genes	cellular amino acid biosynthetic process	3/128	60/2183	0.694716	1	0.998968	CNAG_04951/CNAG_04215/CNAG_00165	3
GO:0006575	biological process by up regulated genes	cellular modified amino acid metabolic process	1/128	20/2183	0.702975	1	0.998968	CNAG_06645	1
GO:0043648	biological process by up regulated genes	dicarboxylic acid metabolic process	1/128	20/2183	0.702975	1	0.998968	CNAG_04951	1
GO:0070646	biological process by up regulated genes	protein modification by small protein removal	1/128	20/2183	0.702975	1	0.998968	CNAG_00455	1
GO:0016053	biological process by up regulated genes	organic acid biosynthetic process	4/128	82/2183	0.720417	1	0.998968	CNAG_04951/CNAG_06645/CNAG_04215/CNAG_00165	4
GO:0046394	biological process by up regulated genes	carboxylic acid biosynthetic process	4/128	82/2183	0.720417	1	0.998968	CNAG_04951/CNAG_06645/CNAG_04215/CNAG_00165	4
GO:0043412	biological process by up regulated genes	macromolecule modification	7/128	139/2183	0.720549	1	0.998968	CNAG_02454/CNAG_02658/CNAG_02317/CNAG_04997/CNAG_03762/CNAG_00762/CNAG_00455	7
GO:0007265	biological process by up regulated genes	Ras protein signal transduction	1/128	21/2183	0.720552	1	0.998968	CNAG_02381	1
GO:0046578	biological process by up regulated genes	regulation of Ras protein signal transduction	1/128	21/2183	0.720552	1	0.998968	CNAG_02381	1
GO:0009116	biological process by up regulated genes	nucleoside metabolic process	1/128	22/2183	0.737097	1	0.998968	CNAG_00165	1
GO:0051056	biological process by up regulated genes	regulation of small GTPase mediated signal transduction	1/128	22/2183	0.737097	1	0.998968	CNAG_02381	1
GO:0098813	biological process by up regulated genes	nuclear chromosome segregation	1/128	22/2183	0.737097	1	0.998968	CNAG_01736	1
GO:1901657	biological process by up regulated genes	glycosyl compound metabolic process	1/128	22/2183	0.737097	1	0.998968	CNAG_00165	1
GO:1902531	biological process by up regulated genes	regulation of intracellular signal transduction	1/128	22/2183	0.737097	1	0.998968	CNAG_02381	1
GO:0007067	biological process by up regulated genes	mitotic nuclear division	1/128	23/2183	0.752669	1	0.998968	CNAG_00680	1
GO:0007264	biological process by up regulated genes	small GTPase mediated signal transduction	2/128	46/2183	0.763309	1	0.998968	CNAG_00495/CNAG_02381	2
GO:0007059	biological process by up regulated genes	chromosome segregation	1/128	24/2183	0.767326	1	0.998968	CNAG_01736	1
GO:0009966	biological process by up regulated genes	regulation of signal transduction	1/128	24/2183	0.767326	1	0.998968	CNAG_02381	1
GO:0010646	biological process by up regulated genes	regulation of cell communication	1/128	24/2183	0.767326	1	0.998968	CNAG_02381	1
GO:0023051	biological process by up regulated genes	regulation of signaling	1/128	24/2183	0.767326	1	0.998968	CNAG_02381	1
GO:0032268	biological process by up regulated genes	regulation of cellular protein metabolic process	1/128	24/2183	0.767326	1	0.998968	CNAG_02658	1
GO:0048583	biological process by up regulated genes	regulation of response to stimulus	1/128	24/2183	0.767326	1	0.998968	CNAG_02381	1
GO:0044283	biological process by up regulated genes	small molecule biosynthetic process	5/128	108/2183	0.772329	1	0.998968	CNAG_04951/CNAG_06645/CNAG_04215/CNAG_06009/CNAG_00165	5
GO:0034622	biological process by up regulated genes	cellular macromolecular complex assembly	3/128	68/2183	0.773376	1	0.998968	CNAG_03789/CNAG_07855/CNAG_04072	3
GO:0044723	biological process by up regulated genes	single-organism carbohydrate metabolic process	2/128	47/2183	0.773796	1	0.998968	CNAG_05653/CNAG_06623	2
GO:0006464	biological process by up regulated genes	cellular protein modification process	5/128	110/2183	0.786189	1	0.998968	CNAG_02658/CNAG_02317/CNAG_04997/CNAG_00762/CNAG_00455	5
GO:0036211	biological process by up regulated genes	protein modification process	5/128	110/2183	0.786189	1	0.998968	CNAG_02658/CNAG_02317/CNAG_04997/CNAG_00762/CNAG_00455	5
GO:1901607	biological process by up regulated genes	alpha-amino acid biosynthetic process	2/128	49/2183	0.793568	1	0.998968	CNAG_04215/CNAG_00165	2
GO:0006397	biological process by up regulated genes	mRNA processing	2/128	50/2183	0.802875	1	0.998968	CNAG_03491/CNAG_03222	2
GO:0000278	biological process by up regulated genes	mitotic cell cycle	1/128	27/2183	0.806321	1	0.998968	CNAG_00680	1
GO:0008033	biological process by up regulated genes	tRNA processing	1/128	27/2183	0.806321	1	0.998968	CNAG_03481	1
GO:0051246	biological process by up regulated genes	regulation of protein metabolic process	1/128	27/2183	0.806321	1	0.998968	CNAG_02658	1
GO:1903047	biological process by up regulated genes	mitotic cell cycle process	1/128	27/2183	0.806321	1	0.998968	CNAG_00680	1
GO:0006310	biological process by up regulated genes	DNA recombination	1/128	28/2183	0.81782	1	0.998968	CNAG_07909	1
GO:0007010	biological process by up regulated genes	cytoskeleton organization	1/128	28/2183	0.81782	1	0.998968	CNAG_04222	1
GO:0006996	biological process by up regulated genes	organelle organization	7/128	155/2183	0.81925	1	0.998968	CNAG_06345/CNAG_07909/CNAG_00680/CNAG_04222/CNAG_03789/CNAG_07855/CNAG_04072	7
GO:1902589	biological process by up regulated genes	single-organism organelle organization	2/128	53/2183	0.828614	1	0.998968	CNAG_06345/CNAG_04222	2
GO:0007005	biological process by up regulated genes	mitochondrion organization	1/128	29/2183	0.828641	1	0.998968	CNAG_06345	1
GO:0070647	biological process by up regulated genes	protein modification by small protein conjugation or removal	1/128	29/2183	0.828641	1	0.998968	CNAG_00455	1
GO:0034220	biological process by up regulated genes	ion transmembrane transport	1/128	30/2183	0.838823	1	0.998968	CNAG_06242	1
GO:0098655	biological process by up regulated genes	cation transmembrane transport	1/128	30/2183	0.838823	1	0.998968	CNAG_06242	1
GO:0098660	biological process by up regulated genes	inorganic ion transmembrane transport	1/128	30/2183	0.838823	1	0.998968	CNAG_06242	1
GO:0098662	biological process by up regulated genes	inorganic cation transmembrane transport	1/128	30/2183	0.838823	1	0.998968	CNAG_06242	1
GO:0006629	biological process by up regulated genes	lipid metabolic process	4/128	99/2183	0.844987	1	0.998968	CNAG_03822/CNAG_04574/CNAG_01601/CNAG_05003	4
GO:0072594	biological process by up regulated genes	establishment of protein localization to organelle	1/128	31/2183	0.848406	1	0.998968	CNAG_06345	1
GO:0071705	biological process by up regulated genes	nitrogen compound transport	5/128	122/2183	0.856126	1	0.998968	CNAG_06345/CNAG_03426/CNAG_05884/CNAG_04222/CNAG_03897	5
GO:0006605	biological process by up regulated genes	protein targeting	1/128	32/2183	0.857423	1	0.998968	CNAG_06345	1
GO:0044282	biological process by up regulated genes	small molecule catabolic process	1/128	32/2183	0.857423	1	0.998968	CNAG_06623	1
GO:0045333	biological process by up regulated genes	cellular respiration	1/128	32/2183	0.857423	1	0.998968	CNAG_05653	1
GO:0046907	biological process by up regulated genes	intracellular transport	4/128	104/2183	0.871393	1	0.998968	CNAG_06345/CNAG_03426/CNAG_05884/CNAG_04222	4
GO:0033365	biological process by up regulated genes	protein localization to organelle	1/128	34/2183	0.87389	1	0.998968	CNAG_06345	1
GO:0051649	biological process by up regulated genes	establishment of localization in cell	4/128	105/2183	0.876189	1	0.998968	CNAG_06345/CNAG_03426/CNAG_05884/CNAG_04222	4
GO:0051188	biological process by up regulated genes	cofactor biosynthetic process	2/128	60/2183	0.87735	1	0.998968	CNAG_06645/CNAG_04039	2
GO:0015980	biological process by up regulated genes	energy derivation by oxidation of organic compounds	1/128	35/2183	0.881402	1	0.998968	CNAG_05653	1
GO:0016310	biological process by up regulated genes	phosphorylation	1/128	35/2183	0.881402	1	0.998968	CNAG_02658	1
GO:0006355	biological process by up regulated genes	regulation of transcription, DNA-templated	2/128	61/2183	0.883173	1	0.998968	CNAG_07572/CNAG_05597	2
GO:0051252	biological process by up regulated genes	regulation of RNA metabolic process	2/128	61/2183	0.883173	1	0.998968	CNAG_07572/CNAG_05597	2
GO:1903506	biological process by up regulated genes	regulation of nucleic acid-templated transcription	2/128	61/2183	0.883173	1	0.998968	CNAG_07572/CNAG_05597	2
GO:2001141	biological process by up regulated genes	regulation of RNA biosynthetic process	2/128	61/2183	0.883173	1	0.998968	CNAG_07572/CNAG_05597	2
GO:0006511	biological process by up regulated genes	ubiquitin-dependent protein catabolic process	1/128	36/2183	0.888469	1	0.998968	CNAG_00455	1
GO:0006461	biological process by up regulated genes	protein complex assembly	1/128	37/2183	0.895118	1	0.998968	CNAG_06345	1
GO:0019941	biological process by up regulated genes	modification-dependent protein catabolic process	1/128	37/2183	0.895118	1	0.998968	CNAG_00455	1
GO:0070271	biological process by up regulated genes	protein complex biogenesis	1/128	37/2183	0.895118	1	0.998968	CNAG_06345	1
GO:0006886	biological process by up regulated genes	intracellular protein transport	3/128	87/2183	0.895707	1	0.998968	CNAG_06345/CNAG_05884/CNAG_04222	3
GO:0019219	biological process by up regulated genes	regulation of nucleobase-containing compound metabolic process	2/128	64/2183	0.899155	1	0.998968	CNAG_07572/CNAG_05597	2
GO:0043632	biological process by up regulated genes	modification-dependent macromolecule catabolic process	1/128	38/2183	0.901374	1	0.998968	CNAG_00455	1
GO:0072522	biological process by up regulated genes	purine-containing compound biosynthetic process	1/128	38/2183	0.901374	1	0.998968	CNAG_00165	1
GO:0009108	biological process by up regulated genes	coenzyme biosynthetic process	1/128	39/2183	0.907259	1	0.998968	CNAG_06645	1
GO:0071822	biological process by up regulated genes	protein complex subunit organization	1/128	39/2183	0.907259	1	0.998968	CNAG_06345	1
GO:0051641	biological process by up regulated genes	cellular localization	4/128	114/2183	0.912866	1	0.998968	CNAG_06345/CNAG_03426/CNAG_05884/CNAG_04222	4
GO:0006351	biological process by up regulated genes	transcription, DNA-templated	8/128	200/2183	0.915198	1	0.998968	CNAG_05861/CNAG_01179/CNAG_07536/CNAG_06611/CNAG_07572/CNAG_03521/CNAG_05597/CNAG_01810	8
GO:0032774	biological process by up regulated genes	RNA biosynthetic process	8/128	200/2183	0.915198	1	0.998968	CNAG_05861/CNAG_01179/CNAG_07536/CNAG_06611/CNAG_07572/CNAG_03521/CNAG_05597/CNAG_01810	8
GO:0097659	biological process by up regulated genes	nucleic acid-templated transcription	8/128	200/2183	0.915198	1	0.998968	CNAG_05861/CNAG_01179/CNAG_07536/CNAG_06611/CNAG_07572/CNAG_03521/CNAG_05597/CNAG_01810	8
GO:0031323	biological process by up regulated genes	regulation of cellular metabolic process	3/128	92/2183	0.9161	1	0.998968	CNAG_02658/CNAG_07572/CNAG_05597	3
GO:0080090	biological process by up regulated genes	regulation of primary metabolic process	3/128	92/2183	0.9161	1	0.998968	CNAG_02658/CNAG_07572/CNAG_05597	3
GO:0015031	biological process by up regulated genes	protein transport	4/128	115/2183	0.916284	1	0.998968	CNAG_06345/CNAG_05884/CNAG_04222/CNAG_03897	4
GO:0015833	biological process by up regulated genes	peptide transport	4/128	115/2183	0.916284	1	0.998968	CNAG_06345/CNAG_05884/CNAG_04222/CNAG_03897	4
GO:0042886	biological process by up regulated genes	amide transport	4/128	115/2183	0.916284	1	0.998968	CNAG_06345/CNAG_05884/CNAG_04222/CNAG_03897	4
GO:0006644	biological process by up regulated genes	phospholipid metabolic process	1/128	41/2183	0.918005	1	0.998968	CNAG_03822	1
GO:0006812	biological process by up regulated genes	cation transport	1/128	41/2183	0.918005	1	0.998968	CNAG_06242	1
GO:0034613	biological process by up regulated genes	cellular protein localization	3/128	95/2183	0.926538	1	0.998968	CNAG_06345/CNAG_05884/CNAG_04222	3
GO:0070727	biological process by up regulated genes	cellular macromolecule localization	3/128	95/2183	0.926538	1	0.998968	CNAG_06345/CNAG_05884/CNAG_04222	3
GO:0044257	biological process by up regulated genes	cellular protein catabolic process	1/128	43/2183	0.927514	1	0.998968	CNAG_00455	1
GO:0051603	biological process by up regulated genes	proteolysis involved in cellular protein catabolic process	1/128	43/2183	0.927514	1	0.998968	CNAG_00455	1
GO:0044255	biological process by up regulated genes	cellular lipid metabolic process	2/128	71/2183	0.928906	1	0.998968	CNAG_03822/CNAG_04574	2
GO:0045184	biological process by up regulated genes	establishment of protein localization	4/128	120/2183	0.931657	1	0.998968	CNAG_06345/CNAG_05884/CNAG_04222/CNAG_03897	4
GO:0006281	biological process by up regulated genes	DNA repair	3/128	97/2183	0.932827	1	0.998968	CNAG_01913/CNAG_07909/CNAG_00419	3
GO:0016043	biological process by up regulated genes	cellular component organization	8/128	208/2183	0.934598	1	0.998968	CNAG_06345/CNAG_07909/CNAG_00680/CNAG_04039/CNAG_04222/CNAG_03789/CNAG_07855/CNAG_04072	8
GO:0006457	biological process by up regulated genes	protein folding	1/128	45/2183	0.935927	1	0.998968	CNAG_02484	1
GO:0008104	biological process by up regulated genes	protein localization	4/128	122/2183	0.937064	1	0.998968	CNAG_06345/CNAG_05884/CNAG_04222/CNAG_03897	4
GO:1901605	biological process by up regulated genes	alpha-amino acid metabolic process	2/128	75/2183	0.94199	1	0.998968	CNAG_04215/CNAG_00165	2
GO:0032787	biological process by up regulated genes	monocarboxylic acid metabolic process	1/128	47/2183	0.943371	1	0.998968	CNAG_05653	1
GO:0006091	biological process by up regulated genes	generation of precursor metabolites and energy	1/128	48/2183	0.946765	1	0.998968	CNAG_05653	1
GO:0006974	biological process by up regulated genes	cellular response to DNA damage stimulus	3/128	103/2183	0.948859	1	0.998968	CNAG_01913/CNAG_07909/CNAG_00419	3
GO:0033036	biological process by up regulated genes	macromolecule localization	4/128	128/2183	0.951055	1	0.998968	CNAG_06345/CNAG_05884/CNAG_04222/CNAG_03897	4
GO:0010556	biological process by up regulated genes	regulation of macromolecule biosynthetic process	2/128	79/2183	0.95278	1	0.998968	CNAG_07572/CNAG_05597	2
GO:0051171	biological process by up regulated genes	regulation of nitrogen compound metabolic process	2/128	79/2183	0.95278	1	0.998968	CNAG_07572/CNAG_05597	2
GO:2000112	biological process by up regulated genes	regulation of cellular macromolecule biosynthetic process	2/128	79/2183	0.95278	1	0.998968	CNAG_07572/CNAG_05597	2
GO:0009889	biological process by up regulated genes	regulation of biosynthetic process	2/128	80/2183	0.955164	1	0.998968	CNAG_07572/CNAG_05597	2
GO:0031326	biological process by up regulated genes	regulation of cellular biosynthetic process	2/128	80/2183	0.955164	1	0.998968	CNAG_07572/CNAG_05597	2
GO:0060255	biological process by up regulated genes	regulation of macromolecule metabolic process	3/128	107/2183	0.957501	1	0.998968	CNAG_02658/CNAG_07572/CNAG_05597	3
GO:0030163	biological process by up regulated genes	protein catabolic process	1/128	53/2183	0.960933	1	0.998968	CNAG_00455	1
GO:0033554	biological process by up regulated genes	cellular response to stress	3/128	111/2183	0.964772	1	0.998968	CNAG_01913/CNAG_07909/CNAG_00419	3
GO:0055114	biological process by up regulated genes	oxidation-reduction process	1/128	55/2183	0.965488	1	0.998968	CNAG_05653	1
GO:0006520	biological process by up regulated genes	cellular amino acid metabolic process	4/128	137/2183	0.9668	1	0.998968	CNAG_04951/CNAG_06913/CNAG_04215/CNAG_00165	4
GO:0019222	biological process by up regulated genes	regulation of metabolic process	3/128	113/2183	0.967955	1	0.998968	CNAG_02658/CNAG_07572/CNAG_05597	3
GO:0006950	biological process by up regulated genes	response to stress	4/128	138/2183	0.968226	1	0.998968	CNAG_01913/CNAG_07909/CNAG_00419/CNAG_06346	4
GO:0006399	biological process by up regulated genes	tRNA metabolic process	1/128	58/2183	0.971351	1	0.998968	CNAG_03481	1
GO:0044712	biological process by up regulated genes	single-organism catabolic process	1/128	58/2183	0.971351	1	0.998968	CNAG_06623	1
GO:0051186	biological process by up regulated genes	cofactor metabolic process	2/128	89/2183	0.972041	1	0.998968	CNAG_06645/CNAG_04039	2
GO:0010468	biological process by up regulated genes	regulation of gene expression	2/128	93/2183	0.977408	1	0.998968	CNAG_07572/CNAG_05597	2
GO:0006508	biological process by up regulated genes	proteolysis	1/128	62/2183	0.977659	1	0.998968	CNAG_00455	1
GO:0044265	biological process by up regulated genes	cellular macromolecule catabolic process	1/128	64/2183	0.980275	1	0.998968	CNAG_00455	1
GO:0006732	biological process by up regulated genes	coenzyme metabolic process	1/128	66/2183	0.982586	1	0.998968	CNAG_06645	1
GO:0019438	biological process by up regulated genes	aromatic compound biosynthetic process	11/128	311/2183	0.983185	1	0.998968	CNAG_05861/CNAG_01179/CNAG_07536/CNAG_04951/CNAG_06611/CNAG_06645/CNAG_07572/CNAG_03521/CNAG_05597/CNAG_01810/CNAG_00165	11
GO:0034654	biological process by up regulated genes	nucleobase-containing compound biosynthetic process	9/128	268/2183	0.983207	1	0.998968	CNAG_05861/CNAG_01179/CNAG_07536/CNAG_06611/CNAG_07572/CNAG_03521/CNAG_05597/CNAG_01810/CNAG_00165	9
GO:1901362	biological process by up regulated genes	organic cyclic compound biosynthetic process	12/128	333/2183	0.98371	1	0.998968	CNAG_05861/CNAG_01179/CNAG_07536/CNAG_04951/CNAG_06611/CNAG_06645/CNAG_07572/CNAG_03521/CNAG_05597/CNAG_06009/CNAG_01810/CNAG_00165	12
GO:0019752	biological process by up regulated genes	carboxylic acid metabolic process	6/128	202/2183	0.984259	1	0.998968	CNAG_04951/CNAG_05653/CNAG_06645/CNAG_06913/CNAG_04215/CNAG_00165	6
GO:0043436	biological process by up regulated genes	oxoacid metabolic process	6/128	202/2183	0.984259	1	0.998968	CNAG_04951/CNAG_05653/CNAG_06645/CNAG_06913/CNAG_04215/CNAG_00165	6
GO:0072521	biological process by up regulated genes	purine-containing compound metabolic process	1/128	68/2183	0.984629	1	0.998968	CNAG_00165	1
GO:0006082	biological process by up regulated genes	organic acid metabolic process	6/128	205/2183	0.986116	1	0.998968	CNAG_04951/CNAG_05653/CNAG_06645/CNAG_06913/CNAG_04215/CNAG_00165	6
GO:0018130	biological process by up regulated genes	heterocycle biosynthetic process	11/128	318/2183	0.9869	1	0.998968	CNAG_05861/CNAG_01179/CNAG_07536/CNAG_06611/CNAG_06645/CNAG_07572/CNAG_03521/CNAG_05597/CNAG_06009/CNAG_01810/CNAG_00165	11
GO:0009057	biological process by up regulated genes	macromolecule catabolic process	1/128	79/2183	0.992278	1	0.998968	CNAG_00455	1
GO:0016192	biological process by up regulated genes	vesicle-mediated transport	1/128	80/2183	0.992748	1	0.998968	CNAG_05277	1
GO:0006259	biological process by up regulated genes	DNA metabolic process	3/128	144/2183	0.993101	1	0.998968	CNAG_01913/CNAG_07909/CNAG_00419	3
GO:1901137	biological process by up regulated genes	carbohydrate derivative biosynthetic process	1/128	82/2183	0.993604	1	0.998968	CNAG_00165	1
GO:1901575	biological process by up regulated genes	organic substance catabolic process	3/128	147/2183	0.99409	1	0.998968	CNAG_00455/CNAG_06623/CNAG_05264	3
GO:0044248	biological process by up regulated genes	cellular catabolic process	2/128	130/2183	0.997087	1	0.998968	CNAG_00455/CNAG_06623	2
GO:0009056	biological process by up regulated genes	catabolic process	3/128	165/2183	0.997707	1	0.998968	CNAG_00455/CNAG_06623/CNAG_05264	3
GO:1901135	biological process by up regulated genes	carbohydrate derivative metabolic process	2/128	137/2183	0.998049	1	0.998968	CNAG_06098/CNAG_00165	2
GO:0044711	biological process by up regulated genes	single-organism biosynthetic process	5/128	227/2183	0.998373	1	0.998968	CNAG_04951/CNAG_06645/CNAG_04215/CNAG_06009/CNAG_00165	5
GO:0055086	biological process by up regulated genes	nucleobase-containing small molecule metabolic process	1/128	113/2183	0.999102	1	0.998968	CNAG_00165	1
GO:0044281	biological process by up regulated genes	small molecule metabolic process	9/128	346/2183	0.999347	1	0.998968	CNAG_04951/CNAG_05653/CNAG_06645/CNAG_06913/CNAG_04215/CNAG_04574/CNAG_06009/CNAG_06623/CNAG_00165	9
GO:0006796	biological process by up regulated genes	phosphate-containing compound metabolic process	2/128	162/2183	0.999547	1	0.998968	CNAG_02658/CNAG_03822	2
GO:0006793	biological process by up regulated genes	phosphorus metabolic process	2/128	170/2183	0.999719	1	0.998968	CNAG_02658/CNAG_03822	2
GO:0019637	biological process by up regulated genes	organophosphate metabolic process	1/128	150/2183	0.999917	1	0.998968	CNAG_03822	1
GO:0044710	biological process by up regulated genes	single-organism metabolic process	12/128	482/2183	0.99997	1	0.998968	CNAG_04951/CNAG_05653/CNAG_06645/CNAG_06913/CNAG_03822/CNAG_04215/CNAG_04574/CNAG_01601/CNAG_06009/CNAG_05003/CNAG_06623/CNAG_00165	12
GO:0044267	biological process by up regulated genes	cellular protein metabolic process	5/128	319/2183	0.999988	1	0.998968	CNAG_02658/CNAG_02317/CNAG_04997/CNAG_00762/CNAG_00455	5
GO:0043604	biological process by up regulated genes	amide biosynthetic process	1/128	183/2183	0.99999	1	0.998968	CNAG_06645	1
GO:0044271	biological process by up regulated genes	cellular nitrogen compound biosynthetic process	11/128	487/2183	0.999993	1	0.998968	CNAG_05861/CNAG_01179/CNAG_07536/CNAG_06611/CNAG_06645/CNAG_07572/CNAG_03521/CNAG_05597/CNAG_06009/CNAG_01810/CNAG_00165	11
GO:0019538	biological process by up regulated genes	protein metabolic process	5/128	337/2183	0.999996	1	0.998968	CNAG_02658/CNAG_02317/CNAG_04997/CNAG_00762/CNAG_00455	5
GO:1901566	biological process by up regulated genes	organonitrogen compound biosynthetic process	5/128	338/2183	0.999996	1	0.998968	CNAG_04951/CNAG_06645/CNAG_04215/CNAG_06009/CNAG_00165	5
GO:0043603	biological process by up regulated genes	cellular amide metabolic process	1/128	198/2183	0.999996	1	0.998968	CNAG_06645	1
GO:0034645	biological process by up regulated genes	cellular macromolecule biosynthetic process	8/128	452/2183	0.999999	1	0.998968	CNAG_05861/CNAG_01179/CNAG_07536/CNAG_06611/CNAG_07572/CNAG_03521/CNAG_05597/CNAG_01810	8
GO:0009059	biological process by up regulated genes	macromolecule biosynthetic process	8/128	456/2183	0.999999	1	0.998968	CNAG_05861/CNAG_01179/CNAG_07536/CNAG_06611/CNAG_07572/CNAG_03521/CNAG_05597/CNAG_01810	8
GO:1901564	biological process by up regulated genes	organonitrogen compound metabolic process	6/128	436/2183	1	1	0.998968	CNAG_04951/CNAG_06645/CNAG_06913/CNAG_04215/CNAG_06009/CNAG_00165	6
GO:0006732	biological process by down regulated genes	coenzyme metabolic process	13/121	66/2183	4.0849e-05	0.0123008	0.0115095	CNAG_05059/CNAG_04523/CNAG_04264/CNAG_05125/CNAG_01667/CNAG_01962/CNAG_06534/CNAG_07660/CNAG_03245/CNAG_06432/CNAG_06770/CNAG_00760/CNAG_01395	13
GO:0051186	biological process by down regulated genes	cofactor metabolic process	15/121	89/2183	7.00901e-05	0.0123008	0.0115095	CNAG_02460/CNAG_05059/CNAG_04523/CNAG_04264/CNAG_05125/CNAG_05809/CNAG_01667/CNAG_01962/CNAG_06534/CNAG_07660/CNAG_03245/CNAG_06432/CNAG_06770/CNAG_00760/CNAG_01395	15
GO:0032787	biological process by down regulated genes	monocarboxylic acid metabolic process	10/121	47/2183	0.000170159	0.0199086	0.0186279	CNAG_05059/CNAG_06672/CNAG_04523/CNAG_01120/CNAG_04467/CNAG_02100/CNAG_07660/CNAG_02577/CNAG_05759/CNAG_06770	10
GO:0006790	biological process by down regulated genes	sulfur compound metabolic process	10/121	50/2183	0.000292776	0.0256911	0.0240385	CNAG_03128/CNAG_05059/CNAG_02888/CNAG_05125/CNAG_07660/CNAG_01026/CNAG_06432/CNAG_00760/CNAG_03592/CNAG_07354	10
GO:0006090	biological process by down regulated genes	pyruvate metabolic process	5/121	14/2183	0.000644209	0.0415068	0.0388368	CNAG_05059/CNAG_04523/CNAG_01120/CNAG_07660/CNAG_06770	5
GO:0008610	biological process by down regulated genes	lipid biosynthetic process	10/121	56/2183	0.000763587	0.0415068	0.0388368	CNAG_00519/CNAG_01737/CNAG_05125/CNAG_02896/CNAG_01539/CNAG_01667/CNAG_02100/CNAG_06534/CNAG_02577/CNAG_05759	10
GO:0006629	biological process by down regulated genes	lipid metabolic process	14/121	99/2183	0.000827771	0.0415068	0.0388368	CNAG_01044/CNAG_00519/CNAG_01737/CNAG_05125/CNAG_02896/CNAG_01539/CNAG_01667/CNAG_07638/CNAG_02100/CNAG_06534/CNAG_07744/CNAG_02577/CNAG_05759/CNAG_07354	14
GO:0044710	biological process by down regulated genes	single-organism metabolic process	41/121	482/2183	0.0014366	0.0510433	0.0477598	CNAG_04326/CNAG_05059/CNAG_01044/CNAG_06672/CNAG_04523/CNAG_00519/CNAG_01737/CNAG_04189/CNAG_04264/CNAG_05125/CNAG_03226/CNAG_01382/CNAG_05809/CNAG_02896/CNAG_02916/CNAG_01120/CNAG_01539/CNAG_01667/CNAG_04467/CNAG_01962/CNAG_04879/CNAG_04896/CNAG_05997/CNAG_02007/CNAG_07638/CNAG_02100/CNAG_06534/CNAG_07660/CNAG_07744/CNAG_00061/CNAG_02577/CNAG_05759/CNAG_03245/CNAG_07356/CNAG_06432/CNAG_06770/CNA…	41
GO:0044255	biological process by down regulated genes	cellular lipid metabolic process	11/121	71/2183	0.00143677	0.0510433	0.0477598	CNAG_01044/CNAG_05125/CNAG_02896/CNAG_01539/CNAG_01667/CNAG_02100/CNAG_06534/CNAG_07744/CNAG_02577/CNAG_05759/CNAG_07354	11
GO:0008299	biological process by down regulated genes	isoprenoid biosynthetic process	4/121	10/2183	0.00145422	0.0510433	0.0477598	CNAG_05125/CNAG_02896/CNAG_01667/CNAG_06534	4
GO:0006720	biological process by down regulated genes	isoprenoid metabolic process	4/121	11/2183	0.00218796	0.0698157	0.0653247	CNAG_05125/CNAG_02896/CNAG_01667/CNAG_06534	4
GO:0006733	biological process by down regulated genes	oxidoreduction coenzyme metabolic process	7/121	35/2183	0.00247717	0.0724572	0.0677962	CNAG_04523/CNAG_04264/CNAG_01667/CNAG_01962/CNAG_03245/CNAG_06770/CNAG_01395	7
GO:0006091	biological process by down regulated genes	generation of precursor metabolites and energy	8/121	48/2183	0.00409874	0.110666	0.103547	CNAG_04523/CNAG_04189/CNAG_03226/CNAG_04879/CNAG_00061/CNAG_07356/CNAG_06770/CNAG_01323	8
GO:0044281	biological process by down regulated genes	small molecule metabolic process	30/121	346/2183	0.00586269	0.137203	0.128377	CNAG_04326/CNAG_05059/CNAG_06672/CNAG_04523/CNAG_04189/CNAG_04264/CNAG_03226/CNAG_01382/CNAG_02916/CNAG_01120/CNAG_01539/CNAG_01667/CNAG_04467/CNAG_01962/CNAG_04896/CNAG_02007/CNAG_02100/CNAG_06534/CNAG_07660/CNAG_00061/CNAG_02577/CNAG_05759/CNAG_03245/CNAG_07356/CNAG_06432/CNAG_06770/CNAG_00760/CNAG_03592/CNAG_01323/CNAG_01395	30
GO:1901575	biological process by down regulated genes	organic substance catabolic process	16/121	147/2183	0.00586336	0.137203	0.128377	CNAG_03128/CNAG_00781/CNAG_06672/CNAG_04523/CNAG_00122/CNAG_02888/CNAG_05792/CNAG_04467/CNAG_02175/CNAG_04879/CNAG_04656/CNAG_06175/CNAG_01026/CNAG_03872/CNAG_00482/CNAG_06770	16
GO:0015980	biological process by down regulated genes	energy derivation by oxidation of organic compounds	6/121	35/2183	0.0110472	0.242349	0.226759	CNAG_04189/CNAG_03226/CNAG_04879/CNAG_00061/CNAG_07356/CNAG_01323	6
GO:0006099	biological process by down regulated genes	tricarboxylic acid cycle	4/121	17/2183	0.0121747	0.251371	0.235201	CNAG_04189/CNAG_03226/CNAG_00061/CNAG_07356	4
GO:0006633	biological process by down regulated genes	fatty acid biosynthetic process	3/121	10/2183	0.0149661	0.253704	0.237384	CNAG_02100/CNAG_02577/CNAG_05759	3
GO:0006101	biological process by down regulated genes	citrate metabolic process	4/121	18/2183	0.0149949	0.253704	0.237384	CNAG_04189/CNAG_03226/CNAG_00061/CNAG_07356	4
GO:0072350	biological process by down regulated genes	tricarboxylic acid metabolic process	4/121	18/2183	0.0149949	0.253704	0.237384	CNAG_04189/CNAG_03226/CNAG_00061/CNAG_07356	4
GO:0006082	biological process by down regulated genes	organic acid metabolic process	19/121	205/2183	0.0152886	0.253704	0.237384	CNAG_04326/CNAG_05059/CNAG_06672/CNAG_04523/CNAG_04189/CNAG_03226/CNAG_01382/CNAG_01120/CNAG_04467/CNAG_04896/CNAG_02100/CNAG_07660/CNAG_00061/CNAG_02577/CNAG_05759/CNAG_07356/CNAG_06432/CNAG_06770/CNAG_00760	19
GO:0051188	biological process by down regulated genes	cofactor biosynthetic process	8/121	60/2183	0.0159017	0.253704	0.237384	CNAG_02460/CNAG_05059/CNAG_04264/CNAG_05809/CNAG_01667/CNAG_01962/CNAG_07660/CNAG_06432	8
GO:0009056	biological process by down regulated genes	catabolic process	16/121	165/2183	0.0173194	0.260159	0.243424	CNAG_03128/CNAG_00781/CNAG_06672/CNAG_04523/CNAG_00122/CNAG_02888/CNAG_05792/CNAG_04467/CNAG_02175/CNAG_04879/CNAG_04656/CNAG_06175/CNAG_01026/CNAG_03872/CNAG_00482/CNAG_06770	16
GO:0009060	biological process by down regulated genes	aerobic respiration	4/121	19/2183	0.0181964	0.260159	0.243424	CNAG_04189/CNAG_03226/CNAG_00061/CNAG_07356	4
GO:0009108	biological process by down regulated genes	coenzyme biosynthetic process	6/121	39/2183	0.0185298	0.260159	0.243424	CNAG_05059/CNAG_04264/CNAG_01667/CNAG_01962/CNAG_07660/CNAG_06432	6
GO:0006575	biological process by down regulated genes	cellular modified amino acid metabolic process	4/121	20/2183	0.0217925	0.279191	0.261231	CNAG_03128/CNAG_02888/CNAG_01026/CNAG_00760	4
GO:0006793	biological process by down regulated genes	phosphorus metabolic process	16/121	170/2183	0.0224941	0.279191	0.261231	CNAG_05059/CNAG_04523/CNAG_02814/CNAG_05125/CNAG_02916/CNAG_01539/CNAG_02007/CNAG_06534/CNAG_07660/CNAG_07744/CNAG_03245/CNAG_06432/CNAG_06770/CNAG_01323/CNAG_01395/CNAG_07354	16
GO:0009135	biological process by down regulated genes	purine nucleoside diphosphate metabolic process	3/121	12/2183	0.0252964	0.279191	0.261231	CNAG_04523/CNAG_02007/CNAG_06770	3
GO:0009179	biological process by down regulated genes	purine ribonucleoside diphosphate metabolic process	3/121	12/2183	0.0252964	0.279191	0.261231	CNAG_04523/CNAG_02007/CNAG_06770	3
GO:0009185	biological process by down regulated genes	ribonucleoside diphosphate metabolic process	3/121	12/2183	0.0252964	0.279191	0.261231	CNAG_04523/CNAG_02007/CNAG_06770	3
GO:0046031	biological process by down regulated genes	ADP metabolic process	3/121	12/2183	0.0252964	0.279191	0.261231	CNAG_04523/CNAG_02007/CNAG_06770	3
GO:0019752	biological process by down regulated genes	carboxylic acid metabolic process	18/121	202/2183	0.0262487	0.279191	0.261231	CNAG_04326/CNAG_05059/CNAG_06672/CNAG_04523/CNAG_04189/CNAG_03226/CNAG_01382/CNAG_01120/CNAG_04467/CNAG_04896/CNAG_02100/CNAG_07660/CNAG_00061/CNAG_02577/CNAG_05759/CNAG_07356/CNAG_06770/CNAG_00760	18
GO:0043436	biological process by down regulated genes	oxoacid metabolic process	18/121	202/2183	0.0262487	0.279191	0.261231	CNAG_04326/CNAG_05059/CNAG_06672/CNAG_04523/CNAG_04189/CNAG_03226/CNAG_01382/CNAG_01120/CNAG_04467/CNAG_04896/CNAG_02100/CNAG_07660/CNAG_00061/CNAG_02577/CNAG_05759/CNAG_07356/CNAG_06770/CNAG_00760	18
GO:0045333	biological process by down regulated genes	cellular respiration	5/121	32/2183	0.0290749	0.298824	0.279601	CNAG_04189/CNAG_03226/CNAG_00061/CNAG_07356/CNAG_01323	5
GO:0055114	biological process by down regulated genes	oxidation-reduction process	7/121	55/2183	0.0297972	0.298824	0.279601	CNAG_04189/CNAG_03226/CNAG_04879/CNAG_05997/CNAG_00061/CNAG_07356/CNAG_01323	7
GO:0006631	biological process by down regulated genes	fatty acid metabolic process	3/121	13/2183	0.0315813	0.299596	0.280324	CNAG_02100/CNAG_02577/CNAG_05759	3
GO:0009132	biological process by down regulated genes	nucleoside diphosphate metabolic process	3/121	13/2183	0.0315813	0.299596	0.280324	CNAG_04523/CNAG_02007/CNAG_06770	3
GO:0019693	biological process by down regulated genes	ribose phosphate metabolic process	8/121	69/2183	0.0342757	0.3166	0.296234	CNAG_04523/CNAG_02916/CNAG_02007/CNAG_06534/CNAG_03245/CNAG_06770/CNAG_01323/CNAG_01395	8
GO:0016310	biological process by down regulated genes	phosphorylation	5/121	35/2183	0.0410868	0.369781	0.345994	CNAG_04523/CNAG_07744/CNAG_06770/CNAG_01323/CNAG_07354	5
GO:0044272	biological process by down regulated genes	sulfur compound biosynthetic process	4/121	26/2183	0.0521066	0.446347	0.417634	CNAG_05059/CNAG_07660/CNAG_06432/CNAG_03592	4
GO:0044248	biological process by down regulated genes	cellular catabolic process	12/121	130/2183	0.0521373	0.446347	0.417634	CNAG_03128/CNAG_00781/CNAG_06672/CNAG_02888/CNAG_05792/CNAG_04467/CNAG_02175/CNAG_04879/CNAG_04656/CNAG_01026/CNAG_03872/CNAG_00482	12
GO:0016052	biological process by down regulated genes	carbohydrate catabolic process	4/121	27/2183	0.0586408	0.478672	0.447881	CNAG_04523/CNAG_00122/CNAG_04879/CNAG_06770	4
GO:1901565	biological process by down regulated genes	organonitrogen compound catabolic process	4/121	27/2183	0.0586408	0.478672	0.447881	CNAG_03128/CNAG_02888/CNAG_04467/CNAG_01026	4
GO:0072330	biological process by down regulated genes	monocarboxylic acid biosynthetic process	3/121	17/2183	0.0639433	0.497698	0.465682	CNAG_02100/CNAG_02577/CNAG_05759	3
GO:0046034	biological process by down regulated genes	ATP metabolic process	5/121	40/2183	0.0669554	0.497698	0.465682	CNAG_04523/CNAG_02916/CNAG_02007/CNAG_06770/CNAG_01323	5
GO:0019637	biological process by down regulated genes	organophosphate metabolic process	13/121	150/2183	0.0671505	0.497698	0.465682	CNAG_04523/CNAG_02814/CNAG_05125/CNAG_02916/CNAG_01539/CNAG_02007/CNAG_06534/CNAG_07744/CNAG_03245/CNAG_06770/CNAG_01323/CNAG_01395/CNAG_07354	13
GO:0009057	biological process by down regulated genes	macromolecule catabolic process	8/121	79/2183	0.0675577	0.497698	0.465682	CNAG_00781/CNAG_05792/CNAG_02175/CNAG_04879/CNAG_04656/CNAG_06175/CNAG_03872/CNAG_00482	8
GO:0044711	biological process by down regulated genes	single-organism biosynthetic process	18/121	227/2183	0.0707397	0.497698	0.465682	CNAG_05059/CNAG_00519/CNAG_01737/CNAG_04264/CNAG_05125/CNAG_05809/CNAG_02896/CNAG_02916/CNAG_01539/CNAG_01667/CNAG_01962/CNAG_02007/CNAG_02100/CNAG_06534/CNAG_07660/CNAG_02577/CNAG_05759/CNAG_03592	18
GO:0019362	biological process by down regulated genes	pyridine nucleotide metabolic process	4/121	29/2183	0.0729563	0.497698	0.465682	CNAG_04523/CNAG_03245/CNAG_06770/CNAG_01395	4
GO:0046496	biological process by down regulated genes	nicotinamide nucleotide metabolic process	4/121	29/2183	0.0729563	0.497698	0.465682	CNAG_04523/CNAG_03245/CNAG_06770/CNAG_01395	4
GO:0008643	biological process by down regulated genes	carbohydrate transport	3/121	18/2183	0.073733	0.497698	0.465682	CNAG_06290/CNAG_06963/CNAG_05662	3
GO:0044724	biological process by down regulated genes	single-organism carbohydrate catabolic process	3/121	18/2183	0.073733	0.497698	0.465682	CNAG_04523/CNAG_04879/CNAG_06770	3
GO:0009144	biological process by down regulated genes	purine nucleoside triphosphate metabolic process	5/121	43/2183	0.0860018	0.559011	0.523052	CNAG_04523/CNAG_02916/CNAG_02007/CNAG_06770/CNAG_01323	5
GO:0009205	biological process by down regulated genes	purine ribonucleoside triphosphate metabolic process	5/121	43/2183	0.0860018	0.559011	0.523052	CNAG_04523/CNAG_02916/CNAG_02007/CNAG_06770/CNAG_01323	5
GO:0009150	biological process by down regulated genes	purine ribonucleotide metabolic process	6/121	57/2183	0.0921919	0.58304	0.545535	CNAG_04523/CNAG_02916/CNAG_02007/CNAG_06534/CNAG_06770/CNAG_01323	6
GO:0010629	biological process by down regulated genes	negative regulation of gene expression	3/121	20/2183	0.0951497	0.58304	0.545535	CNAG_00781/CNAG_02175/CNAG_03742	3
GO:0009199	biological process by down regulated genes	ribonucleoside triphosphate metabolic process	5/121	45/2183	0.100125	0.58304	0.545535	CNAG_04523/CNAG_02916/CNAG_02007/CNAG_06770/CNAG_01323	5
GO:0006096	biological process by down regulated genes	glycolytic process	2/121	10/2183	0.102467	0.58304	0.545535	CNAG_04523/CNAG_06770	2
GO:0006165	biological process by down regulated genes	nucleoside diphosphate phosphorylation	2/121	10/2183	0.102467	0.58304	0.545535	CNAG_04523/CNAG_06770	2
GO:0006757	biological process by down regulated genes	ATP generation from ADP	2/121	10/2183	0.102467	0.58304	0.545535	CNAG_04523/CNAG_06770	2
GO:0046939	biological process by down regulated genes	nucleotide phosphorylation	2/121	10/2183	0.102467	0.58304	0.545535	CNAG_04523/CNAG_06770	2
GO:0006163	biological process by down regulated genes	purine nucleotide metabolic process	6/121	59/2183	0.104798	0.58304	0.545535	CNAG_04523/CNAG_02916/CNAG_02007/CNAG_06534/CNAG_06770/CNAG_01323	6
GO:0072524	biological process by down regulated genes	pyridine-containing compound metabolic process	4/121	33/2183	0.106344	0.58304	0.545535	CNAG_04523/CNAG_03245/CNAG_06770/CNAG_01395	4
GO:0010605	biological process by down regulated genes	negative regulation of macromolecule metabolic process	3/121	21/2183	0.106709	0.58304	0.545535	CNAG_00781/CNAG_02175/CNAG_03742	3
GO:0006796	biological process by down regulated genes	phosphate-containing compound metabolic process	13/121	162/2183	0.10797	0.58304	0.545535	CNAG_04523/CNAG_02814/CNAG_05125/CNAG_02916/CNAG_01539/CNAG_02007/CNAG_06534/CNAG_07744/CNAG_03245/CNAG_06770/CNAG_01323/CNAG_01395/CNAG_07354	13
GO:0044723	biological process by down regulated genes	single-organism carbohydrate metabolic process	5/121	47/2183	0.115343	0.597425	0.558994	CNAG_04523/CNAG_01539/CNAG_04879/CNAG_03245/CNAG_06770	5
GO:0005975	biological process by down regulated genes	carbohydrate metabolic process	11/121	134/2183	0.118458	0.597425	0.558994	CNAG_04523/CNAG_00122/CNAG_06923/CNAG_04245/CNAG_01539/CNAG_01230/CNAG_06924/CNAG_04879/CNAG_03245/CNAG_00057/CNAG_06770	11
GO:0009892	biological process by down regulated genes	negative regulation of metabolic process	3/121	22/2183	0.118788	0.597425	0.558994	CNAG_00781/CNAG_02175/CNAG_03742	3
GO:0006338	biological process by down regulated genes	chromatin remodeling	2/121	11/2183	0.120847	0.597425	0.558994	CNAG_00740/CNAG_03723	2
GO:0006739	biological process by down regulated genes	NADP metabolic process	2/121	11/2183	0.120847	0.597425	0.558994	CNAG_03245/CNAG_01395	2
GO:0006779	biological process by down regulated genes	porphyrin-containing compound biosynthetic process	2/121	11/2183	0.120847	0.597425	0.558994	CNAG_02460/CNAG_05809	2
GO:0009141	biological process by down regulated genes	nucleoside triphosphate metabolic process	5/121	48/2183	0.123346	0.601314	0.562633	CNAG_04523/CNAG_02916/CNAG_02007/CNAG_06770/CNAG_01323	5
GO:0009259	biological process by down regulated genes	ribonucleotide metabolic process	6/121	62/2183	0.125305	0.602495	0.563738	CNAG_04523/CNAG_02916/CNAG_02007/CNAG_06534/CNAG_06770/CNAG_01323	6
GO:0006511	biological process by down regulated genes	ubiquitin-dependent protein catabolic process	4/121	36/2183	0.135179	0.632639	0.591943	CNAG_05792/CNAG_04656/CNAG_03872/CNAG_00482	4
GO:0048519	biological process by down regulated genes	negative regulation of biological process	4/121	36/2183	0.135179	0.632639	0.591943	CNAG_00781/CNAG_04824/CNAG_02175/CNAG_03742	4
GO:0006778	biological process by down regulated genes	porphyrin-containing compound metabolic process	2/121	12/2183	0.139957	0.638162	0.59711	CNAG_02460/CNAG_05809	2
GO:0044265	biological process by down regulated genes	cellular macromolecule catabolic process	6/121	64/2183	0.139996	0.638162	0.59711	CNAG_00781/CNAG_05792/CNAG_02175/CNAG_04656/CNAG_03872/CNAG_00482	6
GO:0006325	biological process by down regulated genes	chromatin organization	4/121	37/2183	0.145438	0.644987	0.603497	CNAG_00740/CNAG_03723/CNAG_05782/CNAG_04168	4
GO:0019941	biological process by down regulated genes	modification-dependent protein catabolic process	4/121	37/2183	0.145438	0.644987	0.603497	CNAG_05792/CNAG_04656/CNAG_03872/CNAG_00482	4
GO:0009126	biological process by down regulated genes	purine nucleoside monophosphate metabolic process	5/121	51/2183	0.148843	0.644987	0.603497	CNAG_04523/CNAG_02916/CNAG_02007/CNAG_06770/CNAG_01323	5
GO:0009167	biological process by down regulated genes	purine ribonucleoside monophosphate metabolic process	5/121	51/2183	0.148843	0.644987	0.603497	CNAG_04523/CNAG_02916/CNAG_02007/CNAG_06770/CNAG_01323	5
GO:0043632	biological process by down regulated genes	modification-dependent macromolecule catabolic process	4/121	38/2183	0.155993	0.659308	0.616896	CNAG_05792/CNAG_04656/CNAG_03872/CNAG_00482	4
GO:0000956	biological process by down regulated genes	nuclear-transcribed mRNA catabolic process	2/121	13/2183	0.159661	0.659308	0.616896	CNAG_00781/CNAG_02175	2
GO:0030258	biological process by down regulated genes	lipid modification	2/121	13/2183	0.159661	0.659308	0.616896	CNAG_07744/CNAG_07354	2
GO:0033014	biological process by down regulated genes	tetrapyrrole biosynthetic process	2/121	13/2183	0.159661	0.659308	0.616896	CNAG_02460/CNAG_05809	2
GO:0030163	biological process by down regulated genes	protein catabolic process	5/121	53/2183	0.166994	0.678695	0.635036	CNAG_05792/CNAG_04656/CNAG_06175/CNAG_03872/CNAG_00482	5
GO:0072521	biological process by down regulated genes	purine-containing compound metabolic process	6/121	68/2183	0.171642	0.678695	0.635036	CNAG_04523/CNAG_02916/CNAG_02007/CNAG_06534/CNAG_06770/CNAG_01323	6
GO:0006753	biological process by down regulated genes	nucleoside phosphate metabolic process	8/121	98/2183	0.172091	0.678695	0.635036	CNAG_04523/CNAG_02916/CNAG_02007/CNAG_06534/CNAG_03245/CNAG_06770/CNAG_01323/CNAG_01395	8
GO:0009117	biological process by down regulated genes	nucleotide metabolic process	8/121	98/2183	0.172091	0.678695	0.635036	CNAG_04523/CNAG_02916/CNAG_02007/CNAG_06534/CNAG_03245/CNAG_06770/CNAG_01323/CNAG_01395	8
GO:0006402	biological process by down regulated genes	mRNA catabolic process	2/121	14/2183	0.179837	0.693659	0.649037	CNAG_00781/CNAG_02175	2
GO:0033013	biological process by down regulated genes	tetrapyrrole metabolic process	2/121	14/2183	0.179837	0.693659	0.649037	CNAG_02460/CNAG_05809	2
GO:0006644	biological process by down regulated genes	phospholipid metabolic process	4/121	41/2183	0.189266	0.722089	0.675639	CNAG_05125/CNAG_01539/CNAG_07744/CNAG_07354	4
GO:0006979	biological process by down regulated genes	response to oxidative stress	2/121	15/2183	0.200373	0.756248	0.7076	CNAG_02692/CNAG_05256	2
GO:0009161	biological process by down regulated genes	ribonucleoside monophosphate metabolic process	5/121	57/2183	0.205719	0.768162	0.718748	CNAG_04523/CNAG_02916/CNAG_02007/CNAG_06770/CNAG_01323	5
GO:0044257	biological process by down regulated genes	cellular protein catabolic process	4/121	43/2183	0.212612	0.768615	0.719172	CNAG_05792/CNAG_04656/CNAG_03872/CNAG_00482	4
GO:0051603	biological process by down regulated genes	proteolysis involved in cellular protein catabolic process	4/121	43/2183	0.212612	0.768615	0.719172	CNAG_05792/CNAG_04656/CNAG_03872/CNAG_00482	4
GO:0009123	biological process by down regulated genes	nucleoside monophosphate metabolic process	5/121	58/2183	0.215844	0.768615	0.719172	CNAG_04523/CNAG_02916/CNAG_02007/CNAG_06770/CNAG_01323	5
GO:0044712	biological process by down regulated genes	single-organism catabolic process	5/121	58/2183	0.215844	0.768615	0.719172	CNAG_06672/CNAG_04523/CNAG_04467/CNAG_04879/CNAG_06770	5
GO:0006081	biological process by down regulated genes	cellular aldehyde metabolic process	2/121	16/2183	0.221169	0.768615	0.719172	CNAG_03245/CNAG_01395	2
GO:0007266	biological process by down regulated genes	Rho protein signal transduction	2/121	16/2183	0.221169	0.768615	0.719172	CNAG_04119/CNAG_00547	2
GO:0035023	biological process by down regulated genes	regulation of Rho protein signal transduction	2/121	16/2183	0.221169	0.768615	0.719172	CNAG_04119/CNAG_00547	2
GO:0022900	biological process by down regulated genes	electron transport chain	2/121	17/2183	0.242132	0.833219	0.77962	CNAG_04189/CNAG_01323	2
GO:0044283	biological process by down regulated genes	small molecule biosynthetic process	8/121	108/2183	0.246199	0.83899	0.78502	CNAG_04264/CNAG_01539/CNAG_01667/CNAG_01962/CNAG_02100/CNAG_02577/CNAG_05759/CNAG_03592	8
GO:0006508	biological process by down regulated genes	proteolysis	5/121	62/2183	0.257801	0.870078	0.814108	CNAG_05792/CNAG_04656/CNAG_03872/CNAG_00482/CNAG_03721	5
GO:0019318	biological process by down regulated genes	hexose metabolic process	2/121	18/2183	0.263182	0.879779	0.823185	CNAG_04523/CNAG_03245	2
GO:0006352	biological process by down regulated genes	DNA-templated transcription, initiation	2/121	19/2183	0.284245	0.932019	0.872065	CNAG_06861/CNAG_07715	2
GO:0006401	biological process by down regulated genes	RNA catabolic process	2/121	19/2183	0.284245	0.932019	0.872065	CNAG_00781/CNAG_02175	2
GO:0055086	biological process by down regulated genes	nucleobase-containing small molecule metabolic process	8/121	113/2183	0.286775	0.932019	0.872065	CNAG_04523/CNAG_02916/CNAG_02007/CNAG_06534/CNAG_03245/CNAG_06770/CNAG_01323/CNAG_01395	8
GO:0051276	biological process by down regulated genes	chromosome organization	5/121	66/2183	0.301554	0.956648	0.89511	CNAG_00740/CNAG_04824/CNAG_03723/CNAG_05782/CNAG_04168	5
GO:0005996	biological process by down regulated genes	monosaccharide metabolic process	2/121	20/2183	0.305255	0.956648	0.89511	CNAG_04523/CNAG_03245	2
GO:0016054	biological process by down regulated genes	organic acid catabolic process	2/121	20/2183	0.305255	0.956648	0.89511	CNAG_06672/CNAG_04467	2
GO:0046395	biological process by down regulated genes	carboxylic acid catabolic process	2/121	20/2183	0.305255	0.956648	0.89511	CNAG_06672/CNAG_04467	2
GO:0007265	biological process by down regulated genes	Ras protein signal transduction	2/121	21/2183	0.326155	0.985069	0.921702	CNAG_04119/CNAG_00547	2
GO:0046578	biological process by down regulated genes	regulation of Ras protein signal transduction	2/121	21/2183	0.326155	0.985069	0.921702	CNAG_04119/CNAG_00547	2
GO:1901615	biological process by down regulated genes	organic hydroxy compound metabolic process	2/121	21/2183	0.326155	0.985069	0.921702	CNAG_05125/CNAG_01539	2
GO:0006461	biological process by down regulated genes	protein complex assembly	3/121	37/2183	0.337393	0.985069	0.921702	CNAG_05626/CNAG_01818/CNAG_00148	3
GO:0070271	biological process by down regulated genes	protein complex biogenesis	3/121	37/2183	0.337393	0.985069	0.921702	CNAG_05626/CNAG_01818/CNAG_00148	3
GO:0045454	biological process by down regulated genes	cell redox homeostasis	2/121	22/2183	0.346892	0.985069	0.921702	CNAG_05626/CNAG_07491	2
GO:0046488	biological process by down regulated genes	phosphatidylinositol metabolic process	2/121	22/2183	0.346892	0.985069	0.921702	CNAG_07744/CNAG_07354	2
GO:0051056	biological process by down regulated genes	regulation of small GTPase mediated signal transduction	2/121	22/2183	0.346892	0.985069	0.921702	CNAG_04119/CNAG_00547	2
GO:1902531	biological process by down regulated genes	regulation of intracellular signal transduction	2/121	22/2183	0.346892	0.985069	0.921702	CNAG_04119/CNAG_00547	2
GO:1901135	biological process by down regulated genes	carbohydrate derivative metabolic process	9/121	137/2183	0.347071	0.985069	0.921702	CNAG_04523/CNAG_02814/CNAG_02916/CNAG_02007/CNAG_06534/CNAG_03245/CNAG_06770/CNAG_01323/CNAG_01395	9
GO:0071822	biological process by down regulated genes	protein complex subunit organization	3/121	39/2183	0.368451	0.985069	0.921702	CNAG_05626/CNAG_01818/CNAG_00148	3
GO:0060255	biological process by down regulated genes	regulation of macromolecule metabolic process	7/121	107/2183	0.381668	0.985069	0.921702	CNAG_00781/CNAG_02175/CNAG_05782/CNAG_06175/CNAG_03191/CNAG_03742/CNAG_06744	7
GO:0009966	biological process by down regulated genes	regulation of signal transduction	2/121	24/2183	0.387698	0.985069	0.921702	CNAG_04119/CNAG_00547	2
GO:0010646	biological process by down regulated genes	regulation of cell communication	2/121	24/2183	0.387698	0.985069	0.921702	CNAG_04119/CNAG_00547	2
GO:0023051	biological process by down regulated genes	regulation of signaling	2/121	24/2183	0.387698	0.985069	0.921702	CNAG_04119/CNAG_00547	2
GO:0048583	biological process by down regulated genes	regulation of response to stimulus	2/121	24/2183	0.387698	0.985069	0.921702	CNAG_04119/CNAG_00547	2
GO:0019725	biological process by down regulated genes	cellular homeostasis	2/121	25/2183	0.407692	0.985069	0.921702	CNAG_05626/CNAG_07491	2
GO:0044262	biological process by down regulated genes	cellular carbohydrate metabolic process	2/121	25/2183	0.407692	0.985069	0.921702	CNAG_01539/CNAG_04879	2
GO:0048193	biological process by down regulated genes	Golgi vesicle transport	2/121	25/2183	0.407692	0.985069	0.921702	CNAG_05559/CNAG_00148	2
GO:0000075	biological process by down regulated genes	cell cycle checkpoint	1/121	10/2183	0.435294	0.985069	0.921702	CNAG_04824	1
GO:0006119	biological process by down regulated genes	oxidative phosphorylation	1/121	10/2183	0.435294	0.985069	0.921702	CNAG_01323	1
GO:0044275	biological process by down regulated genes	cellular carbohydrate catabolic process	1/121	10/2183	0.435294	0.985069	0.921702	CNAG_04879	1
GO:0045047	biological process by down regulated genes	protein targeting to ER	1/121	10/2183	0.435294	0.985069	0.921702	CNAG_05240	1
GO:0045786	biological process by down regulated genes	negative regulation of cell cycle	1/121	10/2183	0.435294	0.985069	0.921702	CNAG_04824	1
GO:0051338	biological process by down regulated genes	regulation of transferase activity	1/121	10/2183	0.435294	0.985069	0.921702	CNAG_03191	1
GO:0071824	biological process by down regulated genes	protein-DNA complex subunit organization	1/121	10/2183	0.435294	0.985069	0.921702	CNAG_04168	1
GO:0072599	biological process by down regulated genes	establishment of protein localization to endoplasmic reticulum	1/121	10/2183	0.435294	0.985069	0.921702	CNAG_05240	1
GO:0019222	biological process by down regulated genes	regulation of metabolic process	7/121	113/2183	0.437988	0.985069	0.921702	CNAG_00781/CNAG_02175/CNAG_05782/CNAG_06175/CNAG_03191/CNAG_03742/CNAG_06744	7
GO:0051246	biological process by down regulated genes	regulation of protein metabolic process	2/121	27/2183	0.446708	0.985069	0.921702	CNAG_06175/CNAG_03191	2
GO:0016192	biological process by down regulated genes	vesicle-mediated transport	5/121	80/2183	0.459113	0.985069	0.921702	CNAG_06532/CNAG_05248/CNAG_06376/CNAG_05559/CNAG_00148	5
GO:0044765	biological process by down regulated genes	single-organism transport	5/121	80/2183	0.459113	0.985069	0.921702	CNAG_06290/CNAG_06963/CNAG_05662/CNAG_02916/CNAG_01569	5
GO:0008654	biological process by down regulated genes	phospholipid biosynthetic process	2/121	28/2183	0.46568	0.985069	0.921702	CNAG_05125/CNAG_01539	2
GO:0034655	biological process by down regulated genes	nucleobase-containing compound catabolic process	2/121	28/2183	0.46568	0.985069	0.921702	CNAG_00781/CNAG_02175	2
GO:0016071	biological process by down regulated genes	mRNA metabolic process	4/121	63/2183	0.466076	0.985069	0.921702	CNAG_00781/CNAG_03761/CNAG_05776/CNAG_02175	4
GO:0006555	biological process by down regulated genes	methionine metabolic process	1/121	11/2183	0.466739	0.985069	0.921702	CNAG_00760	1
GO:0016051	biological process by down regulated genes	carbohydrate biosynthetic process	1/121	11/2183	0.466739	0.985069	0.921702	CNAG_01539	1
GO:0030001	biological process by down regulated genes	metal ion transport	1/121	11/2183	0.466739	0.985069	0.921702	CNAG_05626	1
GO:0044743	biological process by down regulated genes	protein transmembrane import into intracellular organelle	1/121	11/2183	0.466739	0.985069	0.921702	CNAG_01569	1
GO:0046148	biological process by down regulated genes	pigment biosynthetic process	1/121	11/2183	0.466739	0.985069	0.921702	CNAG_05809	1
GO:0070972	biological process by down regulated genes	protein localization to endoplasmic reticulum	1/121	11/2183	0.466739	0.985069	0.921702	CNAG_05240	1
GO:0009127	biological process by down regulated genes	purine nucleoside monophosphate biosynthetic process	2/121	29/2183	0.484268	0.985069	0.921702	CNAG_02916/CNAG_02007	2
GO:0009168	biological process by down regulated genes	purine ribonucleoside monophosphate biosynthetic process	2/121	29/2183	0.484268	0.985069	0.921702	CNAG_02916/CNAG_02007	2
GO:0070647	biological process by down regulated genes	protein modification by small protein conjugation or removal	2/121	29/2183	0.484268	0.985069	0.921702	CNAG_03191/CNAG_03872	2
GO:1902578	biological process by down regulated genes	single-organism localization	5/121	83/2183	0.492116	0.985069	0.921702	CNAG_06290/CNAG_06963/CNAG_05662/CNAG_02916/CNAG_01569	5
GO:0006626	biological process by down regulated genes	protein targeting to mitochondrion	1/121	12/2183	0.496446	0.985069	0.921702	CNAG_01569	1
GO:0006928	biological process by down regulated genes	movement of cell or subcellular component	1/121	12/2183	0.496446	0.985069	0.921702	CNAG_05752	1
GO:0007018	biological process by down regulated genes	microtubule-based movement	1/121	12/2183	0.496446	0.985069	0.921702	CNAG_05752	1
GO:0009893	biological process by down regulated genes	positive regulation of metabolic process	1/121	12/2183	0.496446	0.985069	0.921702	CNAG_03191	1
GO:0017038	biological process by down regulated genes	protein import	1/121	12/2183	0.496446	0.985069	0.921702	CNAG_01569	1
GO:0031325	biological process by down regulated genes	positive regulation of cellular metabolic process	1/121	12/2183	0.496446	0.985069	0.921702	CNAG_03191	1
GO:0042440	biological process by down regulated genes	pigment metabolic process	1/121	12/2183	0.496446	0.985069	0.921702	CNAG_05809	1
GO:0071103	biological process by down regulated genes	DNA conformation change	1/121	12/2183	0.496446	0.985069	0.921702	CNAG_04168	1
GO:0006650	biological process by down regulated genes	glycerophospholipid metabolic process	2/121	30/2183	0.502456	0.985069	0.921702	CNAG_07744/CNAG_07354	2
GO:0046486	biological process by down regulated genes	glycerolipid metabolic process	2/121	30/2183	0.502456	0.985069	0.921702	CNAG_07744/CNAG_07354	2
GO:0043038	biological process by down regulated genes	amino acid activation	2/121	31/2183	0.520232	0.985069	0.921702	CNAG_01382/CNAG_04896	2
GO:0043039	biological process by down regulated genes	tRNA aminoacylation	2/121	31/2183	0.520232	0.985069	0.921702	CNAG_01382/CNAG_04896	2
GO:0072594	biological process by down regulated genes	establishment of protein localization to organelle	2/121	31/2183	0.520232	0.985069	0.921702	CNAG_05240/CNAG_01569	2
GO:0046907	biological process by down regulated genes	intracellular transport	6/121	104/2183	0.522403	0.985069	0.921702	CNAG_05240/CNAG_06532/CNAG_05248/CNAG_06376/CNAG_01569/CNAG_00148	6
GO:0006066	biological process by down regulated genes	alcohol metabolic process	1/121	13/2183	0.524512	0.985069	0.921702	CNAG_01539	1
GO:0022904	biological process by down regulated genes	respiratory electron transport chain	1/121	13/2183	0.524512	0.985069	0.921702	CNAG_01323	1
GO:0065002	biological process by down regulated genes	intracellular protein transmembrane transport	1/121	13/2183	0.524512	0.985069	0.921702	CNAG_01569	1
GO:0070585	biological process by down regulated genes	protein localization to mitochondrion	1/121	13/2183	0.524512	0.985069	0.921702	CNAG_01569	1
GO:0071806	biological process by down regulated genes	protein transmembrane transport	1/121	13/2183	0.524512	0.985069	0.921702	CNAG_01569	1
GO:0072655	biological process by down regulated genes	establishment of protein localization to mitochondrion	1/121	13/2183	0.524512	0.985069	0.921702	CNAG_01569	1
GO:0035556	biological process by down regulated genes	intracellular signal transduction	4/121	68/2183	0.527097	0.985069	0.921702	CNAG_01063/CNAG_07744/CNAG_04119/CNAG_00547	4
GO:0006397	biological process by down regulated genes	mRNA processing	3/121	50/2183	0.531052	0.985069	0.921702	CNAG_00781/CNAG_03761/CNAG_05776	3
GO:0051649	biological process by down regulated genes	establishment of localization in cell	6/121	105/2183	0.532068	0.985069	0.921702	CNAG_05240/CNAG_06532/CNAG_05248/CNAG_06376/CNAG_01569/CNAG_00148	6
GO:0006886	biological process by down regulated genes	intracellular protein transport	5/121	87/2183	0.534963	0.985069	0.921702	CNAG_05240/CNAG_06532/CNAG_05248/CNAG_06376/CNAG_01569	5
GO:0006605	biological process by down regulated genes	protein targeting	2/121	32/2183	0.537585	0.985069	0.921702	CNAG_05240/CNAG_01569	2
GO:0044282	biological process by down regulated genes	small molecule catabolic process	2/121	32/2183	0.537585	0.985069	0.921702	CNAG_06672/CNAG_04467	2
GO:0071702	biological process by down regulated genes	organic substance transport	8/121	143/2183	0.544724	0.985069	0.921702	CNAG_06290/CNAG_06963/CNAG_05662/CNAG_05240/CNAG_06532/CNAG_05248/CNAG_06376/CNAG_01569	8
GO:0006289	biological process by down regulated genes	nucleotide-excision repair	1/121	14/2183	0.551025	0.985069	0.921702	CNAG_03213	1
GO:0006643	biological process by down regulated genes	membrane lipid metabolic process	1/121	14/2183	0.551025	0.985069	0.921702	CNAG_01044	1
GO:0009152	biological process by down regulated genes	purine ribonucleotide biosynthetic process	2/121	33/2183	0.554506	0.985069	0.921702	CNAG_02916/CNAG_02007	2
GO:0043623	biological process by down regulated genes	cellular protein complex assembly	2/121	33/2183	0.554506	0.985069	0.921702	CNAG_05626/CNAG_01818	2
GO:0050789	biological process by down regulated genes	regulation of biological process	14/121	256/2183	0.566765	0.985069	0.921702	CNAG_00781/CNAG_05626/CNAG_07491/CNAG_04824/CNAG_01063/CNAG_02175/CNAG_05782/CNAG_06175/CNAG_03191/CNAG_07744/CNAG_04119/CNAG_03742/CNAG_06744/CNAG_00547	14
GO:0033365	biological process by down regulated genes	protein localization to organelle	2/121	34/2183	0.570991	0.985069	0.921702	CNAG_05240/CNAG_01569	2
GO:0065003	biological process by down regulated genes	macromolecular complex assembly	4/121	72/2183	0.573449	0.985069	0.921702	CNAG_05626/CNAG_01818/CNAG_00148/CNAG_04168	4
GO:0000070	biological process by down regulated genes	mitotic sister chromatid segregation	1/121	15/2183	0.576072	0.985069	0.921702	CNAG_04824	1
GO:0000096	biological process by down regulated genes	sulfur amino acid metabolic process	1/121	15/2183	0.576072	0.985069	0.921702	CNAG_00760	1
GO:0015985	biological process by down regulated genes	energy coupled proton transport, down electrochemical gradient	1/121	15/2183	0.576072	0.985069	0.921702	CNAG_02916	1
GO:0015986	biological process by down regulated genes	ATP synthesis coupled proton transport	1/121	15/2183	0.576072	0.985069	0.921702	CNAG_02916	1
GO:0061024	biological process by down regulated genes	membrane organization	1/121	15/2183	0.576072	0.985069	0.921702	CNAG_00148	1
GO:0006164	biological process by down regulated genes	purine nucleotide biosynthetic process	2/121	35/2183	0.587034	0.985069	0.921702	CNAG_02916/CNAG_02007	2
GO:0009156	biological process by down regulated genes	ribonucleoside monophosphate biosynthetic process	2/121	35/2183	0.587034	0.985069	0.921702	CNAG_02916/CNAG_02007	2
GO:0042592	biological process by down regulated genes	homeostatic process	2/121	35/2183	0.587034	0.985069	0.921702	CNAG_05626/CNAG_07491	2
GO:0010468	biological process by down regulated genes	regulation of gene expression	5/121	93/2183	0.596038	0.985069	0.921702	CNAG_00781/CNAG_02175/CNAG_05782/CNAG_03742/CNAG_06744	5
GO:0000819	biological process by down regulated genes	sister chromatid segregation	1/121	16/2183	0.599732	0.985069	0.921702	CNAG_04824	1
GO:0006839	biological process by down regulated genes	mitochondrial transport	1/121	16/2183	0.599732	0.985069	0.921702	CNAG_01569	1
GO:1902582	biological process by down regulated genes	single-organism intracellular transport	1/121	16/2183	0.599732	0.985069	0.921702	CNAG_01569	1
GO:0009124	biological process by down regulated genes	nucleoside monophosphate biosynthetic process	2/121	36/2183	0.602634	0.985069	0.921702	CNAG_02916/CNAG_02007	2
GO:0019439	biological process by down regulated genes	aromatic compound catabolic process	2/121	36/2183	0.602634	0.985069	0.921702	CNAG_00781/CNAG_02175	2
GO:0051641	biological process by down regulated genes	cellular localization	6/121	114/2183	0.615075	0.985069	0.921702	CNAG_05240/CNAG_06532/CNAG_05248/CNAG_06376/CNAG_01569/CNAG_00148	6
GO:0034613	biological process by down regulated genes	cellular protein localization	5/121	95/2183	0.615406	0.985069	0.921702	CNAG_05240/CNAG_06532/CNAG_05248/CNAG_06376/CNAG_01569	5
GO:0070727	biological process by down regulated genes	cellular macromolecule localization	5/121	95/2183	0.615406	0.985069	0.921702	CNAG_05240/CNAG_06532/CNAG_05248/CNAG_06376/CNAG_01569	5
GO:0043933	biological process by down regulated genes	macromolecular complex subunit organization	4/121	76/2183	0.617201	0.985069	0.921702	CNAG_05626/CNAG_01818/CNAG_00148/CNAG_04168	4
GO:0044270	biological process by down regulated genes	cellular nitrogen compound catabolic process	2/121	37/2183	0.617791	0.985069	0.921702	CNAG_00781/CNAG_02175	2
GO:0006754	biological process by down regulated genes	ATP biosynthetic process	1/121	17/2183	0.622082	0.985069	0.921702	CNAG_02916	1
GO:0009063	biological process by down regulated genes	cellular amino acid catabolic process	1/121	17/2183	0.622082	0.985069	0.921702	CNAG_04467	1
GO:0009110	biological process by down regulated genes	vitamin biosynthetic process	1/121	17/2183	0.622082	0.985069	0.921702	CNAG_03592	1
GO:0042364	biological process by down regulated genes	water-soluble vitamin biosynthetic process	1/121	17/2183	0.622082	0.985069	0.921702	CNAG_03592	1
GO:0050790	biological process by down regulated genes	regulation of catalytic activity	1/121	17/2183	0.622082	0.985069	0.921702	CNAG_03191	1
GO:0072528	biological process by down regulated genes	pyrimidine-containing compound biosynthetic process	1/121	17/2183	0.622082	0.985069	0.921702	CNAG_03592	1
GO:1902580	biological process by down regulated genes	single-organism cellular localization	1/121	17/2183	0.622082	0.985069	0.921702	CNAG_01569	1
GO:0008380	biological process by down regulated genes	RNA splicing	2/121	38/2183	0.632505	0.985069	0.921702	CNAG_00781/CNAG_02534	2
GO:0009260	biological process by down regulated genes	ribonucleotide biosynthetic process	2/121	38/2183	0.632505	0.985069	0.921702	CNAG_02916/CNAG_02007	2
GO:0046390	biological process by down regulated genes	ribose phosphate biosynthetic process	2/121	38/2183	0.632505	0.985069	0.921702	CNAG_02916/CNAG_02007	2
GO:0046700	biological process by down regulated genes	heterocycle catabolic process	2/121	38/2183	0.632505	0.985069	0.921702	CNAG_00781/CNAG_02175	2
GO:0072522	biological process by down regulated genes	purine-containing compound biosynthetic process	2/121	38/2183	0.632505	0.985069	0.921702	CNAG_02916/CNAG_02007	2
GO:0006399	biological process by down regulated genes	tRNA metabolic process	3/121	58/2183	0.633709	0.985069	0.921702	CNAG_01382/CNAG_04896/CNAG_02534	3
GO:0006766	biological process by down regulated genes	vitamin metabolic process	1/121	18/2183	0.643194	0.985069	0.921702	CNAG_03592	1
GO:0006767	biological process by down regulated genes	water-soluble vitamin metabolic process	1/121	18/2183	0.643194	0.985069	0.921702	CNAG_03592	1
GO:0009066	biological process by down regulated genes	aspartate family amino acid metabolic process	1/121	18/2183	0.643194	0.985069	0.921702	CNAG_00760	1
GO:0016579	biological process by down regulated genes	protein deubiquitination	1/121	18/2183	0.643194	0.985069	0.921702	CNAG_03872	1
GO:0065009	biological process by down regulated genes	regulation of molecular function	1/121	18/2183	0.643194	0.985069	0.921702	CNAG_03191	1
GO:0072657	biological process by down regulated genes	protein localization to membrane	1/121	18/2183	0.643194	0.985069	0.921702	CNAG_05240	1
GO:0090150	biological process by down regulated genes	establishment of protein localization to membrane	1/121	18/2183	0.643194	0.985069	0.921702	CNAG_05240	1
GO:1901361	biological process by down regulated genes	organic cyclic compound catabolic process	2/121	39/2183	0.646778	0.985069	0.921702	CNAG_00781/CNAG_02175	2
GO:0009145	biological process by down regulated genes	purine nucleoside triphosphate biosynthetic process	1/121	19/2183	0.663135	0.985069	0.921702	CNAG_02916	1
GO:0009206	biological process by down regulated genes	purine ribonucleoside triphosphate biosynthetic process	1/121	19/2183	0.663135	0.985069	0.921702	CNAG_02916	1
GO:0016569	biological process by down regulated genes	covalent chromatin modification	1/121	19/2183	0.663135	0.985069	0.921702	CNAG_05782	1
GO:0051726	biological process by down regulated genes	regulation of cell cycle	1/121	19/2183	0.663135	0.985069	0.921702	CNAG_04824	1
GO:0072527	biological process by down regulated genes	pyrimidine-containing compound metabolic process	1/121	19/2183	0.663135	0.985069	0.921702	CNAG_03592	1
GO:0006812	biological process by down regulated genes	cation transport	2/121	41/2183	0.674016	0.985069	0.921702	CNAG_05626/CNAG_02916	2
GO:0065007	biological process by down regulated genes	biological regulation	14/121	275/2183	0.679655	0.985069	0.921702	CNAG_00781/CNAG_05626/CNAG_07491/CNAG_04824/CNAG_01063/CNAG_02175/CNAG_05782/CNAG_06175/CNAG_03191/CNAG_07744/CNAG_04119/CNAG_03742/CNAG_06744/CNAG_00547	14
GO:0033043	biological process by down regulated genes	regulation of organelle organization	1/121	20/2183	0.681971	0.985069	0.921702	CNAG_04824	1
GO:0043648	biological process by down regulated genes	dicarboxylic acid metabolic process	1/121	20/2183	0.681971	0.985069	0.921702	CNAG_04326	1
GO:0048518	biological process by down regulated genes	positive regulation of biological process	1/121	20/2183	0.681971	0.985069	0.921702	CNAG_03191	1
GO:0048522	biological process by down regulated genes	positive regulation of cellular process	1/121	20/2183	0.681971	0.985069	0.921702	CNAG_03191	1
GO:0048523	biological process by down regulated genes	negative regulation of cellular process	1/121	20/2183	0.681971	0.985069	0.921702	CNAG_04824	1
GO:0070646	biological process by down regulated genes	protein modification by small protein removal	1/121	20/2183	0.681971	0.985069	0.921702	CNAG_03872	1
GO:0022607	biological process by down regulated genes	cellular component assembly	4/121	84/2183	0.696018	0.990678	0.92695	CNAG_05626/CNAG_01818/CNAG_00148/CNAG_04168	4
GO:0009142	biological process by down regulated genes	nucleoside triphosphate biosynthetic process	1/121	21/2183	0.699762	0.990678	0.92695	CNAG_02916	1
GO:0009201	biological process by down regulated genes	ribonucleoside triphosphate biosynthetic process	1/121	21/2183	0.699762	0.990678	0.92695	CNAG_02916	1
GO:0055085	biological process by down regulated genes	transmembrane transport	10/121	204/2183	0.710247	0.990678	0.92695	CNAG_01529/CNAG_02361/CNAG_01946/CNAG_03051/CNAG_05130/CNAG_00904/CNAG_04142/CNAG_02916/CNAG_00539/CNAG_01569	10
GO:0051128	biological process by down regulated genes	regulation of cellular component organization	1/121	22/2183	0.716565	0.990678	0.92695	CNAG_04824	1
GO:0098813	biological process by down regulated genes	nuclear chromosome segregation	1/121	22/2183	0.716565	0.990678	0.92695	CNAG_04824	1
GO:0007067	biological process by down regulated genes	mitotic nuclear division	1/121	23/2183	0.732435	0.990678	0.92695	CNAG_04824	1
GO:0007264	biological process by down regulated genes	small GTPase mediated signal transduction	2/121	46/2183	0.734733	0.990678	0.92695	CNAG_04119/CNAG_00547	2
GO:0034622	biological process by down regulated genes	cellular macromolecular complex assembly	3/121	68/2183	0.738841	0.990678	0.92695	CNAG_05626/CNAG_01818/CNAG_04168	3
GO:0007059	biological process by down regulated genes	chromosome segregation	1/121	24/2183	0.747424	0.990678	0.92695	CNAG_04824	1
GO:0032268	biological process by down regulated genes	regulation of cellular protein metabolic process	1/121	24/2183	0.747424	0.990678	0.92695	CNAG_03191	1
GO:0090407	biological process by down regulated genes	organophosphate biosynthetic process	4/121	91/2183	0.755035	0.990678	0.92695	CNAG_05125/CNAG_02916/CNAG_01539/CNAG_02007	4
GO:0006811	biological process by down regulated genes	ion transport	2/121	48/2183	0.756215	0.990678	0.92695	CNAG_05626/CNAG_02916	2
GO:0006366	biological process by down regulated genes	transcription from RNA polymerase II promoter	1/121	25/2183	0.761579	0.990678	0.92695	CNAG_05290	1
GO:0080090	biological process by down regulated genes	regulation of primary metabolic process	4/121	92/2183	0.762711	0.990678	0.92695	CNAG_05782/CNAG_06175/CNAG_03191/CNAG_06744	4
GO:0006996	biological process by down regulated genes	organelle organization	7/121	155/2183	0.770901	0.990678	0.92695	CNAG_00740/CNAG_04824/CNAG_03723/CNAG_05782/CNAG_01569/CNAG_00148/CNAG_04168	7
GO:0007017	biological process by down regulated genes	microtubule-based process	1/121	26/2183	0.774948	0.990678	0.92695	CNAG_05752	1
GO:0015031	biological process by down regulated genes	protein transport	5/121	115/2183	0.777281	0.990678	0.92695	CNAG_05240/CNAG_06532/CNAG_05248/CNAG_06376/CNAG_01569	5
GO:0015833	biological process by down regulated genes	peptide transport	5/121	115/2183	0.777281	0.990678	0.92695	CNAG_05240/CNAG_06532/CNAG_05248/CNAG_06376/CNAG_01569	5
GO:0042886	biological process by down regulated genes	amide transport	5/121	115/2183	0.777281	0.990678	0.92695	CNAG_05240/CNAG_06532/CNAG_05248/CNAG_06376/CNAG_01569	5
GO:0000278	biological process by down regulated genes	mitotic cell cycle	1/121	27/2183	0.787572	0.990678	0.92695	CNAG_04824	1
GO:0000280	biological process by down regulated genes	nuclear division	1/121	27/2183	0.787572	0.990678	0.92695	CNAG_04824	1
GO:0008033	biological process by down regulated genes	tRNA processing	1/121	27/2183	0.787572	0.990678	0.92695	CNAG_02534	1
GO:1902600	biological process by down regulated genes	hydrogen ion transmembrane transport	1/121	27/2183	0.787572	0.990678	0.92695	CNAG_02916	1
GO:1903047	biological process by down regulated genes	mitotic cell cycle process	1/121	27/2183	0.787572	0.990678	0.92695	CNAG_04824	1
GO:0065008	biological process by down regulated genes	regulation of biological quality	2/121	52/2183	0.79474	0.990678	0.92695	CNAG_05626/CNAG_07491	2
GO:0007154	biological process by down regulated genes	cell communication	4/121	97/2183	0.798347	0.990678	0.92695	CNAG_01063/CNAG_07744/CNAG_04119/CNAG_00547	4
GO:0007165	biological process by down regulated genes	signal transduction	4/121	97/2183	0.798347	0.990678	0.92695	CNAG_01063/CNAG_07744/CNAG_04119/CNAG_00547	4
GO:0023052	biological process by down regulated genes	signaling	4/121	97/2183	0.798347	0.990678	0.92695	CNAG_01063/CNAG_07744/CNAG_04119/CNAG_00547	4
GO:0044700	biological process by down regulated genes	single organism signaling	4/121	97/2183	0.798347	0.990678	0.92695	CNAG_01063/CNAG_07744/CNAG_04119/CNAG_00547	4
GO:0006818	biological process by down regulated genes	hydrogen transport	1/121	28/2183	0.799494	0.990678	0.92695	CNAG_02916	1
GO:0015992	biological process by down regulated genes	proton transport	1/121	28/2183	0.799494	0.990678	0.92695	CNAG_02916	1
GO:0045184	biological process by down regulated genes	establishment of protein localization	5/121	120/2183	0.808461	0.990678	0.92695	CNAG_05240/CNAG_06532/CNAG_05248/CNAG_06376/CNAG_01569	5
GO:0006810	biological process by down regulated genes	transport	21/121	438/2183	0.809983	0.990678	0.92695	CNAG_06290/CNAG_01529/CNAG_02361/CNAG_06963/CNAG_05662/CNAG_01946/CNAG_03051/CNAG_00470/CNAG_05626/CNAG_05130/CNAG_00904/CNAG_04142/CNAG_02916/CNAG_00539/CNAG_05240/CNAG_06532/CNAG_05248/CNAG_06376/CNAG_05559/CNAG_01569/CNAG_00148	21
GO:0000375	biological process by down regulated genes	RNA splicing, via transesterification reactions	1/121	29/2183	0.810752	0.990678	0.92695	CNAG_00781	1
GO:0000377	biological process by down regulated genes	RNA splicing, via transesterification reactions with bulged adenosine as nucleophile	1/121	29/2183	0.810752	0.990678	0.92695	CNAG_00781	1
GO:0000398	biological process by down regulated genes	mRNA splicing, via spliceosome	1/121	29/2183	0.810752	0.990678	0.92695	CNAG_00781	1
GO:0006418	biological process by down regulated genes	tRNA aminoacylation for protein translation	1/121	29/2183	0.810752	0.990678	0.92695	CNAG_04896	1
GO:0007005	biological process by down regulated genes	mitochondrion organization	1/121	29/2183	0.810752	0.990678	0.92695	CNAG_01569	1
GO:0015672	biological process by down regulated genes	monovalent inorganic cation transport	1/121	29/2183	0.810752	0.990678	0.92695	CNAG_02916	1
GO:0008104	biological process by down regulated genes	protein localization	5/121	122/2183	0.819937	0.990678	0.92695	CNAG_05240/CNAG_06532/CNAG_05248/CNAG_06376/CNAG_01569	5
GO:0071705	biological process by down regulated genes	nitrogen compound transport	5/121	122/2183	0.819937	0.990678	0.92695	CNAG_05240/CNAG_06532/CNAG_05248/CNAG_06376/CNAG_01569	5
GO:0051234	biological process by down regulated genes	establishment of localization	21/121	441/2183	0.820123	0.990678	0.92695	CNAG_06290/CNAG_01529/CNAG_02361/CNAG_06963/CNAG_05662/CNAG_01946/CNAG_03051/CNAG_00470/CNAG_05626/CNAG_05130/CNAG_00904/CNAG_04142/CNAG_02916/CNAG_00539/CNAG_05240/CNAG_06532/CNAG_05248/CNAG_06376/CNAG_05559/CNAG_01569/CNAG_00148	21
GO:0034220	biological process by down regulated genes	ion transmembrane transport	1/121	30/2183	0.821383	0.990678	0.92695	CNAG_02916	1
GO:0098655	biological process by down regulated genes	cation transmembrane transport	1/121	30/2183	0.821383	0.990678	0.92695	CNAG_02916	1
GO:0098660	biological process by down regulated genes	inorganic ion transmembrane transport	1/121	30/2183	0.821383	0.990678	0.92695	CNAG_02916	1
GO:0098662	biological process by down regulated genes	inorganic cation transmembrane transport	1/121	30/2183	0.821383	0.990678	0.92695	CNAG_02916	1
GO:0048285	biological process by down regulated genes	organelle fission	1/121	31/2183	0.831422	0.990678	0.92695	CNAG_04824	1
GO:0016043	biological process by down regulated genes	cellular component organization	9/121	208/2183	0.832473	0.990678	0.92695	CNAG_00740/CNAG_05626/CNAG_04824/CNAG_03723/CNAG_05782/CNAG_01818/CNAG_01569/CNAG_00148/CNAG_04168	9
GO:0051179	biological process by down regulated genes	localization	21/121	447/2183	0.839267	0.990678	0.92695	CNAG_06290/CNAG_01529/CNAG_02361/CNAG_06963/CNAG_05662/CNAG_01946/CNAG_03051/CNAG_00470/CNAG_05626/CNAG_05130/CNAG_00904/CNAG_04142/CNAG_02916/CNAG_00539/CNAG_05240/CNAG_06532/CNAG_05248/CNAG_06376/CNAG_05559/CNAG_01569/CNAG_00148	21
GO:0016053	biological process by down regulated genes	organic acid biosynthetic process	3/121	82/2183	0.844517	0.990678	0.92695	CNAG_02100/CNAG_02577/CNAG_05759	3
GO:0046394	biological process by down regulated genes	carboxylic acid biosynthetic process	3/121	82/2183	0.844517	0.990678	0.92695	CNAG_02100/CNAG_02577/CNAG_05759	3
GO:0006396	biological process by down regulated genes	RNA processing	5/121	127/2183	0.846249	0.990678	0.92695	CNAG_00781/CNAG_03761/CNAG_05776/CNAG_02426/CNAG_02534	5
GO:0009165	biological process by down regulated genes	nucleotide biosynthetic process	2/121	59/2183	0.849443	0.990678	0.92695	CNAG_02916/CNAG_02007	2
GO:1901293	biological process by down regulated genes	nucleoside phosphate biosynthetic process	2/121	59/2183	0.849443	0.990678	0.92695	CNAG_02916/CNAG_02007	2
GO:0033036	biological process by down regulated genes	macromolecule localization	5/121	128/2183	0.851117	0.990678	0.92695	CNAG_05240/CNAG_06532/CNAG_05248/CNAG_06376/CNAG_01569	5
GO:0050794	biological process by down regulated genes	regulation of cellular process	10/121	234/2183	0.854327	0.990678	0.92695	CNAG_05626/CNAG_07491/CNAG_04824/CNAG_01063/CNAG_05782/CNAG_03191/CNAG_07744/CNAG_04119/CNAG_06744/CNAG_00547	10
GO:0034660	biological process by down regulated genes	ncRNA metabolic process	3/121	85/2183	0.861678	0.990678	0.92695	CNAG_01382/CNAG_04896/CNAG_02534	3
GO:0006355	biological process by down regulated genes	regulation of transcription, DNA-templated	2/121	61/2183	0.86246	0.990678	0.92695	CNAG_05782/CNAG_06744	2
GO:0051252	biological process by down regulated genes	regulation of RNA metabolic process	2/121	61/2183	0.86246	0.990678	0.92695	CNAG_05782/CNAG_06744	2
GO:1903506	biological process by down regulated genes	regulation of nucleic acid-templated transcription	2/121	61/2183	0.86246	0.990678	0.92695	CNAG_05782/CNAG_06744	2
GO:2001141	biological process by down regulated genes	regulation of RNA biosynthetic process	2/121	61/2183	0.86246	0.990678	0.92695	CNAG_05782/CNAG_06744	2
GO:1901564	biological process by down regulated genes	organonitrogen compound metabolic process	20/121	436/2183	0.863668	0.990678	0.92695	CNAG_02460/CNAG_03128/CNAG_01044/CNAG_04523/CNAG_02888/CNAG_01382/CNAG_05809/CNAG_02916/CNAG_04467/CNAG_04896/CNAG_02007/CNAG_06534/CNAG_01026/CNAG_03245/CNAG_04726/CNAG_06770/CNAG_00760/CNAG_03592/CNAG_01323/CNAG_01395	20
GO:0043603	biological process by down regulated genes	cellular amide metabolic process	8/121	198/2183	0.874387	0.994649	0.930666	CNAG_03128/CNAG_01044/CNAG_02888/CNAG_01382/CNAG_04896/CNAG_01026/CNAG_04726/CNAG_00760	8
GO:0019219	biological process by down regulated genes	regulation of nucleobase-containing compound metabolic process	2/121	64/2183	0.880078	0.994649	0.930666	CNAG_05782/CNAG_06744	2
GO:0006351	biological process by down regulated genes	transcription, DNA-templated	8/121	200/2183	0.881299	0.994649	0.930666	CNAG_03018/CNAG_06425/CNAG_04041/CNAG_06861/CNAG_07715/CNAG_05782/CNAG_05290/CNAG_06744	8
GO:0032774	biological process by down regulated genes	RNA biosynthetic process	8/121	200/2183	0.881299	0.994649	0.930666	CNAG_03018/CNAG_06425/CNAG_04041/CNAG_06861/CNAG_07715/CNAG_05782/CNAG_05290/CNAG_06744	8
GO:0097659	biological process by down regulated genes	nucleic acid-templated transcription	8/121	200/2183	0.881299	0.994649	0.930666	CNAG_03018/CNAG_06425/CNAG_04041/CNAG_06861/CNAG_07715/CNAG_05782/CNAG_05290/CNAG_06744	8
GO:0022402	biological process by down regulated genes	cell cycle process	1/121	39/2183	0.893976	0.999894	0.935573	CNAG_04824	1
GO:0031323	biological process by down regulated genes	regulation of cellular metabolic process	3/121	92/2183	0.895452	0.999894	0.935573	CNAG_05782/CNAG_03191/CNAG_06744	3
GO:0019438	biological process by down regulated genes	aromatic compound biosynthetic process	13/121	311/2183	0.901363	0.999894	0.935573	CNAG_02460/CNAG_03018/CNAG_06425/CNAG_04041/CNAG_06861/CNAG_05809/CNAG_02916/CNAG_07715/CNAG_05782/CNAG_02007/CNAG_05290/CNAG_06744/CNAG_03592	13
GO:1901362	biological process by down regulated genes	organic cyclic compound biosynthetic process	14/121	333/2183	0.905161	0.999894	0.935573	CNAG_02460/CNAG_03018/CNAG_06425/CNAG_04041/CNAG_06861/CNAG_05125/CNAG_05809/CNAG_02916/CNAG_07715/CNAG_05782/CNAG_02007/CNAG_05290/CNAG_06744/CNAG_03592	14
GO:0016070	biological process by down regulated genes	RNA metabolic process	16/121	379/2183	0.916889	0.999894	0.935573	CNAG_00781/CNAG_03018/CNAG_06425/CNAG_04041/CNAG_06861/CNAG_03761/CNAG_01382/CNAG_07715/CNAG_05776/CNAG_02175/CNAG_05782/CNAG_04896/CNAG_02426/CNAG_05290/CNAG_06744/CNAG_02534	16
GO:0018130	biological process by down regulated genes	heterocycle biosynthetic process	13/121	318/2183	0.917462	0.999894	0.935573	CNAG_02460/CNAG_03018/CNAG_06425/CNAG_04041/CNAG_06861/CNAG_05809/CNAG_02916/CNAG_07715/CNAG_05782/CNAG_02007/CNAG_05290/CNAG_06744/CNAG_03592	13
GO:0044085	biological process by down regulated genes	cellular component biogenesis	4/121	126/2183	0.929113	0.999894	0.935573	CNAG_05626/CNAG_01818/CNAG_00148/CNAG_04168	4
GO:0010556	biological process by down regulated genes	regulation of macromolecule biosynthetic process	2/121	79/2183	0.940918	0.999894	0.935573	CNAG_05782/CNAG_06744	2
GO:0051171	biological process by down regulated genes	regulation of nitrogen compound metabolic process	2/121	79/2183	0.940918	0.999894	0.935573	CNAG_05782/CNAG_06744	2
GO:2000112	biological process by down regulated genes	regulation of cellular macromolecule biosynthetic process	2/121	79/2183	0.940918	0.999894	0.935573	CNAG_05782/CNAG_06744	2
GO:0034654	biological process by down regulated genes	nucleobase-containing compound biosynthetic process	10/121	268/2183	0.942929	0.999894	0.935573	CNAG_03018/CNAG_06425/CNAG_04041/CNAG_06861/CNAG_02916/CNAG_07715/CNAG_05782/CNAG_02007/CNAG_05290/CNAG_06744	10
GO:0009889	biological process by down regulated genes	regulation of biosynthetic process	2/121	80/2183	0.943709	0.999894	0.935573	CNAG_05782/CNAG_06744	2
GO:0031326	biological process by down regulated genes	regulation of cellular biosynthetic process	2/121	80/2183	0.943709	0.999894	0.935573	CNAG_05782/CNAG_06744	2
GO:0071840	biological process by down regulated genes	cellular component organization or biogenesis	9/121	249/2183	0.947581	0.999894	0.935573	CNAG_00740/CNAG_05626/CNAG_04824/CNAG_03723/CNAG_05782/CNAG_01818/CNAG_01569/CNAG_00148/CNAG_04168	9
GO:0006518	biological process by down regulated genes	peptide metabolic process	6/121	182/2183	0.948654	0.999894	0.935573	CNAG_03128/CNAG_02888/CNAG_01382/CNAG_04896/CNAG_01026/CNAG_04726	6
GO:1901137	biological process by down regulated genes	carbohydrate derivative biosynthetic process	2/121	82/2183	0.948921	0.999894	0.935573	CNAG_02916/CNAG_02007	2
GO:0006464	biological process by down regulated genes	cellular protein modification process	3/121	110/2183	0.951086	0.999894	0.935573	CNAG_04656/CNAG_03191/CNAG_03872	3
GO:0036211	biological process by down regulated genes	protein modification process	3/121	110/2183	0.951086	0.999894	0.935573	CNAG_04656/CNAG_03191/CNAG_03872	3
GO:0034470	biological process by down regulated genes	ncRNA processing	1/121	53/2183	0.953109	0.999894	0.935573	CNAG_02534	1
GO:1902589	biological process by down regulated genes	single-organism organelle organization	1/121	53/2183	0.953109	0.999894	0.935573	CNAG_04824	1
GO:0006520	biological process by down regulated genes	cellular amino acid metabolic process	4/121	137/2183	0.954114	0.999894	0.935573	CNAG_01382/CNAG_04467/CNAG_04896/CNAG_00760	4
GO:0006950	biological process by down regulated genes	response to stress	4/121	138/2183	0.955933	0.999894	0.935573	CNAG_02692/CNAG_03213/CNAG_01446/CNAG_05256	4
GO:0043412	biological process by down regulated genes	macromolecule modification	4/121	139/2183	0.957686	0.999894	0.935573	CNAG_05782/CNAG_04656/CNAG_03191/CNAG_03872	4
GO:0050896	biological process by down regulated genes	response to stimulus	8/121	236/2183	0.961201	0.999894	0.935573	CNAG_02692/CNAG_01063/CNAG_07744/CNAG_04119/CNAG_03213/CNAG_01446/CNAG_00547/CNAG_05256	8
GO:0007049	biological process by down regulated genes	cell cycle	1/121	58/2183	0.965008	0.999894	0.935573	CNAG_04824	1
GO:0051716	biological process by down regulated genes	cellular response to stimulus	6/121	208/2183	0.980449	0.999894	0.935573	CNAG_02692/CNAG_01063/CNAG_07744/CNAG_04119/CNAG_03213/CNAG_00547	6
GO:1901605	biological process by down regulated genes	alpha-amino acid metabolic process	1/121	75/2183	0.987134	0.999894	0.935573	CNAG_00760	1
GO:0019538	biological process by down regulated genes	protein metabolic process	11/121	337/2183	0.987378	0.999894	0.935573	CNAG_01382/CNAG_05792/CNAG_04656/CNAG_04896/CNAG_06175/CNAG_03191/CNAG_03872/CNAG_07347/CNAG_00482/CNAG_04726/CNAG_03721	11
GO:0033554	biological process by down regulated genes	cellular response to stress	2/121	111/2183	0.988148	0.999894	0.935573	CNAG_02692/CNAG_03213	2
GO:0006281	biological process by down regulated genes	DNA repair	1/121	97/2183	0.996519	0.999894	0.935573	CNAG_03213	1
GO:0044271	biological process by down regulated genes	cellular nitrogen compound biosynthetic process	16/121	487/2183	0.996719	0.999894	0.935573	CNAG_02460/CNAG_03018/CNAG_06425/CNAG_04041/CNAG_06861/CNAG_01382/CNAG_05809/CNAG_02916/CNAG_07715/CNAG_05782/CNAG_04896/CNAG_02007/CNAG_05290/CNAG_04726/CNAG_06744/CNAG_03592	16
GO:0006412	biological process by down regulated genes	translation	3/121	171/2183	0.99727	0.999894	0.935573	CNAG_01382/CNAG_04896/CNAG_04726	3
GO:0043043	biological process by down regulated genes	peptide biosynthetic process	3/121	173/2183	0.997532	0.999894	0.935573	CNAG_01382/CNAG_04896/CNAG_04726	3
GO:0006974	biological process by down regulated genes	cellular response to DNA damage stimulus	1/121	103/2183	0.997569	0.999894	0.935573	CNAG_03213	1
GO:0044267	biological process by down regulated genes	cellular protein metabolic process	8/121	319/2183	0.998381	0.999894	0.935573	CNAG_01382/CNAG_05792/CNAG_04656/CNAG_04896/CNAG_03191/CNAG_03872/CNAG_00482/CNAG_04726	8
GO:0043604	biological process by down regulated genes	amide biosynthetic process	3/121	183/2183	0.998518	0.999894	0.935573	CNAG_01382/CNAG_04896/CNAG_04726	3
GO:1901566	biological process by down regulated genes	organonitrogen compound biosynthetic process	8/121	338/2183	0.99929	0.999894	0.935573	CNAG_02460/CNAG_01382/CNAG_05809/CNAG_02916/CNAG_04896/CNAG_02007/CNAG_04726/CNAG_03592	8
GO:0006259	biological process by down regulated genes	DNA metabolic process	1/121	144/2183	0.999797	0.999894	0.935573	CNAG_03213	1
GO:0034645	biological process by down regulated genes	cellular macromolecule biosynthetic process	11/121	452/2183	0.999873	0.999894	0.935573	CNAG_03018/CNAG_06425/CNAG_04041/CNAG_06861/CNAG_01382/CNAG_07715/CNAG_05782/CNAG_04896/CNAG_05290/CNAG_04726/CNAG_06744	11
GO:0009059	biological process by down regulated genes	macromolecule biosynthetic process	11/121	456/2183	0.999894	0.999894	0.935573	CNAG_03018/CNAG_06425/CNAG_04041/CNAG_06861/CNAG_01382/CNAG_07715/CNAG_05782/CNAG_04896/CNAG_05290/CNAG_04726/CNAG_06744	11
